# Supplementary material for: The Genetic Architecture for Phenotypic Plasticity of the Rice Grain Ionome
Source: PubMed Central journal article supplement (PMC7052182; doi:10.3389/fpls.2020.00012), 2020-02-25
Supplement: DataSheet_1.pdf [file DataSheet_1.pdf]

Supplementary data for

**The genetic architecture for phenotypic plasticity of the rice  
grain ionome**

To appear in: *Frontiers in Plant Science*

**Authors:**

Yongjun Tan<sup>1,2</sup>, Jieqiang Zhou<sup>1,3</sup>, Jiurong Wang<sup>1</sup>, Liang Sun<sup>1#</sup>

<sup>1</sup> Key Laboratory of Agro-Ecological Processes in Subtropical Region, Institute of Subtropical Agriculture, Chinese Academy of Sciences, Changsha, Hunan, 410125, China

<sup>2</sup> University of Chinese Academy of Science, Beijing 100049, China

<sup>3</sup> College of Agronomy, Hunan Agricultural University, Changsha 410128, China

**Contact information:**

Yongjun Tan ([tanyongjun0815@163.com](mailto:tanyongjun0815@163.com), ORCID: 0000-0003-1041-4912)

Jieqiang Zhou ([crackzjq@163.com](mailto:crackzjq@163.com)),

Jiurong Wang ([jrwang@isa.ac.cn](mailto:jrwang@isa.ac.cn)),

Liang Sun ([sunliang037@isa.ac.cn](mailto:sunliang037@isa.ac.cn))

# Correspondence should be addressed to Liang Sun ([sunliang037@isa.ac.cn](mailto:sunliang037@isa.ac.cn)).

This PDF file include:

Supplemental Table 1-6

Supplemental Figure 1-61

**Table S1** List of all planting environments

| Environments            | 2014Field-1              | 2014Field-2              | 2015Field-1              | 2015Field-2                  | 2016Field-1              | 2016Field-2              | 2016Field-3              | 2017Field-1              |
|-------------------------|--------------------------|--------------------------|--------------------------|------------------------------|--------------------------|--------------------------|--------------------------|--------------------------|
| Position                | Changsha,<br>Hunan,China | Changsha,<br>Hunan,China | Changsha,<br>Hunan,China | Songjiang,<br>Shanghai,China | Changsha,<br>Hunan,China | Changsha,<br>Hunan,China | Changsha,<br>Hunan,China | Chenzhou,<br>Hunan,China |
| Latitude                | 28°44'N                  | 28°44'N                  | 28°44'N                  | 30°94'N                      | 28°44'N                  | 28°44'N                  | 28°19'N                  | 25°70'N                  |
| Longitude               | 113°06'E                 | 113°06'E                 | 113°06'E                 | 121°13'E                     | 113°06'E                 | 113°06'E                 | 113°08'E                 | 112°71'E                 |
| Irrigation <sup>a</sup> | Unflooded                | Unflooded                | Unflooded                | Unflooded                    | Unflooded                | Unflooded                | Unflooded                | Flooded                  |
| Replicates              | 3                        | 3                        | 3                        | 1                            | 3                        | 3                        | 1                        | 3                        |
| As (µg/g)               | NA                       | NA                       | NA                       | 12.3±0.17                    | 13.1±0.16                | 10.7±0.31                | 25.2±0.34                | 54.0±2.4                 |
| Ca(mg/g)                | 2.34±0.08                | 2.15±0.10                | 2.37±0.19                | 3.24±0.13                    | 2.85±0.21                | 2.75±0.16                | 2.37±0.07                | NA                       |
| Cd (µg/g)               | 1.43±0.18                | 1.62±0.25                | 1.52±0.19                | 0.06±0.01                    | 1.22±0.2                 | 0.56±0.19                | 0.09±0.02                | 1.30±0.15                |
| Cr (µg/g)               | NA                       | NA                       | NA                       | NA                           | 42.7±5.7                 | 56.1±3.7                 | 39.7±4.1                 | 41.6±3.8                 |
| Cu (µg/g)               | 19.5±1.9                 | 18.5±2.7                 | 23.7±1.8                 | 24.6±3.4                     | 20.2±2.6                 | 25.9±4.1                 | 16.4±1.8                 | 22.5±2.5                 |
| Fe (mg/g)               | 32±4.1                   | 52±4.3                   | 52±3.7                   | 34±3.9                       | 24±4.1                   | 39±5.2                   | 51±3.8                   | 43±2.8                   |
| K(mg/g)                 | NA                       | NA                       | NA                       | 4.21±0.3                     | 3.97±0.26                | 4.02±0.15                | 3.78±0.08                | NA                       |
| Mg(mg/g)                | 2.06±0.15                | 2.14±0.21                | 3.16±0.14                | 3.76±0.11                    | 3.31±0.20                | 3.41±0.18                | 3.67±0.24                | NA                       |
| Mn (µg/g)               | 268.4±13.2               | 189.3±12.9               | 248.2±15.7               | 198.08±8.4                   | 256.6±15.8               | 208.7±13.4               | 428.1±20.5               | 234.7±19.5               |
| N(mg/g)                 | NA                       | NA                       | 2.41±0.15                | 2.79±0.09                    | 2.73±0.16                | 2.61±0.14                | 2.78±0.10                | 3.12±0.17                |
| Ni (µg/g)               | 38.6±5.3                 | 15.3±3.4                 | 20.1±5.7                 | 6.8±2.9                      | 14.8±2.9                 | 11.5±4.1                 | 3.5±1.2                  | 2.9±2.1                  |
| P(µg/g)                 | NA                       | NA                       | NA                       | 19±3.7                       | 31±4.2                   | 29±6.1                   | 24±4.9                   | NA                       |
| Pb (µg/g)               | 94.1±6.2                 | 25.5±5.4                 | 87.7±9.2                 | 76.1±6.6                     | 94.6±6.2                 | 84.4±5.1                 | 36.8±5.4                 | 86.2±6.7                 |
| S(mg/g)                 | NA                       | NA                       | NA                       | 0.26±0.02                    | 0.31±0.04                | 0.46±0.02                | 0.37±0.03                | NA                       |
| Se (µg/g)               | NA                       | NA                       | NA                       | 0.25±0.03                    | 0.49±0.12                | 0.82±0.21                | 0.48±0.07                | 0.46±0.15                |
| Zn (µg/g)               | 119.4±7.5                | 78.3±3.7                 | 134.9±6.7                | 52.4±3.8                     | 126.3±8.4                | 119.6±4.1                | 107.3±3.4                | 94.5±6.1                 |
| pH                      | 5.8±0.2                  | 6.2±0.3                  | 5.2±0.1                  | 6.4±0.2                      | 5.5±0.1                  | 5.2±0.2                  | 6.7±0.2                  | 7.8±0.4                  |
| Sowing date             | 2014.05.30               | 2014.05.30               | 2015.06.1                | 2015.06.8                    | 2016.05.25               | 2016.05.25               | 2016.05.27               | 2017.06.13               |

A total of 5-13 soil samples (0-15 cm depth) were collected after harvest in each field for analyzing the total elemental concentration and pH of soil. Data are means ± SD of all samples.

a: The water regime in the period from the flowering of the first accession to the harvest of the last accession. The unflooded field was flush irrigated about six hours when needed to prevent water stress.

**Table S2** Phenotypic variance partition with analysis of variance (ANOVA)

| Source         | As     | Ca     | Cd     | Cr     | Cu     | Fe     | K      | Mg     | Mn     | Na     | Ni     | P      | Pb     | S      | Se     | Zn     | Mean   |
|----------------|--------|--------|--------|--------|--------|--------|--------|--------|--------|--------|--------|--------|--------|--------|--------|--------|--------|
| Genoeype(G)    | 0.05%  | 3.94%  | 15.69% | 0.02%  | 21.07% | 2.34%  | 31.06% | 6.03%  | 17.21% | 5.05%  | 2.55%  | 44.66% | 1.52%  | 46.25% | 2.59%  | 27.06% | 14.19% |
| Environment(E) | 97.80% | 58.92% | 57.76% | 18.82% | 28.87% | 76.81% | 29.97% | 87.20% | 42.63% | 4.18%  | 81.36% | 7.24%  | 11.31% | 26.49% | 21.65% | 52.30% | 43.96% |
| GxE            | 0.12%  | 24.91% | 11.88% | 0.01%  | 9.97%  | 0.43%  | 0.00%  | 1.30%  | 10.33% | 0.00%  | 6.10%  | 3.03%  | 0.00%  | 0.01%  | 0.00%  | 5.85%  | 4.62%  |
| Residual       | 2.03%  | 12.22% | 14.67% | 81.18% | 40.09% | 20.42% | 38.96% | 5.48%  | 29.83% | 90.77% | 9.99%  | 45.07% | 87.17% | 27.24% | 75.77% | 14.79% | 37.23% |

**Table S3** The kurtosis ( $g_2$ ) of each phenotypic measure

|                       | As   | Ca    | Cd    | Cr    | Cu   | Fe   | K    | Mg   | Mn   | Na   | Ni    | P    | Pb    | S     | Se   | Zn    |
|-----------------------|------|-------|-------|-------|------|------|------|------|------|------|-------|------|-------|-------|------|-------|
| Mean Phenotype        | 0.02 | 0.39  | -0.16 | -0.46 | 0.27 | 0.80 | 0.43 | 0.74 | 1.23 | 0.97 | 4.05  | 0.42 | 0.64  | 0.35  | 0.54 | -0.23 |
| Linear Plasticity     | 0.08 | 25.66 | 0.46  | 2.09  | 0.95 | 2.45 | 0.46 | 0.33 | 0.70 | 0.60 | 0.58  | 9.17 | 1.39  | 0.39  | 1.11 | 2.16  |
| Non-linear Plasticity | 6.63 | -0.11 | 3.82  | 6.72  | 6.93 | 6.20 | 0.34 | 0.90 | 6.91 | 1.62 | 14.42 | 1.79 | 15.89 | -0.16 | 6.49 | 11.14 |

**Table S4** Marker-based heritability ( $h^2$ ) of three phenotypic measures for each element

|                       | As   | Ca   | Cd   | Cr   | Cu   | Fe   | K    | Mg   | Mn   | Na   | Ni   | P    | Pb   | S    | Se   | Zn   |
|-----------------------|------|------|------|------|------|------|------|------|------|------|------|------|------|------|------|------|
| Mean Phenotype        | 0.50 | 0.57 | 0.50 | 0.50 | 0.62 | 0.54 | 0.76 | 0.82 | 0.53 | 0.11 | 0.53 | 0.82 | 0.50 | 0.86 | 0.41 | 0.61 |
| Linear Plasticity     | 0.12 | 0.02 | 0.90 | 0.26 | 0.41 | 0.39 | 0.66 | 0.56 | 0.58 | 0.32 | 0.74 | 0.32 | 0.02 | 0.47 | 0.33 | 0.73 |
| Non-linear Plasticity | 0.03 | 0.36 | 0.64 | 0.04 | 0.03 | 0.05 | 0.07 | 0.60 | 0.22 | 0.13 | 0.13 | 0.38 | 0.01 | 0.40 | 0.07 | 0.14 |

**Table S5** List of all identified SALs(significantly associated loci)

| Phenotypic Measures | Elements | Chr | Pos        | P.value (GWAS) | Panel           | MAF  | PVE (Phenotypic measures) | Significant Region Start(Mb) | Significant Region End(Mb) | Allele Effect (Nip) | Overlap (Between Panels) | Overlap (Between Measures) | Reference | Genes       |
|---------------------|----------|-----|------------|----------------|-----------------|------|---------------------------|------------------------------|----------------------------|---------------------|--------------------------|----------------------------|-----------|-------------|
| Mean Phenotype      | Ca       | 1   | 1,683,482  | 1.05E-08       | Whole Panel     | 0.40 | 1.92%                     | 1.43                         | 1.93                       | Low                 |                          |                            |           |             |
| Mean Phenotype      | Ca       | 5   | 3,646,613  | 1.49E-08       | Whole Panel     | 0.47 | 0.00%                     | 3.58                         | 3.78                       | Low                 |                          |                            |           |             |
| Mean Phenotype      | Ca       | 11  | 1,029,853  | 1.09E-08       | Whole Panel     | 0.08 | 7.11%                     | 0.94                         | 1.14                       | High                |                          |                            |           |             |
| Mean Phenotype      | Cd       | 1   | 795,990    | 7.33E-10       | Whole Panel     | 0.42 | 16.89%                    | 0.55                         | 1.05                       | High                |                          |                            | q         |             |
| Mean Phenotype      | Cd       | 4   | 33,879,941 | 7.67E-11       | <i>Indica</i>   | 0.06 | 5.92%                     | 33.78                        | 33.98                      | Low                 |                          |                            |           |             |
| Mean Phenotype      | Cd       | 5   | 7,349,022  | 7.79E-09       | Whole Panel     | 0.43 | 4.75%                     | 7.10                         | 7.60                       | High                |                          |                            | q         |             |
| Mean Phenotype      | Cd       | 7   | 7,473,929  | 7.12E-17       | <i>Indica</i>   | 0.10 | 18.73%                    | 7.22                         | 7.72                       | High                |                          |                            | g         | <i>HMA3</i> |
| Mean Phenotype      | Cd       | 7   | 8,430,087  | 6.01E-13       | Whole Panel     | 0.47 | 16.89%                    | 8.18                         | 8.68                       | High                |                          | Y                          | a         |             |
| Mean Phenotype      | Cd       | 7   | 10,293,897 | 3.94E-16       | Whole Panel     | 0.10 | 0.07%                     | 10.04                        | 10.54                      | Low                 |                          |                            |           |             |
| Mean Phenotype      | Cd       | 7   | 16,637,858 | 9.99E-09       | Whole Panel     | 0.34 | 11.89%                    | 16.39                        | 16.89                      | High                |                          |                            |           |             |
| Mean Phenotype      | Cd       | 8   | 8,735,225  | 4.28E-09       | Whole Panel     | 0.32 | 0.09%                     | 8.64                         | 8.84                       | Low                 |                          |                            |           |             |
| Mean Phenotype      | Cd       | 9   | 6,130,081  | 2.50E-10       | <i>Indica</i>   | 0.37 | 20.38%                    | 6.03                         | 6.23                       | Low                 | Y                        | Y                          |           |             |
| Mean Phenotype      | Cd       | 9   | 6,130,081  | 3.08E-09       | Whole Panel     | 0.21 | 0.01%                     | 6.12                         | 6.56                       | Low                 | Y                        | Y                          |           |             |
| Mean Phenotype      | Cd       | 10  | 280,882    | 1.73E-08       | Whole Panel     | 0.08 | 0.00%                     | 0.19                         | 0.39                       | High                |                          |                            |           |             |
| Mean Phenotype      | Cd       | 11  | 2,446,720  | 1.76E-12       | <i>Indica</i>   | 0.34 | 0.11%                     | 2.33                         | 2.53                       | Low                 |                          |                            |           | <i>ENAI</i> |
| Mean Phenotype      | Cd       | 11  | 10,244,670 | 1.18E-10       | Whole Panel     | 0.26 | 0.77%                     | 9.99                         | 10.49                      | Low                 |                          |                            |           |             |
| Mean Phenotype      | Cd       | 11  | 24,068,075 | 6.76E-09       | Whole Panel     | 0.41 | 2.25%                     | 23.86                        | 24.29                      | Low                 |                          |                            | q         |             |
| Mean Phenotype      | Cd       | 11  | 28,454,193 | 9.67E-09       | <i>Indica</i>   | 0.24 | 20.38%                    | 28.09                        | 28.49                      | Low                 |                          |                            |           |             |
| Mean Phenotype      | Cr       | 3   | 17,957,999 | 1.07E-08       | <i>Japonica</i> | 0.07 | 10.33%                    | 17.86                        | 18.06                      | Low                 |                          |                            |           |             |
| Mean Phenotype      | Cr       | 7   | 4,921,009  | 7.15E-10       | <i>Japonica</i> | 0.47 | 10.33%                    | 4.67                         | 5.17                       | Low                 |                          |                            |           |             |
| Mean Phenotype      | Cr       | 11  | 6,584,782  | 7.76E-10       | <i>Japonica</i> | 0.15 | 10.33%                    | 6.48                         | 6.68                       | Low                 |                          |                            |           |             |
| Mean Phenotype      | Cr       | 12  | 17,801,781 | 1.29E-08       | <i>Japonica</i> | 0.14 | 10.33%                    | 17.58                        | 17.92                      | High                |                          |                            |           |             |
| Mean Phenotype      | Cu       | 1   | 35,202,111 | 6.87E-12       | <i>Japonica</i> | 0.29 | 11.60%                    | 34.98                        | 35.22                      | Low                 |                          |                            | k,m       |             |
| Mean Phenotype      | Cu       | 2   | 31,630,506 | 1.13E-08       | Whole Panel     | 0.44 | 2.89%                     | 31.38                        | 31.88                      | Low                 |                          |                            |           |             |
| Mean Phenotype      | Cu       | 3   | 15,448,987 | 2.53E-08       | <i>Japonica</i> | 0.10 | 5.26%                     | 15.34                        | 15.54                      | High                |                          |                            |           |             |
| Mean Phenotype      | Cu       | 6   | 19,265,035 | 2.95E-10       | Whole Panel     | 0.06 | 2.89%                     | 19.02                        | 19.52                      | High                |                          |                            | k         |             |
| Mean Phenotype      | Cu       | 8   | 8,788,169  | 1.29E-10       | Whole Panel     | 0.33 | 2.82%                     | 8.54                         | 9.04                       | Low                 |                          |                            | i,m       |             |
| Mean Phenotype      | Cu       | 11  | 2,434,306  | 8.74E-12       | Whole Panel     | 0.20 | 0.44%                     | 2.22                         | 2.48                       | High                |                          |                            | m         | <i>ENAI</i> |
| Mean Phenotype      | Cu       | 11  | 6,159,144  | 1.56E-10       | <i>Japonica</i> | 0.05 | 11.60%                    | 6.06                         | 6.26                       | High                |                          |                            | r         |             |
| Mean Phenotype      | Cu       | 11  | 20,514,087 | 2.19E-10       | <i>Japonica</i> | 0.43 | 1.87%                     | 20.41                        | 20.61                      | Low                 |                          |                            |           |             |
| Mean Phenotype      | Fe       | 4   | 802,734    | 1.04E-14       | Whole Panel     | 0.08 | 12.90%                    | 0.69                         | 0.97                       | High                |                          |                            |           |             |

| Phenotypic Measures | Elements | Chr | Pos        | P.value (GWAS) | Panel           | MAF  | PVE (Phenotypic measures) | Significant Region Start(Mb) | Significant Region End(Mb) | Allele Effect (Nip) | Overlap (Between Panels) | Overlap (Between Measures) | Reference | Genes |
|---------------------|----------|-----|------------|----------------|-----------------|------|---------------------------|------------------------------|----------------------------|---------------------|--------------------------|----------------------------|-----------|-------|
| Mean Phenotype      | Fe       | 5   | 5,835,605  | 1.30E-13       | Whole Panel     | 0.24 | 12.90%                    | 5.72                         | 5.92                       | Low                 |                          |                            |           |       |
| Mean Phenotype      | Fe       | 5   | 27,539,473 | 6.88E-09       | Whole Panel     | 0.08 | 9.22%                     | 27.45                        | 27.65                      | High                |                          |                            |           |       |
| Mean Phenotype      | Fe       | 8   | 2,797,478  | 1.89E-14       | Whole Panel     | 0.32 | 8.73%                     | 2.72                         | 2.92                       | Low                 |                          |                            |           |       |
| Mean Phenotype      | Fe       | 8   | 8,506,328  | 4.15E-08       | <i>Japonica</i> | 0.07 | 13.70%                    | 8.41                         | 8.61                       | High                |                          |                            | r         |       |
| Mean Phenotype      | Fe       | 8   | 20,439,074 | 2.06E-09       | Whole Panel     | 0.09 | 5.87%                     | 20.33                        | 20.53                      | High                |                          |                            |           |       |
| Mean Phenotype      | Fe       | 11  | 13,583,539 | 4.37E-08       | <i>Japonica</i> | 0.07 | 2.85%                     | 13.48                        | 13.68                      | Low                 |                          |                            |           |       |
| Mean Phenotype      | Fe       | 11  | 16,231,792 | 8.31E-19       | <i>Japonica</i> | 0.07 | 14.50%                    | 16.13                        | 16.33                      | High                |                          |                            |           |       |
| Mean Phenotype      | Fe       | 12  | 2,197,415  | 3.21E-12       | <i>Japonica</i> | 0.27 | 3.65%                     | 2.09                         | 2.29                       | High                |                          |                            | j         |       |
| Mean Phenotype      | K        | 3   | 33,239,260 | 2.74E-08       | <i>Indica</i>   | 0.11 | 11.87%                    | 32.99                        | 33.49                      | Low                 |                          |                            |           |       |
| Mean Phenotype      | K        | 6   | 1,792,792  | 6.96E-14       | <i>Indica</i>   | 0.48 | 2.19%                     | 1.54                         | 2.04                       | Low                 | Y                        |                            | d,o,q     |       |
| Mean Phenotype      | K        | 6   | 1,792,792  | 5.90E-13       | Whole Panel     | 0.31 | 0.01%                     | 1.54                         | 2.04                       | Low                 | Y                        |                            | d,o,q     |       |
| Mean Phenotype      | K        | 6   | 11,125,709 | 9.66E-10       | Whole Panel     | 0.11 | 20.42%                    | 11.03                        | 11.23                      | High                |                          |                            |           |       |
| Mean Phenotype      | K        | 6   | 18,141,616 | 2.01E-08       | <i>Japonica</i> | 0.17 | 11.87%                    | 17.89                        | 18.39                      | High                |                          |                            | o         |       |
| Mean Phenotype      | K        | 7   | 13,556,162 | 9.38E-09       | Whole Panel     | 0.29 | 3.47%                     | 13.31                        | 13.81                      | High                |                          |                            |           |       |
| Mean Phenotype      | K        | 8   | 8,820,787  | 2.11E-10       | <i>Indica</i>   | 0.19 | 18.55%                    | 8.73                         | 8.93                       | Low                 |                          |                            |           |       |
| Mean Phenotype      | K        | 9   | 21,115,786 | 1.55E-15       | Whole Panel     | 0.17 | 12.65%                    | 20.91                        | 21.24                      | High                |                          |                            | b,n       |       |
| Mean Phenotype      | Mg       | 1   | 27,525,475 | 6.25E-09       | <i>Indica</i>   | 0.13 | 0.11%                     | 27.43                        | 27.63                      | High                |                          |                            |           |       |
| Mean Phenotype      | Mg       | 1   | 36,346,000 | 1.38E-08       | Whole Panel     | 0.16 | 9.06%                     | 36.30                        | 36.50                      | Low                 |                          |                            |           |       |
| Mean Phenotype      | Mg       | 2   | 12,199,639 | 1.17E-10       | <i>Japonica</i> | 0.33 | 10.83%                    | 12.13                        | 12.33                      | Low                 |                          |                            |           |       |
| Mean Phenotype      | Mg       | 2   | 14,212,780 | 4.68E-12       | <i>Japonica</i> | 0.05 | 16.38%                    | 13.96                        | 14.46                      | High                |                          |                            |           |       |
| Mean Phenotype      | Mg       | 3   | 33,203,042 | 6.58E-16       | <i>Indica</i>   | 0.11 | 15.63%                    | 32.98                        | 33.34                      | Low                 |                          |                            | n         |       |
| Mean Phenotype      | Mg       | 6   | 8,819,531  | 2.73E-10       | Whole Panel     | 0.12 | 9.10%                     | 8.57                         | 9.07                       | High                |                          |                            |           |       |
| Mean Phenotype      | Mg       | 6   | 12,292,040 | 5.59E-13       | <i>Indica</i>   | 0.22 | 7.41%                     | 12.14                        | 12.34                      | Low                 |                          |                            |           |       |
| Mean Phenotype      | Mg       | 6   | 24,560,232 | 3.61E-09       | <i>Indica</i>   | 0.22 | 2.76%                     | 24.46                        | 24.66                      | Low                 |                          |                            | r         |       |
| Mean Phenotype      | Mg       | 7   | 497,481    | 2.39E-09       | Whole Panel     | 0.12 | 3.42%                     | 0.40                         | 0.60                       | High                |                          |                            |           |       |
| Mean Phenotype      | Mg       | 7   | 9,836,660  | 6.09E-11       | Whole Panel     | 0.13 | 17.50%                    | 9.59                         | 10.09                      | High                |                          |                            |           |       |
| Mean Phenotype      | Mg       | 7   | 25,313,250 | 2.67E-09       | Whole Panel     | 0.06 | 0.97%                     | 25.11                        | 25.32                      | High                |                          |                            |           |       |
| Mean Phenotype      | Mg       | 9   | 15,773,490 | 4.39E-13       | <i>Indica</i>   | 0.31 | 5.92%                     | 15.35                        | 15.80                      | High                |                          |                            | b         |       |
| Mean Phenotype      | Mg       | 10  | 20,599,205 | 7.23E-14       | <i>Japonica</i> | 0.06 | 7.24%                     | 20.19                        | 20.67                      | Low                 |                          |                            |           |       |
| Mean Phenotype      | Mg       | 11  | 19,813,409 | 5.20E-10       | Whole Panel     | 0.10 | 15.78%                    | 19.71                        | 19.91                      | High                |                          |                            |           |       |
| Mean Phenotype      | Mg       | 11  | 25,804,573 | 1.47E-08       | Whole Panel     | 0.11 | 0.35%                     | 25.55                        | 25.90                      | Low                 |                          |                            |           |       |
| Mean Phenotype      | Mg       | 11  | 26,819,570 | 1.18E-10       | Whole Panel     | 0.46 | 18.74%                    | 26.73                        | 26.93                      | High                | Y                        |                            |           |       |

| Phenotypic Measures | Elements | Chr | Pos        | P.value (GWAS) | Panel           | MAF  | PVE (Phenotypic measures) | Significant Region Start(Mb) | Significant Region End(Mb) | Allele Effect (Nip) | Overlap (Between Panels) | Overlap (Between Measures) | Reference | Genes |
|---------------------|----------|-----|------------|----------------|-----------------|------|---------------------------|------------------------------|----------------------------|---------------------|--------------------------|----------------------------|-----------|-------|
| Mean Phenotype      | Mg       | 11  | 26,965,337 | 1.90E-09       | <i>Indica</i>   | 0.44 | 15.79%                    | 26.72                        | 27.22                      | High                | Y                        |                            |           |       |
| Mean Phenotype      | Mg       | 12  | 2,240,721  | 1.16E-10       | Whole Panel     | 0.36 | 2.25%                     | 1.99                         | 2.49                       | Low                 |                          |                            | r         |       |
| Mean Phenotype      | Mg       | 12  | 27,065,837 | 3.77E-10       | <i>Indica</i>   | 0.26 | 0.71%                     | 26.97                        | 27.17                      | High                |                          |                            |           |       |
| Mean Phenotype      | Mn       | 3   | 8,642,556  | 1.13E-08       | Whole Panel     | 0.18 | 2.94%                     | 8.39                         | 8.89                       | High                |                          |                            |           |       |
| Mean Phenotype      | Mn       | 4   | 904,276    | 1.07E-09       | Whole Panel     | 0.32 | 2.94%                     | 0.65                         | 1.15                       | Low                 |                          |                            |           |       |
| Mean Phenotype      | Mn       | 5   | 27,900,026 | 1.04E-08       | <i>Indica</i>   | 0.35 | 0.91%                     | 27.84                        | 28.16                      | High                |                          |                            | i         |       |
| Mean Phenotype      | Mn       | 5   | 29,360,515 | 6.15E-09       | <i>Indica</i>   | 0.08 | 0.91%                     | 29.21                        | 29.45                      | High                |                          |                            |           |       |
| Mean Phenotype      | Mn       | 9   | 21,541,460 | 1.04E-08       | Whole Panel     | 0.25 | 1.01%                     | 21.36                        | 21.56                      | Low                 |                          |                            |           |       |
| Mean Phenotype      | Mn       | 11  | 8,513,929  | 2.33E-10       | Whole Panel     | 0.24 | 0.31%                     | 8.26                         | 8.76                       | High                |                          |                            | o         |       |
| Mean Phenotype      | Mn       | 11  | 17,899,745 | 1.83E-13       | Whole Panel     | 0.22 | 2.94%                     | 17.75                        | 17.95                      | High                | Y                        |                            |           |       |
| Mean Phenotype      | Mn       | 11  | 17,941,309 | 1.28E-08       | <i>Indica</i>   | 0.15 | 0.91%                     | 17.69                        | 18.19                      | High                | Y                        |                            |           |       |
| Mean Phenotype      | Mn       | 11  | 20,854,832 | 2.57E-08       | <i>Indica</i>   | 0.20 | 0.91%                     | 20.84                        | 21.05                      | High                | Y                        |                            | r         |       |
| Mean Phenotype      | Mn       | 11  | 21,138,486 | 1.78E-08       | Whole Panel     | 0.07 | 2.94%                     | 20.89                        | 21.15                      | High                | Y                        |                            | k,r       |       |
| Mean Phenotype      | Ni       | 1   | 21,156,160 | 1.25E-09       | Whole Panel     | 0.09 | 12.41%                    | 20.91                        | 21.41                      | Low                 |                          |                            |           |       |
| Mean Phenotype      | Ni       | 3   | 15,514,427 | 4.33E-11       | Whole Panel     | 0.31 | 11.73%                    | 15.42                        | 15.62                      | High                |                          |                            |           |       |
| Mean Phenotype      | Ni       | 4   | 26,107,854 | 1.72E-08       | <i>Japonica</i> | 0.09 | 8.28%                     | 25.86                        | 26.36                      | High                |                          |                            |           |       |
| Mean Phenotype      | Ni       | 6   | 26,674,937 | 1.05E-09       | Whole Panel     | 0.49 | 15.03%                    | 26.42                        | 26.92                      | Low                 |                          |                            |           |       |
| Mean Phenotype      | Ni       | 8   | 5,567,280  | 2.65E-08       | <i>Indica</i>   | 0.07 | 10.52%                    | 5.46                         | 5.66                       | High                |                          |                            |           |       |
| Mean Phenotype      | Ni       | 9   | 14,238,893 | 5.66E-09       | Whole Panel     | 0.10 | 14.92%                    | 14.16                        | 14.48                      | High                |                          |                            |           |       |
| Mean Phenotype      | P        | 2   | 12,199,639 | 4.63E-10       | Whole Panel     | 0.28 | 15.43%                    | 11.95                        | 12.45                      | Low                 | Y                        |                            |           |       |
| Mean Phenotype      | P        | 2   | 12,199,639 | 2.55E-14       | <i>Japonica</i> | 0.33 | 3.39%                     | 12.13                        | 12.33                      | Low                 | Y                        |                            |           |       |
| Mean Phenotype      | P        | 2   | 29,123,952 | 2.16E-08       | <i>Indica</i>   | 0.12 | 0.26%                     | 29.00                        | 29.34                      | High                |                          |                            | o,r       |       |
| Mean Phenotype      | P        | 4   | 13,505,438 | 1.75E-12       | <i>Indica</i>   | 0.19 | 20.05%                    | 13.47                        | 13.81                      | High                |                          |                            |           |       |
| Mean Phenotype      | P        | 4   | 20,701,268 | 2.25E-11       | <i>Japonica</i> | 0.14 | 18.46%                    | 20.61                        | 20.81                      | High                |                          |                            |           |       |
| Mean Phenotype      | P        | 6   | 7,776,248  | 1.02E-09       | <i>Japonica</i> | 0.05 | 2.17%                     | 7.70                         | 7.90                       | High                |                          |                            |           |       |
| Mean Phenotype      | P        | 7   | 13,633,881 | 7.33E-17       | Whole Panel     | 0.10 | 16.02%                    | 13.38                        | 13.88                      | High                |                          |                            |           |       |
| Mean Phenotype      | P        | 7   | 20,394,327 | 2.14E-09       | Whole Panel     | 0.07 | 10.81%                    | 20.14                        | 20.64                      | High                |                          |                            |           |       |
| Mean Phenotype      | P        | 10  | 1,354,405  | 4.87E-09       | <i>Indica</i>   | 0.47 | 9.16%                     | 1.12                         | 1.40                       | Low                 |                          |                            |           |       |
| Mean Phenotype      | P        | 10  | 4,193,962  | 2.13E-09       | Whole Panel     | 0.27 | 0.79%                     | 3.94                         | 4.44                       | High                |                          |                            |           |       |
| Mean Phenotype      | P        | 10  | 17,950,353 | 2.38E-11       | Whole Panel     | 0.09 | 0.04%                     | 17.70                        | 18.20                      | Low                 |                          |                            |           |       |
| Mean Phenotype      | P        | 11  | 19,813,393 | 3.38E-10       | <i>Japonica</i> | 0.45 | 16.40%                    | 19.71                        | 19.91                      | High                |                          |                            |           |       |
| Mean Phenotype      | P        | 11  | 20,938,745 | 4.16E-08       | <i>Japonica</i> | 0.15 | 0.06%                     | 20.69                        | 21.19                      | High                |                          |                            |           |       |



| Phenotypic Measures | Elements | Chr | Pos        | P.value (GWAS) | Panel           | MAF  | PVE (Phenotypic measures) | Significant Region Start(Mb) | Significant Region End(Mb) | Allele Effect (Nip) | Overlap (Between Panels) | Overlap (Between Measures) | Reference | Genes        |
|---------------------|----------|-----|------------|----------------|-----------------|------|---------------------------|------------------------------|----------------------------|---------------------|--------------------------|----------------------------|-----------|--------------|
| Mean Phenotype      | P        | 11  | 28,129,959 | 2.17E-16       | <i>Indica</i>   | 0.10 | 20.05%                    | 27.88                        | 28.38                      | High                |                          | Y                          |           |              |
| Mean Phenotype      | P        | 11  | 28,743,343 | 6.81E-10       | Whole Panel     | 0.09 | 16.72%                    | 28.49                        | 28.99                      | High                |                          | Y                          |           |              |
| Mean Phenotype      | P        | 12  | 8,928,232  | 8.15E-18       | <i>Indica</i>   | 0.44 | 5.92%                     | 8.68                         | 9.18                       | High                |                          |                            |           |              |
| Mean Phenotype      | P        | 12  | 12,162,328 | 2.74E-08       | <i>Indica</i>   | 0.10 | 9.90%                     | 12.06                        | 12.26                      | Low                 |                          |                            |           |              |
| Mean Phenotype      | S        | 1   | 3,085,472  | 4.17E-09       | Whole Panel     | 0.22 | 0.61%                     | 2.84                         | 3.34                       | High                | Y                        |                            |           |              |
| Mean Phenotype      | S        | 1   | 3,095,195  | 1.53E-14       | <i>Japonica</i> | 0.38 | 12.44%                    | 2.85                         | 3.35                       | Low                 | Y                        |                            |           |              |
| Mean Phenotype      | S        | 1   | 4,193,983  | 1.36E-13       | <i>Indica</i>   | 0.06 | 16.56%                    | 4.10                         | 4.30                       | Low                 |                          |                            |           |              |
| Mean Phenotype      | S        | 1   | 29,781,448 | 5.61E-12       | Whole Panel     | 0.18 | 3.40%                     | 29.68                        | 29.88                      | High                |                          |                            | r         |              |
| Mean Phenotype      | S        | 3   | 7,617,517  | 6.50E-09       | Whole Panel     | 0.12 | 3.40%                     | 7.37                         | 7.87                       | Low                 |                          |                            |           |              |
| Mean Phenotype      | S        | 3   | 29,032,123 | 2.28E-09       | Whole Panel     | 0.19 | 0.27%                     | 28.78                        | 29.28                      | Low                 |                          |                            | r         |              |
| Mean Phenotype      | S        | 5   | 8,221,364  | 1.34E-11       | Whole Panel     | 0.27 | 3.40%                     | 7.97                         | 8.47                       | High                | Y                        |                            |           |              |
| Mean Phenotype      | S        | 5   | 8,334,198  | 3.04E-09       | <i>Indica</i>   | 0.22 | 6.15%                     | 8.23                         | 8.43                       | Low                 | Y                        |                            |           |              |
| Mean Phenotype      | S        | 5   | 23,266,629 | 1.64E-08       | Whole Panel     | 0.41 | 0.87%                     | 23.02                        | 23.52                      | High                |                          |                            |           |              |
| Mean Phenotype      | S        | 5   | 24,441,905 | 5.37E-13       | <i>Indica</i>   | 0.16 | 0.23%                     | 24.19                        | 24.69                      | Low                 |                          |                            |           |              |
| Mean Phenotype      | S        | 6   | 7,210,104  | 1.11E-09       | Whole Panel     | 0.30 | 3.40%                     | 6.96                         | 7.46                       | High                |                          |                            |           |              |
| Mean Phenotype      | S        | 6   | 8,879,934  | 4.97E-08       | <i>Japonica</i> | 0.08 | 12.44%                    | 8.85                         | 9.05                       | High                | Y                        |                            |           |              |
| Mean Phenotype      | S        | 6   | 9,035,697  | 2.08E-09       | Whole Panel     | 0.28 | 3.40%                     | 8.79                         | 9.29                       | Low                 | Y                        |                            |           |              |
| Mean Phenotype      | S        | 7   | 2,235,815  | 1.38E-08       | <i>Japonica</i> | 0.18 | 8.75%                     | 2.14                         | 2.34                       | High                |                          |                            |           |              |
| Mean Phenotype      | S        | 7   | 4,562,470  | 1.67E-08       | <i>Indica</i>   | 0.35 | 15.85%                    | 4.46                         | 4.66                       | High                |                          |                            |           |              |
| Mean Phenotype      | S        | 7   | 17,156,503 | 2.28E-09       | Whole Panel     | 0.40 | 0.02%                     | 16.91                        | 17.41                      | High                |                          |                            | r         |              |
| Mean Phenotype      | S        | 8   | 7,825,922  | 1.37E-08       | <i>Indica</i>   | 0.13 | 8.62%                     | 7.73                         | 7.93                       | High                |                          |                            |           |              |
| Mean Phenotype      | S        | 9   | 20,009,713 | 1.20E-08       | <i>Japonica</i> | 0.13 | 6.70%                     | 19.90                        | 20.21                      | High                |                          |                            | r         |              |
| Mean Phenotype      | S        | 11  | 25,049,208 | 3.89E-08       | <i>Japonica</i> | 0.26 | 0.40%                     | 24.86                        | 25.17                      | Low                 |                          |                            |           |              |
| Mean Phenotype      | S        | 11  | 26,963,127 | 2.33E-19       | <i>Indica</i>   | 0.30 | 18.68%                    | 26.71                        | 27.21                      | High                | Y                        |                            |           |              |
| Mean Phenotype      | S        | 11  | 26,963,127 | 2.29E-13       | Whole Panel     | 0.16 | 3.40%                     | 26.71                        | 27.21                      | High                | Y                        |                            |           |              |
| Mean Phenotype      | S        | 12  | 16,565,856 | 7.42E-10       | Whole Panel     | 0.44 | 3.40%                     | 16.32                        | 16.82                      | High                |                          |                            |           |              |
| Mean Phenotype      | S        | 12  | 21,536,923 | 1.30E-09       | <i>Indica</i>   | 0.13 | 9.44%                     | 21.44                        | 21.64                      | High                |                          |                            |           |              |
| Mean Phenotype      | Se       | 1   | 23,589,633 | 1.03E-08       | Whole Panel     | 0.06 | 16.10%                    | 23.30                        | 23.64                      | High                |                          |                            |           |              |
| Mean Phenotype      | Zn       | 2   | 29,834,911 | 5.87E-17       | <i>Indica</i>   | 0.07 | 14.76%                    | 29.76                        | 29.96                      | Low                 |                          |                            | c,p,r     |              |
| Mean Phenotype      | Zn       | 2   | 34,966,943 | 5.15E-09       | <i>Indica</i>   | 0.42 | 0.01%                     | 34.84                        | 35.04                      | Low                 |                          |                            |           |              |
| Mean Phenotype      | Zn       | 3   | 7,371,940  | 1.44E-08       | <i>Japonica</i> | 0.28 | 7.61%                     | 7.12                         | 7.62                       | Low                 |                          |                            |           | <i>DMASI</i> |
| Mean Phenotype      | Zn       | 3   | 9,205,841  | 2.20E-08       | <i>Japonica</i> | 0.08 | 7.61%                     | 9.08                         | 9.28                       | High                |                          |                            |           |              |

| Phenotypic Measures | Elements | Chr | Pos        | P.value (GWAS) | Panel           | MAF  | PVE (Phenotypic measures) | Significant Region Start(Mb) | Significant Region End(Mb) | Allele Effect (Nip) | Overlap (Between Panels) | Overlap (Between Measures) | Reference | Genes         |
|---------------------|----------|-----|------------|----------------|-----------------|------|---------------------------|------------------------------|----------------------------|---------------------|--------------------------|----------------------------|-----------|---------------|
| Mean Phenotype      | Zn       | 3   | 11,205,562 | 5.17E-08       | <i>Japonica</i> | 0.16 | 7.61%                     | 11.08                        | 11.28                      | Low                 |                          |                            | j,n       |               |
| Mean Phenotype      | Zn       | 3   | 29,335,674 | 3.94E-09       | <i>Indica</i>   | 0.46 | 11.19%                    | 29.31                        | 29.65                      | Low                 |                          |                            |           |               |
| Mean Phenotype      | Zn       | 4   | 33,597,164 | 1.68E-08       | Whole Panel     | 0.25 | 14.91%                    | 33.49                        | 33.69                      | Low                 |                          |                            | m         |               |
| Mean Phenotype      | Zn       | 8   | 20,686,031 | 2.70E-08       | <i>Indica</i>   | 0.06 | 12.16%                    | 20.65                        | 20.99                      | High                |                          |                            | d,n       |               |
| Mean Phenotype      | Zn       | 12  | 103,541    | 4.67E-09       | <i>Indica</i>   | 0.12 | 2.78%                     | -0.15                        | 0.35                       | High                |                          |                            |           |               |
| Mean Phenotype      | Zn       | 12  | 15,809,441 | 5.00E-10       | <i>Indica</i>   | 0.47 | 0.24%                     | 15.56                        | 16.06                      | High                |                          |                            |           |               |
| Linear Plasticity   | Ca       | 2   | 7,939,328  | 1.71E-08       | <i>Indica</i>   | 0.08 | 1.10%                     | 7.84                         | 8.04                       | Low                 |                          |                            | d         |               |
| Linear Plasticity   | Ca       | 2   | 14,724,782 | 9.49E-09       | <i>Indica</i>   | 0.07 | 1.10%                     | 14.62                        | 14.82                      | Low                 |                          |                            |           |               |
| Linear Plasticity   | Ca       | 2   | 25,151,605 | 1.72E-08       | <i>Indica</i>   | 0.18 | 1.10%                     | 24.90                        | 25.40                      | Low                 |                          |                            |           |               |
| Linear Plasticity   | Ca       | 12  | 770,389    | 7.07E-09       | <i>Indica</i>   | 0.05 | 1.10%                     | 0.67                         | 0.87                       | Low                 |                          |                            |           |               |
| Linear Plasticity   | Cd       | 2   | 25,113,972 | 1.64E-09       | <i>Indica</i>   | 0.26 | 4.62%                     | 24.86                        | 25.36                      | Low                 |                          |                            | q         | <i>CAL</i>    |
| Linear Plasticity   | Cd       | 5   | 23,479,652 | 8.00E-11       | <i>Indica</i>   | 0.20 | 5.17%                     | 23.29                        | 23.49                      | Low                 |                          |                            |           |               |
| Linear Plasticity   | Cd       | 5   | 29,749,551 | 8.44E-11       | <i>Indica</i>   | 0.19 | 5.99%                     | 29.65                        | 29.85                      | Low                 |                          |                            |           |               |
| Linear Plasticity   | Cd       | 6   | 8,556,505  | 4.55E-09       | Whole Panel     | 0.50 | 8.78%                     | 8.31                         | 8.81                       | High                |                          |                            |           |               |
| Linear Plasticity   | Cd       | 7   | 6,967,567  | 4.91E-20       | <i>Indica</i>   | 0.14 | 14.04%                    | 6.72                         | 7.22                       | High                |                          |                            | a,g,r     |               |
| Linear Plasticity   | Cd       | 7   | 8,311,571  | 2.19E-16       | Whole Panel     | 0.43 | 7.20%                     | 8.06                         | 8.56                       | High                |                          | Y                          | a         |               |
| Linear Plasticity   | Cd       | 7   | 9,161,046  | 9.63E-10       | <i>Indica</i>   | 0.49 | 14.04%                    | 8.90                         | 9.35                       | High                |                          |                            | q,r       | <i>NRAMP1</i> |
| Linear Plasticity   | Cd       | 8   | 19,262,502 | 5.41E-10       | <i>Japonica</i> | 0.20 | 11.15%                    | 19.19                        | 19.39                      | High                |                          |                            |           |               |
| Linear Plasticity   | Cd       | 8   | 21,150,062 | 6.25E-11       | <i>Indica</i>   | 0.06 | 9.37%                     | 21.09                        | 21.32                      | Low                 |                          |                            | r         |               |
| Linear Plasticity   | Cd       | 8   | 26,913,733 | 9.74E-09       | Whole Panel     | 0.14 | 8.78%                     | 26.79                        | 26.99                      | High                | Y                        |                            | q         |               |
| Linear Plasticity   | Cd       | 8   | 26,968,333 | 3.77E-10       | <i>Indica</i>   | 0.08 | 3.66%                     | 26.94                        | 27.18                      | High                | Y                        |                            | q         |               |
| Linear Plasticity   | Cd       | 9   | 6,131,885  | 2.44E-08       | <i>Indica</i>   | 0.17 | 14.04%                    | 6.03                         | 6.23                       | High                |                          | Y                          |           |               |
| Linear Plasticity   | Cd       | 9   | 8,983,294  | 1.68E-09       | Whole Panel     | 0.28 | 7.20%                     | 8.73                         | 9.23                       | High                |                          |                            |           |               |
| Linear Plasticity   | Cd       | 12  | 12,985,244 | 4.46E-11       | Whole Panel     | 0.05 | 8.78%                     | 12.89                        | 13.09                      | High                |                          |                            | q         |               |
| Linear Plasticity   | Cr       | 1   | 16,099,387 | 3.45E-10       | Whole Panel     | 0.42 | 0.78%                     | 15.85                        | 16.35                      | High                |                          |                            |           |               |
| Linear Plasticity   | Cr       | 1   | 18,056,466 | 9.34E-10       | <i>Indica</i>   | 0.32 | 3.59%                     | 17.81                        | 18.31                      | High                |                          |                            |           |               |
| Linear Plasticity   | Cr       | 2   | 16,307,502 | 4.32E-13       | <i>Indica</i>   | 0.08 | 3.59%                     | 16.25                        | 16.69                      | High                |                          |                            |           |               |
| Linear Plasticity   | Cr       | 4   | 2,542,125  | 9.28E-09       | <i>Indica</i>   | 0.16 | 3.59%                     | 2.44                         | 2.64                       | High                |                          |                            |           |               |
| Linear Plasticity   | Cr       | 4   | 14,599,445 | 9.15E-11       | <i>Japonica</i> | 0.08 | 12.97%                    | 14.50                        | 14.70                      | High                |                          |                            |           |               |
| Linear Plasticity   | Cr       | 5   | 6,188,177  | 6.36E-12       | Whole Panel     | 0.17 | 0.29%                     | 6.05                         | 6.36                       | Low                 |                          |                            |           |               |
| Linear Plasticity   | Cr       | 6   | 24,059,277 | 1.20E-09       | Whole Panel     | 0.40 | 2.18%                     | 23.81                        | 24.31                      | Low                 |                          |                            |           |               |
| Linear Plasticity   | Cr       | 7   | 367,318    | 1.29E-11       | Whole Panel     | 0.28 | 0.02%                     | 0.12                         | 0.62                       | High                |                          |                            |           |               |

| Phenotypic Measures | Elements | Chr | Pos        | P.value (GWAS) | Panel           | MAF  | PVE (Phenotypic measures) | Significant Region Start(Mb) | Significant Region End(Mb) | Allele Effect (Nip) | Overlap (Between Panels) | Overlap (Between Measures) | Reference | Genes |
|---------------------|----------|-----|------------|----------------|-----------------|------|---------------------------|------------------------------|----------------------------|---------------------|--------------------------|----------------------------|-----------|-------|
| Linear Plasticity   | Cr       | 7   | 11,996,735 | 1.18E-12       | Whole Panel     | 0.28 | 21.59%                    | 11.75                        | 12.25                      | Low                 | Y                        |                            |           |       |
| Linear Plasticity   | Cr       | 7   | 11,997,353 | 9.34E-12       | <i>Japonica</i> | 0.37 | 12.97%                    | 11.75                        | 12.25                      | Low                 | Y                        |                            |           |       |
| Linear Plasticity   | Cr       | 9   | 2,275,721  | 4.52E-09       | <i>Indica</i>   | 0.15 | 0.24%                     | 2.18                         | 2.38                       | High                |                          |                            |           |       |
| Linear Plasticity   | Cr       | 10  | 8,553,984  | 7.77E-09       | <i>Indica</i>   | 0.11 | 3.59%                     | 8.45                         | 8.65                       | High                |                          |                            |           |       |
| Linear Plasticity   | Cr       | 12  | 23,375,323 | 1.22E-08       | Whole Panel     | 0.09 | 0.60%                     | 23.31                        | 23.51                      | Low                 |                          |                            |           |       |
| Linear Plasticity   | Cu       | 1   | 27,503,457 | 8.89E-09       | Whole Panel     | 0.50 | 2.11%                     | 27.25                        | 27.75                      | Low                 |                          |                            | d,m       |       |
| Linear Plasticity   | Cu       | 2   | 13,521,478 | 2.06E-09       | <i>Japonica</i> | 0.41 | 4.04%                     | 13.27                        | 13.77                      | Low                 |                          |                            |           |       |
| Linear Plasticity   | Cu       | 5   | 6,002,352  | 2.73E-09       | <i>Japonica</i> | 0.10 | 1.29%                     | 5.75                         | 6.25                       | Low                 |                          |                            |           |       |
| Linear Plasticity   | Cu       | 5   | 6,538,008  | 1.44E-10       | Whole Panel     | 0.10 | 12.35%                    | 6.34                         | 6.56                       | Low                 |                          |                            |           |       |
| Linear Plasticity   | Cu       | 6   | 11,184,487 | 4.41E-11       | <i>Japonica</i> | 0.09 | 1.33%                     | 11.13                        | 11.54                      | Low                 |                          |                            | k,m       |       |
| Linear Plasticity   | Cu       | 9   | 6,640,156  | 5.19E-10       | Whole Panel     | 0.27 | 14.53%                    | 6.58                         | 6.78                       | High                |                          |                            |           |       |
| Linear Plasticity   | Cu       | 9   | 9,787,327  | 2.12E-09       | <i>Japonica</i> | 0.05 | 12.00%                    | 9.54                         | 9.79                       | High                |                          |                            |           |       |
| Linear Plasticity   | Fe       | 1   | 4,957,933  | 7.18E-09       | Whole Panel     | 0.43 | 1.76%                     | 4.75                         | 4.98                       | Low                 |                          |                            |           |       |
| Linear Plasticity   | Fe       | 2   | 32,978,883 | 2.10E-14       | Whole Panel     | 0.39 | 0.07%                     | 32.73                        | 33.23                      | High                |                          |                            |           |       |
| Linear Plasticity   | Fe       | 4   | 26,495,979 | 2.31E-10       | Whole Panel     | 0.25 | 15.07%                    | 26.25                        | 26.75                      | Low                 |                          |                            |           |       |
| Linear Plasticity   | Fe       | 6   | 10,460,265 | 9.16E-09       | <i>Indica</i>   | 0.15 | 7.92%                     | 10.21                        | 10.71                      | Low                 |                          |                            | q         |       |
| Linear Plasticity   | K        | 1   | 21,861,259 | 1.41E-13       | Whole Panel     | 0.08 | 0.92%                     | 21.61                        | 22.11                      | Low                 |                          |                            | b         |       |
| Linear Plasticity   | K        | 1   | 33,555,927 | 3.80E-15       | Whole Panel     | 0.14 | 17.96%                    | 33.46                        | 33.66                      | Low                 | Y                        |                            |           |       |
| Linear Plasticity   | K        | 1   | 33,555,927 | 7.75E-19       | <i>Japonica</i> | 0.29 | 7.29%                     | 33.46                        | 33.66                      | Low                 | Y                        |                            |           |       |
| Linear Plasticity   | K        | 1   | 42,574,579 | 8.86E-09       | <i>Indica</i>   | 0.07 | 12.62%                    | 42.56                        | 42.86                      | Low                 |                          |                            |           |       |
| Linear Plasticity   | K        | 2   | 24,633,260 | 5.95E-10       | Whole Panel     | 0.25 | 0.04%                     | 24.52                        | 24.72                      | Low                 |                          |                            | n,r       |       |
| Linear Plasticity   | K        | 5   | 14,061,514 | 5.51E-09       | Whole Panel     | 0.09 | 2.29%                     | 13.81                        | 14.31                      | Low                 |                          |                            |           |       |
| Linear Plasticity   | K        | 7   | 17,406,472 | 4.97E-10       | Whole Panel     | 0.28 | 7.29%                     | 17.30                        | 17.50                      | High                |                          |                            |           |       |
| Linear Plasticity   | K        | 8   | 15,800,282 | 1.15E-08       | <i>Indica</i>   | 0.11 | 11.38%                    | 15.70                        | 15.90                      | High                |                          |                            | b         |       |
| Linear Plasticity   | K        | 8   | 21,211,932 | 6.68E-11       | Whole Panel     | 0.05 | 7.29%                     | 21.15                        | 21.35                      | High                |                          |                            |           |       |
| Linear Plasticity   | K        | 9   | 10,851,557 | 1.79E-08       | <i>Japonica</i> | 0.24 | 8.89%                     | 10.53                        | 11.02                      | High                |                          |                            | r         |       |
| Linear Plasticity   | K        | 11  | 19,598,306 | 4.47E-09       | Whole Panel     | 0.09 | 7.29%                     | 19.58                        | 19.89                      | High                |                          |                            |           |       |
| Linear Plasticity   | K        | 11  | 22,313,144 | 2.29E-08       | <i>Japonica</i> | 0.15 | 5.84%                     | 22.21                        | 22.41                      | Low                 |                          |                            |           |       |
| Linear Plasticity   | Mg       | 1   | 33,555,927 | 4.36E-12       | Whole Panel     | 0.14 | 9.74%                     | 33.46                        | 33.66                      | Low                 |                          |                            | k         |       |
| Linear Plasticity   | Mg       | 2   | 35,267,878 | 7.25E-10       | Whole Panel     | 0.42 | 9.74%                     | 35.16                        | 35.36                      | High                |                          |                            | r         |       |
| Linear Plasticity   | Mg       | 4   | 814,308    | 5.57E-11       | Whole Panel     | 0.11 | 9.74%                     | 0.56                         | 1.06                       | Low                 |                          |                            |           |       |
| Linear Plasticity   | Mg       | 4   | 16,008,180 | 7.58E-11       | Whole Panel     | 0.08 | 5.89%                     | 15.76                        | 16.26                      | Low                 |                          |                            | k         |       |

| Phenotypic Measures | Elements | Chr | Pos        | P.value (GWAS) | Panel           | MAF  | PVE (Phenotypic measures) | Significant Region Start(Mb) | Significant Region End(Mb) | Allele Effect (Nip) | Overlap (Between Panels) | Overlap (Between Measures) | Reference | Genes         |
|---------------------|----------|-----|------------|----------------|-----------------|------|---------------------------|------------------------------|----------------------------|---------------------|--------------------------|----------------------------|-----------|---------------|
| Linear Plasticity   | Mg       | 4   | 35,057,073 | 1.89E-10       | Whole Panel     | 0.09 | 9.74%                     | 34.94                        | 35.14                      | Low                 |                          |                            |           |               |
| Linear Plasticity   | Mg       | 7   | 29,065,923 | 6.64E-09       | <i>Japonica</i> | 0.43 | 13.97%                    | 29.05                        | 29.25                      | High                |                          | Y                          | r         |               |
| Linear Plasticity   | Mn       | 1   | 6,197,843  | 1.49E-08       | <i>Indica</i>   | 0.26 | 15.31%                    | 5.95                         | 6.45                       | Low                 |                          |                            | d,i,p     |               |
| Linear Plasticity   | Mn       | 3   | 5,797,006  | 9.93E-13       | <i>Japonica</i> | 0.18 | 17.03%                    | 5.55                         | 5.99                       | High                |                          | Y                          | d,r       |               |
| Linear Plasticity   | Mn       | 3   | 6,719,733  | 7.80E-10       | Whole Panel     | 0.17 | 7.54%                     | 6.57                         | 6.77                       | High                |                          |                            | i         | <i>MTP8.1</i> |
| Linear Plasticity   | Mn       | 6   | 6,637,497  | 3.40E-11       | Whole Panel     | 0.05 | 4.19%                     | 6.64                         | 7.11                       | Low                 |                          |                            |           |               |
| Linear Plasticity   | Mn       | 7   | 8,874,894  | 7.11E-14       | Whole Panel     | 0.19 | 7.54%                     | 8.62                         | 9.12                       | Low                 |                          |                            | d,i       | <i>NRAMP5</i> |
| Linear Plasticity   | Mn       | 10  | 18,352,030 | 2.30E-09       | Whole Panel     | 0.16 | 7.54%                     | 18.28                        | 18.48                      | High                |                          |                            | b,k       |               |
| Linear Plasticity   | Mn       | 11  | 3,351,208  | 6.49E-11       | Whole Panel     | 0.10 | 1.37%                     | 3.29                         | 3.49                       | High                |                          |                            |           |               |
| Linear Plasticity   | Mn       | 11  | 19,445,868 | 4.57E-10       | <i>Japonica</i> | 0.30 | 14.24%                    | 19.43                        | 19.92                      | High                |                          |                            |           | r             |
| Linear Plasticity   | Mn       | 11  | 21,424,624 | 2.69E-16       | Whole Panel     | 0.05 | 1.96%                     | 21.32                        | 21.52                      | High                |                          |                            |           | k,r           |
| Linear Plasticity   | Mn       | 11  | 25,881,927 | 9.08E-09       | Whole Panel     | 0.40 | 7.54%                     | 25.59                        | 25.88                      | Low                 |                          |                            |           | k,o           |
| Linear Plasticity   | Mn       | 12  | 21,171,270 | 7.28E-09       | <i>Japonica</i> | 0.30 | 1.41%                     | 20.92                        | 21.42                      | Low                 |                          |                            |           |               |
| Linear Plasticity   | Mn       | 12  | 24,803,594 | 1.45E-09       | Whole Panel     | 0.47 | 7.54%                     | 24.55                        | 25.05                      | Low                 |                          |                            |           | r             |
| Linear Plasticity   | Na       | 7   | 1,187,203  | 5.29E-08       | <i>Japonica</i> | 0.17 | 11.02%                    | 1.11                         | 1.31                       | High                |                          |                            |           |               |
| Linear Plasticity   | Na       | 8   | 144,296    | 1.78E-08       | Whole Panel     | 0.09 | 15.83%                    | 0.04                         | 0.24                       | Low                 |                          |                            |           |               |
| Linear Plasticity   | Ni       | 1   | 33,555,927 | 6.46E-18       | Whole Panel     | 0.14 | 1.69%                     | 33.46                        | 33.66                      | High                | Y                        |                            |           |               |
| Linear Plasticity   | Ni       | 1   | 33,555,927 | 5.02E-16       | <i>Japonica</i> | 0.29 | 1.53%                     | 33.46                        | 33.66                      | High                | Y                        |                            |           |               |
| Linear Plasticity   | Ni       | 1   | 36,798,732 | 8.36E-11       | Whole Panel     | 0.06 | 12.13%                    | 36.49                        | 36.94                      | High                |                          |                            |           |               |
| Linear Plasticity   | Ni       | 4   | 32,456,653 | 7.43E-09       | <i>Japonica</i> | 0.09 | 0.42%                     | 32.21                        | 32.71                      | Low                 |                          |                            |           |               |
| Linear Plasticity   | Ni       | 5   | 27,954,217 | 3.66E-10       | Whole Panel     | 0.35 | 13.15%                    | 27.87                        | 28.07                      | High                |                          |                            |           |               |
| Linear Plasticity   | Ni       | 6   | 3,019,092  | 5.48E-09       | Whole Panel     | 0.07 | 2.01%                     | 2.92                         | 3.12                       | High                |                          |                            |           |               |
| Linear Plasticity   | Ni       | 7   | 2,931,127  | 4.57E-09       | <i>Japonica</i> | 0.25 | 1.69%                     | 2.77                         | 2.97                       | High                |                          |                            |           |               |
| Linear Plasticity   | Ni       | 8   | 15,976,418 | 1.11E-10       | Whole Panel     | 0.39 | 15.34%                    | 15.73                        | 16.23                      | High                |                          |                            |           |               |
| Linear Plasticity   | Ni       | 10  | 8,856,540  | 5.20E-10       | Whole Panel     | 0.09 | 11.18%                    | 8.76                         | 8.96                       | High                |                          |                            |           |               |
| Linear Plasticity   | Ni       | 11  | 3,574,206  | 1.27E-08       | <i>Indica</i>   | 0.34 | 15.99%                    | 3.45                         | 3.65                       | High                |                          |                            |           |               |
| Linear Plasticity   | Ni       | 11  | 20,808,842 | 9.07E-09       | <i>Japonica</i> | 0.07 | 1.69%                     | 20.64                        | 21.10                      | High                |                          |                            |           |               |
| Linear Plasticity   | Ni       | 11  | 28,829,649 | 6.62E-09       | Whole Panel     | 0.43 | 2.41%                     | 28.73                        | 28.93                      | High                |                          |                            |           |               |
| Linear Plasticity   | Ni       | 12  | 1,254,782  | 4.49E-10       | Whole Panel     | 0.11 | 2.61%                     | 0.93                         | 1.33                       | Low                 |                          |                            |           |               |
| Linear Plasticity   | P        | 1   | 27,797,186 | 4.12E-08       | <i>Japonica</i> | 0.05 | 16.60%                    | 27.70                        | 27.90                      | Low                 |                          |                            |           | b             |
| Linear Plasticity   | P        | 5   | 20,758,645 | 7.46E-11       | Whole Panel     | 0.45 | 16.69%                    | 20.51                        | 21.01                      | High                |                          |                            |           | k             |
| Linear Plasticity   | P        | 7   | 6,889,146  | 6.57E-12       | Whole Panel     | 0.30 | 6.61%                     | 6.64                         | 7.14                       | High                |                          |                            |           |               |

| Phenotypic Measures   | Elements | Chr | Pos        | P.value (GWAS) | Panel           | MAF  | PVE (Phenotypic measures) | Significant Region Start(Mb) | Significant Region End(Mb) | Allele Effect (Nip) | Overlap (Between Panels) | Overlap (Between Measures) | Reference | Genes |
|-----------------------|----------|-----|------------|----------------|-----------------|------|---------------------------|------------------------------|----------------------------|---------------------|--------------------------|----------------------------|-----------|-------|
| Linear Plasticity     | P        | 8   | 673,949    | 2.20E-08       | <i>Indica</i>   | 0.40 | 18.90%                    | 0.56                         | 0.76                       | High                |                          |                            |           |       |
| Linear Plasticity     | P        | 11  | 10,286,298 | 4.88E-11       | Whole Panel     | 0.10 | 14.01%                    | 10.19                        | 10.39                      | Low                 |                          |                            |           |       |
| Linear Plasticity     | P        | 11  | 28,350,406 | 8.16E-10       | Whole Panel     | 0.47 | 0.76%                     | 28.10                        | 28.60                      | Low                 |                          | Y                          |           |       |
| Linear Plasticity     | S        | 8   | 10,533,717 | 8.20E-09       | Whole Panel     | 0.48 | 4.50%                     | 10.28                        | 10.78                      | High                |                          |                            |           |       |
| Linear Plasticity     | S        | 10  | 8,436,666  | 8.96E-12       | <i>Japonica</i> | 0.09 | 12.15%                    | 8.34                         | 8.54                       | High                |                          |                            |           |       |
| Linear Plasticity     | S        | 10  | 10,417,578 | 8.54E-09       | <i>Japonica</i> | 0.36 | 13.52%                    | 10.40                        | 10.76                      | Low                 |                          |                            |           |       |
| Linear Plasticity     | S        | 11  | 5,853,198  | 1.92E-11       | Whole Panel     | 0.49 | 4.50%                     | 5.60                         | 6.10                       | High                |                          |                            |           |       |
| Linear Plasticity     | S        | 11  | 26,344,588 | 1.07E-08       | <i>Indica</i>   | 0.43 | 12.56%                    | 26.09                        | 26.59                      | Low                 | Y                        |                            |           |       |
| Linear Plasticity     | S        | 11  | 26,344,588 | 8.82E-11       | Whole Panel     | 0.24 | 4.50%                     | 26.09                        | 26.59                      | Low                 | Y                        |                            |           |       |
| Linear Plasticity     | Se       | 4   | 15,899,991 | 4.58E-09       | Whole Panel     | 0.08 | 15.82%                    | 15.65                        | 16.15                      | High                |                          |                            |           |       |
| Linear Plasticity     | Zn       | 1   | 29,339,007 | 1.47E-10       | Whole Panel     | 0.06 | 3.24%                     | 29.25                        | 29.45                      | High                |                          |                            |           |       |
| Linear Plasticity     | Zn       | 1   | 32,235,498 | 3.29E-08       | <i>Japonica</i> | 0.13 | 0.00%                     | 31.99                        | 32.49                      | Low                 |                          |                            |           | o,p   |
| Linear Plasticity     | Zn       | 2   | 35,271,642 | 1.10E-08       | <i>Japonica</i> | 0.08 | 18.51%                    | 35.17                        | 35.37                      | High                |                          |                            |           | m     |
| Linear Plasticity     | Zn       | 3   | 6,391,925  | 1.47E-10       | <i>Indica</i>   | 0.28 | 2.39%                     | 6.14                         | 6.64                       | Low                 |                          |                            |           |       |
| Linear Plasticity     | Zn       | 4   | 29,338,989 | 2.61E-09       | <i>Indica</i>   | 0.08 | 4.35%                     | 29.09                        | 29.59                      | Low                 |                          |                            |           | e,j,r |
| Linear Plasticity     | Zn       | 5   | 28,279,181 | 9.19E-09       | <i>Indica</i>   | 0.13 | 4.35%                     | 28.18                        | 28.38                      | High                |                          |                            |           | o     |
| Linear Plasticity     | Zn       | 6   | 10,428,696 | 6.26E-12       | <i>Indica</i>   | 0.07 | 4.35%                     | 10.10                        | 10.59                      | Low                 |                          |                            |           | n,p   |
| Linear Plasticity     | Zn       | 6   | 14,156,952 | 2.33E-13       | Whole Panel     | 0.13 | 11.74%                    | 13.91                        | 14.41                      | High                |                          |                            |           |       |
| Linear Plasticity     | Zn       | 7   | 1,186,758  | 3.61E-09       | Whole Panel     | 0.08 | 11.52%                    | 1.11                         | 1.31                       | High                |                          |                            |           |       |
| Linear Plasticity     | Zn       | 8   | 2,795,270  | 3.06E-12       | <i>Japonica</i> | 0.47 | 19.30%                    | 2.72                         | 2.92                       | Low                 | Y                        | Y                          |           | b     |
| Linear Plasticity     | Zn       | 8   | 2,802,062  | 4.77E-11       | Whole Panel     | 0.21 | 14.29%                    | 2.70                         | 2.90                       | Low                 | Y                        | Y                          |           |       |
| Linear Plasticity     | Zn       | 8   | 16,367,622 | 2.30E-09       | <i>Indica</i>   | 0.07 | 4.35%                     | 16.27                        | 16.47                      | Low                 |                          |                            |           |       |
| Linear Plasticity     | Zn       | 9   | 7,938,546  | 5.72E-11       | <i>Indica</i>   | 0.43 | 4.35%                     | 7.69                         | 8.19                       | High                |                          |                            |           | q     |
| Linear Plasticity     | Zn       | 9   | 18,056,014 | 3.25E-09       | Whole Panel     | 0.12 | 2.81%                     | 17.81                        | 18.31                      | Low                 |                          |                            |           | e,m   |
| Linear Plasticity     | Zn       | 10  | 9,561,158  | 1.18E-13       | Whole Panel     | 0.36 | 12.15%                    | 9.31                         | 9.81                       | Low                 |                          |                            |           | m,r   |
| Linear Plasticity     | Zn       | 12  | 15,229,642 | 1.58E-09       | <i>Indica</i>   | 0.17 | 4.35%                     | 15.13                        | 15.33                      | High                |                          |                            |           |       |
| Non-linear Plasticity | As       | 1   | 3,409,528  | 1.04E-09       | <i>Indica</i>   | 0.05 | 6.31%                     | 3.31                         | 3.51                       | High                |                          |                            |           |       |
| Non-linear Plasticity | As       | 2   | 32,166,813 | 1.02E-10       | Whole Panel     | 0.44 | 17.78%                    | 31.92                        | 32.42                      | High                |                          |                            |           |       |
| Non-linear Plasticity | As       | 4   | 1,508,827  | 3.58E-08       | <i>Japonica</i> | 0.10 | 20.62%                    | 1.41                         | 1.61                       | Low                 |                          |                            |           |       |
| Non-linear Plasticity | As       | 5   | 27,009,168 | 2.24E-09       | <i>Indica</i>   | 0.33 | 6.31%                     | 26.91                        | 27.11                      | Low                 |                          |                            |           |       |
| Non-linear Plasticity | As       | 9   | 12,571,156 | 1.44E-13       | <i>Indica</i>   | 0.05 | 6.31%                     | 12.33                        | 12.58                      | High                |                          |                            |           |       |
| Non-linear Plasticity | As       | 10  | 9,742,336  | 1.59E-10       | <i>Japonica</i> | 0.17 | 20.62%                    | 9.64                         | 9.84                       | Low                 |                          |                            |           |       |

| Phenotypic Measures   | Elements | Chr | Pos        | P.value (GWAS) | Panel           | MAF  | PVE (Phenotypic measures) | Significant Region Start(Mb) | Significant Region End(Mb) | Allele Effect (Nip) | Overlap (Between Panels) | Overlap (Between Measures) | Reference | Genes |
|-----------------------|----------|-----|------------|----------------|-----------------|------|---------------------------|------------------------------|----------------------------|---------------------|--------------------------|----------------------------|-----------|-------|
| Non-linear Plasticity | As       | 12  | 2,502,754  | 1.57E-08       | <i>Indica</i>   | 0.11 | 6.31%                     | 2.40                         | 2.60                       | High                |                          |                            | m         |       |
| Non-linear Plasticity | Cd       | 3   | 35,788,257 | 7.72E-11       | Whole Panel     | 0.09 | 18.49%                    | 35.61                        | 35.81                      | Low                 |                          |                            | e,q       |       |
| Non-linear Plasticity | Cd       | 4   | 1,727,453  | 9.12E-09       | Whole Panel     | 0.05 | 0.78%                     | 1.63                         | 1.83                       | High                |                          |                            | q         |       |
| Non-linear Plasticity | Cd       | 7   | 18,453,163 | 6.32E-12       | Whole Panel     | 0.20 | 1.54%                     | 18.35                        | 18.55                      | Low                 |                          |                            | q         |       |
| Non-linear Plasticity | Cd       | 8   | 20,825,168 | 1.36E-09       | Whole Panel     | 0.10 | 17.53%                    | 20.75                        | 20.95                      | Low                 |                          |                            |           |       |
| Non-linear Plasticity | Cd       | 9   | 14,446,563 | 1.50E-11       | Whole Panel     | 0.06 | 13.98%                    | 14.20                        | 14.70                      | High                |                          |                            |           |       |
| Non-linear Plasticity | Cr       | 2   | 15,068,277 | 1.75E-20       | <i>Japonica</i> | 0.10 | 11.06%                    | 14.97                        | 15.17                      | Low                 |                          |                            |           |       |
| Non-linear Plasticity | Cr       | 8   | 3,776,609  | 4.37E-08       | <i>Japonica</i> | 0.06 | 6.76%                     | 3.68                         | 3.88                       | Low                 |                          |                            |           |       |
| Non-linear Plasticity | Cr       | 10  | 10,100,239 | 7.98E-10       | <i>Japonica</i> | 0.07 | 11.06%                    | 9.85                         | 10.35                      | Low                 |                          |                            |           |       |
| Non-linear Plasticity | Cr       | 11  | 28,140,687 | 8.95E-10       | <i>Japonica</i> | 0.06 | 11.06%                    | 27.99                        | 28.43                      | Low                 |                          |                            |           |       |
| Non-linear Plasticity | Cu       | 6   | 9,395,827  | 1.75E-08       | Whole Panel     | 0.37 | 4.64%                     | 9.15                         | 9.65                       | High                |                          |                            | k         |       |
| Non-linear Plasticity | Fe       | 1   | 35,512,030 | 7.27E-11       | <i>Japonica</i> | 0.08 | 0.28%                     | 35.41                        | 35.61                      | Low                 |                          |                            | i,l       |       |
| Non-linear Plasticity | Fe       | 10  | 13,745,390 | 9.40E-09       | Whole Panel     | 0.44 | 2.42%                     | 13.50                        | 14.00                      | Low                 |                          |                            | c         |       |
| Non-linear Plasticity | Mg       | 3   | 34,050,852 | 5.52E-10       | Whole Panel     | 0.10 | 8.44%                     | 33.95                        | 34.15                      | Low                 |                          |                            |           |       |
| Non-linear Plasticity | Mg       | 7   | 29,177,987 | 7.14E-11       | Whole Panel     | 0.33 | 18.70%                    | 28.93                        | 29.43                      | Low                 |                          | Y                          | r         |       |
| Non-linear Plasticity | Mg       | 8   | 6,816,038  | 1.09E-11       | Whole Panel     | 0.22 | 12.30%                    | 6.57                         | 7.07                       | Low                 |                          |                            |           |       |
| Non-linear Plasticity | Mg       | 11  | 27,222,144 | 1.56E-13       | Whole Panel     | 0.07 | 15.22%                    | 27.22                        | 27.65                      | Low                 |                          |                            |           |       |
| Non-linear Plasticity | Mn       | 1   | 23,617,899 | 1.08E-08       | Whole Panel     | 0.32 | 3.56%                     | 23.37                        | 23.87                      | High                |                          |                            | b         |       |
| Non-linear Plasticity | Mn       | 1   | 35,512,030 | 7.09E-11       | <i>Japonica</i> | 0.08 | 3.53%                     | 35.41                        | 35.61                      | Low                 |                          |                            |           |       |
| Non-linear Plasticity | Mn       | 2   | 22,432,713 | 7.09E-09       | <i>Japonica</i> | 0.26 | 3.53%                     | 22.30                        | 22.57                      | Low                 |                          |                            |           |       |
| Non-linear Plasticity | Mn       | 3   | 5,824,894  | 6.72E-10       | Whole Panel     | 0.09 | 9.99%                     | 5.57                         | 6.07                       | High                |                          | Y                          | d,r       |       |
| Non-linear Plasticity | Mn       | 5   | 9,474,966  | 9.58E-09       | <i>Japonica</i> | 0.07 | 3.53%                     | 9.37                         | 9.57                       | Low                 |                          |                            |           |       |
| Non-linear Plasticity | Mn       | 10  | 4,402,667  | 3.99E-09       | Whole Panel     | 0.09 | 9.99%                     | 4.30                         | 4.50                       | Low                 |                          |                            |           |       |
| Non-linear Plasticity | Ni       | 1   | 9,677,594  | 1.81E-10       | Whole Panel     | 0.17 | 6.50%                     | 9.58                         | 9.78                       | High                |                          |                            |           |       |
| Non-linear Plasticity | Ni       | 1   | 23,612,824 | 7.08E-11       | <i>Japonica</i> | 0.18 | 12.08%                    | 23.45                        | 23.65                      | High                |                          |                            |           |       |
| Non-linear Plasticity | Ni       | 1   | 31,532,723 | 9.24E-10       | Whole Panel     | 0.11 | 6.50%                     | 31.06                        | 31.53                      | Low                 |                          |                            |           |       |
| Non-linear Plasticity | Ni       | 2   | 31,732,068 | 5.96E-09       | Whole Panel     | 0.13 | 1.55%                     | 31.48                        | 31.98                      | High                |                          |                            |           |       |
| Non-linear Plasticity | Ni       | 4   | 1,792,324  | 8.16E-11       | Whole Panel     | 0.31 | 0.29%                     | 1.54                         | 2.04                       | Low                 |                          |                            | k         |       |
| Non-linear Plasticity | Ni       | 6   | 10,393,703 | 1.17E-08       | Whole Panel     | 0.15 | 1.47%                     | 10.14                        | 10.64                      | Low                 |                          |                            |           |       |
| Non-linear Plasticity | Ni       | 6   | 15,433,153 | 2.37E-10       | Whole Panel     | 0.19 | 11.80%                    | 15.33                        | 15.53                      | High                | Y                        |                            |           |       |
| Non-linear Plasticity | Ni       | 6   | 15,433,153 | 3.28E-08       | <i>Japonica</i> | 0.42 | 6.50%                     | 15.33                        | 15.53                      | High                | Y                        |                            |           |       |
| Non-linear Plasticity | Ni       | 7   | 20,715,732 | 4.93E-09       | Whole Panel     | 0.26 | 5.47%                     | 20.61                        | 20.81                      | High                |                          |                            |           |       |

| Phenotypic Measures   | Elements | Chr | Pos        | P.value (GWAS) | Panel           | MAF  | PVE (Phenotypic measures) | Significant Region Start(Mb) | Significant Region End(Mb) | Allele Effect (Nip) | Overlap (Between Panels) | Overlap (Between Measures) | Reference | Genes |
|-----------------------|----------|-----|------------|----------------|-----------------|------|---------------------------|------------------------------|----------------------------|---------------------|--------------------------|----------------------------|-----------|-------|
| Non-linear Plasticity | Ni       | 8   | 2,372,677  | 1.05E-12       | Whole Panel     | 0.05 | 4.27%                     | 2.37                         | 2.86                       | Low                 |                          |                            |           |       |
| Non-linear Plasticity | Ni       | 10  | 148,287    | 3.76E-09       | <i>Japonica</i> | 0.20 | 2.12%                     | -0.10                        | 0.40                       | Low                 |                          |                            |           |       |
| Non-linear Plasticity | Ni       | 10  | 5,974,487  | 5.29E-09       | Whole Panel     | 0.08 | 1.32%                     | 5.87                         | 6.07                       | High                |                          |                            |           |       |
| Non-linear Plasticity | Ni       | 11  | 13,985,661 | 6.18E-10       | Whole Panel     | 0.24 | 6.03%                     | 13.74                        | 14.24                      | Low                 |                          |                            |           |       |
| Non-linear Plasticity | Ni       | 12  | 27,085,898 | 3.60E-10       | Whole Panel     | 0.11 | 6.50%                     | 26.95                        | 27.18                      | High                |                          |                            |           |       |
| Non-linear Plasticity | Pb       | 4   | 34,431,554 | 1.19E-08       | Whole Panel     | 0.48 | 16.63%                    | 34.18                        | 34.68                      | High                |                          |                            |           |       |
| Non-linear Plasticity | Pb       | 7   | 1,482,945  | 3.15E-08       | <i>Japonica</i> | 0.07 | 14.96%                    | 1.38                         | 1.58                       | Low                 |                          |                            |           |       |
| Non-linear Plasticity | Pb       | 12  | 6,759,531  | 5.60E-09       | <i>Japonica</i> | 0.06 | 7.69%                     | 6.51                         | 7.01                       | Low                 |                          |                            |           |       |
| Non-linear Plasticity | Pb       | 12  | 26,966,856 | 2.39E-08       | <i>Japonica</i> | 0.14 | 14.96%                    | 26.72                        | 27.22                      | High                |                          |                            |           |       |
| Non-linear Plasticity | S        | 11  | 19,023,378 | 1.05E-08       | Whole Panel     | 0.33 | 4.57%                     | 18.77                        | 19.27                      | High                |                          |                            |           |       |
| Non-linear Plasticity | Se       | 1   | 35,512,030 | 1.23E-09       | <i>Japonica</i> | 0.08 | 1.69%                     | 35.41                        | 35.61                      | Low                 |                          |                            |           |       |
| Non-linear Plasticity | Se       | 4   | 14,599,445 | 7.99E-15       | <i>Japonica</i> | 0.08 | 1.69%                     | 14.50                        | 14.70                      | Low                 |                          |                            |           |       |
| Non-linear Plasticity | Se       | 4   | 28,351,497 | 1.09E-08       | <i>Japonica</i> | 0.08 | 1.69%                     | 28.25                        | 28.45                      | Low                 |                          |                            |           |       |
| Non-linear Plasticity | Se       | 5   | 21,167,548 | 3.25E-08       | <i>Japonica</i> | 0.13 | 1.69%                     | 21.07                        | 21.27                      | Low                 |                          |                            |           |       |
| Non-linear Plasticity | Se       | 6   | 31,051,366 | 3.01E-09       | <i>Japonica</i> | 0.05 | 1.69%                     | 30.95                        | 31.15                      | Low                 |                          |                            |           |       |
| Non-linear Plasticity | Se       | 7   | 27,008,817 | 4.19E-09       | <i>Indica</i>   | 0.21 | 3.89%                     | 26.78                        | 27.03                      | Low                 |                          |                            |           | k     |
| Non-linear Plasticity | Se       | 8   | 5,371,023  | 3.06E-09       | <i>Japonica</i> | 0.13 | 0.50%                     | 5.12                         | 5.62                       | Low                 |                          |                            |           |       |
| Non-linear Plasticity | Se       | 8   | 11,541,758 | 5.22E-10       | Whole Panel     | 0.40 | 16.25%                    | 11.29                        | 11.79                      | High                | Y                        |                            |           |       |
| Non-linear Plasticity | Se       | 8   | 11,541,758 | 2.31E-10       | <i>Indica</i>   | 0.07 | 7.12%                     | 11.44                        | 11.64                      | High                | Y                        |                            |           |       |
| Non-linear Plasticity | Se       | 8   | 13,431,441 | 4.07E-09       | Whole Panel     | 0.05 | 11.19%                    | 13.18                        | 13.68                      | Low                 |                          |                            |           |       |
| Non-linear Plasticity | Se       | 9   | 4,689,995  | 1.96E-09       | Whole Panel     | 0.16 | 3.69%                     | 4.44                         | 4.94                       | High                |                          |                            |           |       |
| Non-linear Plasticity | Se       | 11  | 19,242,926 | 6.45E-11       | <i>Japonica</i> | 0.24 | 1.69%                     | 18.99                        | 19.33                      | High                |                          |                            |           |       |
| Non-linear Plasticity | Se       | 11  | 27,829,933 | 1.37E-08       | Whole Panel     | 0.13 | 11.19%                    | 27.58                        | 28.08                      | Low                 |                          |                            |           | q     |
| Non-linear Plasticity | Zn       | 1   | 25,243,883 | 2.56E-10       | Whole Panel     | 0.13 | 8.13%                     | 25.11                        | 25.31                      | Low                 |                          |                            |           |       |
| Non-linear Plasticity | Zn       | 1   | 30,912,861 | 8.83E-09       | <i>Indica</i>   | 0.46 | 13.79%                    | 30.66                        | 31.16                      | Low                 |                          |                            |           |       |
| Non-linear Plasticity | Zn       | 3   | 14,148,910 | 2.00E-13       | Whole Panel     | 0.43 | 4.20%                     | 13.90                        | 14.40                      | Low                 |                          |                            |           |       |
| Non-linear Plasticity | Zn       | 4   | 9,743,667  | 7.28E-09       | Whole Panel     | 0.09 | 9.82%                     | 9.49                         | 9.99                       | Low                 |                          |                            |           |       |
| Non-linear Plasticity | Zn       | 6   | 23,710,865 | 8.94E-10       | Whole Panel     | 0.10 | 1.54%                     | 23.54                        | 23.85                      | High                |                          |                            |           | o,q   |
| Non-linear Plasticity | Zn       | 7   | 24,402,410 | 8.05E-13       | Whole Panel     | 0.08 | 3.23%                     | 24.15                        | 24.65                      | Low                 |                          |                            |           | e,i,r |
| Non-linear Plasticity | Zn       | 8   | 2,422,420  | 1.08E-09       | Whole Panel     | 0.11 | 19.32%                    | 2.42                         | 2.92                       | Low                 |                          | Y                          |           | b     |
| Non-linear Plasticity | Zn       | 8   | 21,935,326 | 2.17E-15       | Whole Panel     | 0.05 | 1.92%                     | 21.69                        | 22.19                      | Low                 |                          |                            |           | d     |
| Non-linear Plasticity | Zn       | 10  | 2,147,156  | 2.37E-10       | Whole Panel     | 0.07 | 7.28%                     | 2.13                         | 2.36                       | Low                 |                          |                            |           | r     |

- a: Abe T, Taguchi-Shiobara F, Kojima Y, Ebitani T, Kuramata M, Yamamoto T, Yano M, Ishikawa S (2011) Detection of a QTL for accumulating Cd in rice that enables efficient Cd phytoextraction from soil. *Breeding Science* 61:43-51
- b: Descalsota-Empleo GI, Amparado A, Inabangan-Asilo MA, Tesoro F, Stangoulis J, Reinke R, Swamy BPM (2019) Genetic mapping of QTL for agronomic traits and grain mineral elements in rice. *The Crop Journal* 7:560-572
- c: Descalsota GIL, Swamy BPM, Zaw H, Inabangan-Asilo MA, Amparado A, Mauleon R, Chadha-Mohanty P, Arocena EC, Raghavan C, Leung H, Hernandez JE, Lalusin AB, Mendiolo MS, Diaz MGQ, Reinke R (2018) Genome-Wide Association Mapping in a Rice MAGIC Plus Population Detects QTLs and Genes Useful for
- d: Garcia-Oliveira AL, Tan L, Fu Y, Sun C (2009) Genetic identification of quantitative trait loci for contents of mineral nutrients in rice grain. *Journal of integrative plant biology* 51:84-92
- e: Huang Y, Sun C, Min J, Chen Y, Tong C, Bao J (2015) Association Mapping of Quantitative Trait Loci for Mineral Element Contents in Whole Grain Rice (*Oryza sativa* L.). *Journal of Agricultural and Food Chemistry* 63:10885-10892
- f: Huang Y, Tong C, Xu F, Chen Y, Zhang C, Bao J (2016) Variation in mineral elements in grains of 20 brown rice accessions in two environments. *Food chemistry* 192:873-878
- g: Ishikawa S, Abe T, Kuramata M, Yamaguchi M, Ando T, Yamamoto T, Yano M (2010) A major quantitative trait locus for increasing cadmium-specific concentration in rice grain is located on the short arm of Somosome 7. *Journal of Experimental Botany* 61:923-934
- h: Kashiwagi T, Shindoh K, Hirotsu N, Ishimaru K (2009) Evidence for separate translocation pathways in determining cadmium accumulation in grain and aerial plant parts in rice. *BMC Plant Biology* 9:8
- i: Lu K, Li L, Zheng X, Zhang Z, Mou T, Hu Z (2008) Quantitative trait loci controlling Cu, Ca, Zn, Mn and Fe content in rice grains. *Journal of Genetics* 87:305-310
- j: Nawaz Z, Kakar KU, Li XB, Li S, Zhang B, Shou HX, Shu QY (2015) Genome-wide Association Mapping of Quantitative Trait Loci (QTLs) for Contents of Eight
- k: Norton GJ, Deacon CM, Xiong LZ, Huang SY, Meharg AA, Price AH (2010) Genetic mapping of the rice ionome in leaves and grain: identification of QTLs for 17
- l: Norton GJ, Douglas A, Lahner B, Yakubova E, Guerinot ML, Pinson SR, Tarpley L, Eizenga GC, McGrath SP, Zhao FJ, Islam MR, Islam S, Duan G, Zhu Y, Salt DE,
- m: Norton GJ, Duan G-L, Lei M, Zhu Y-G, Meharg AA, Price AH (2012) Identification of quantitative trait loci for rice grain element composition on an arsenic impacted
- n: Swamy BPM, Descalsota GIL, Nha CT, Amparado A, Inabangan-Asilo MA, Manito C, Tesoro F, Reinke R (2018) Identification of genomic regions associated with
- o: Yang M, Lu K, Zhao FJ, Xie W, Ramakrishna P, Wang G, Du Q, Liang L, Sun C, Zhao H, Zhang Z, Liu Z, Tian J, Huang XY, Wang W, Dong H, Hu J, Ming L, Xing Y,
- p: Yu YH, Shao YF, Liu J, Fan YY, Sun CX, Cao ZY, Zhuang JY (2015) Mapping of Quantitative Trait Loci for Contents of Macro- and Microelements in Milled Rice
- q: Zhang GM, Zheng TQ, Chen Z, Wang YL, Wang Y, Shi YM, Wang CC, Zhang LY, Ma JT, Deng LW, Li W, Xu TT, Liang CZ, Xu JL, Li ZK (2018) Joint Exploration of
- r: Zhang M, Pinson SR, Tarpley L, Huang XY, Lahner B, Yakubova E, Baxter I, Guerinot ML, Salt DE (2014) Mapping and validation of quantitative trait loci associated





| Elements | Type  | 2014Field-1 | 2014Field-2 | 2015Field-1 | 2015Field-2 | 2016Field-1 | 2016Field-2 | 2016Field-3 | 2017Field-1 | Mean   |
|----------|-------|-------------|-------------|-------------|-------------|-------------|-------------|-------------|-------------|--------|
| Se       | nlSAL | NA          | NA          | NA          | 3.08%       | 6.45%       | 3.33%       | 2.89%       | 2.76%       | 3.70%  |
| Zn       | mSAL  | 1.13%       | 1.21%       | 0.65%       | 16.85%      | 1.03%       | 5.10%       | 8.66%       | 16.17%      | 6.35%  |
| Zn       | lSAL  | 50.44%      | 56.07%      | 40.94%      | 12.39%      | 35.00%      | 37.63%      | 30.23%      | 2.19%       | 33.11% |
| Zn       | nlSAL | 1.76%       | 0.62%       | 0.89%       | 4.45%       | 0.76%       | 0.63%       | 1.53%       | 3.61%       | 1.78%  |

a: The proportion of phenotypic variance estimated in the whole-genome regression of each type of SAL, NA denotes the proportion of phenotypic variance was not estimated for insufficient quantity (less than 2).

b: The mean value was not estimated for insufficient quantity.

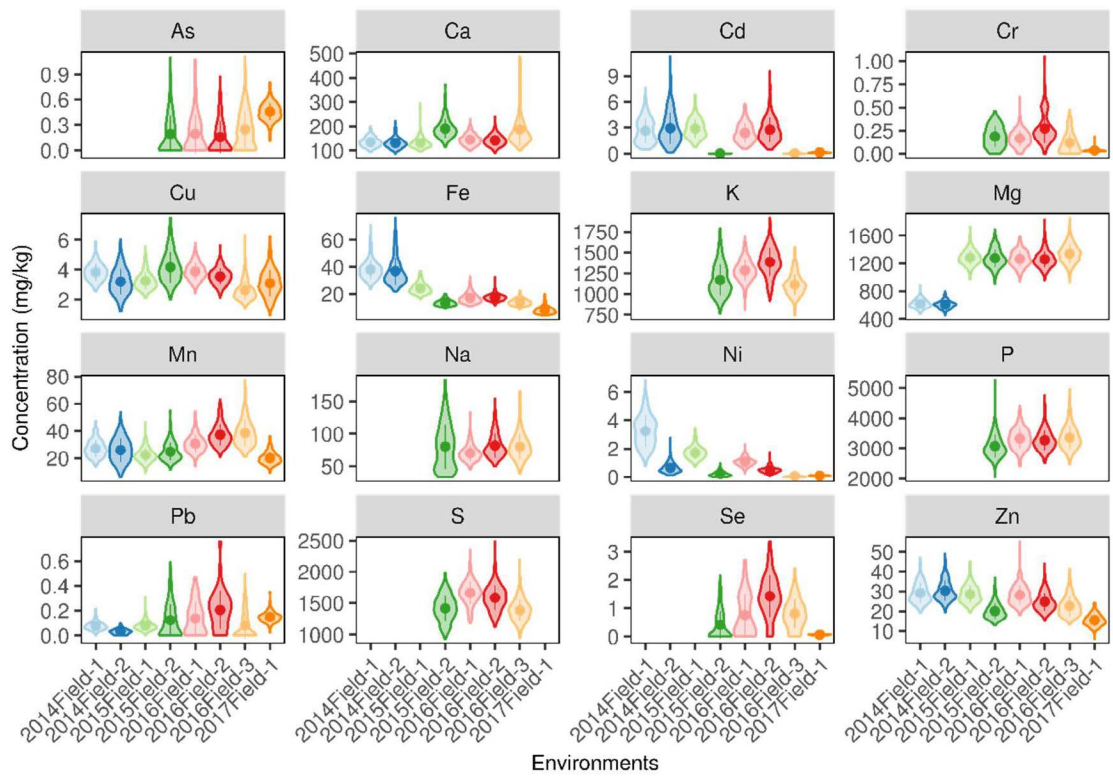

**Fig. S 1** Violin plots for elemental concentrations among different environments. The dot and line range in each violin denotes the mean value and standard deviation respectively.

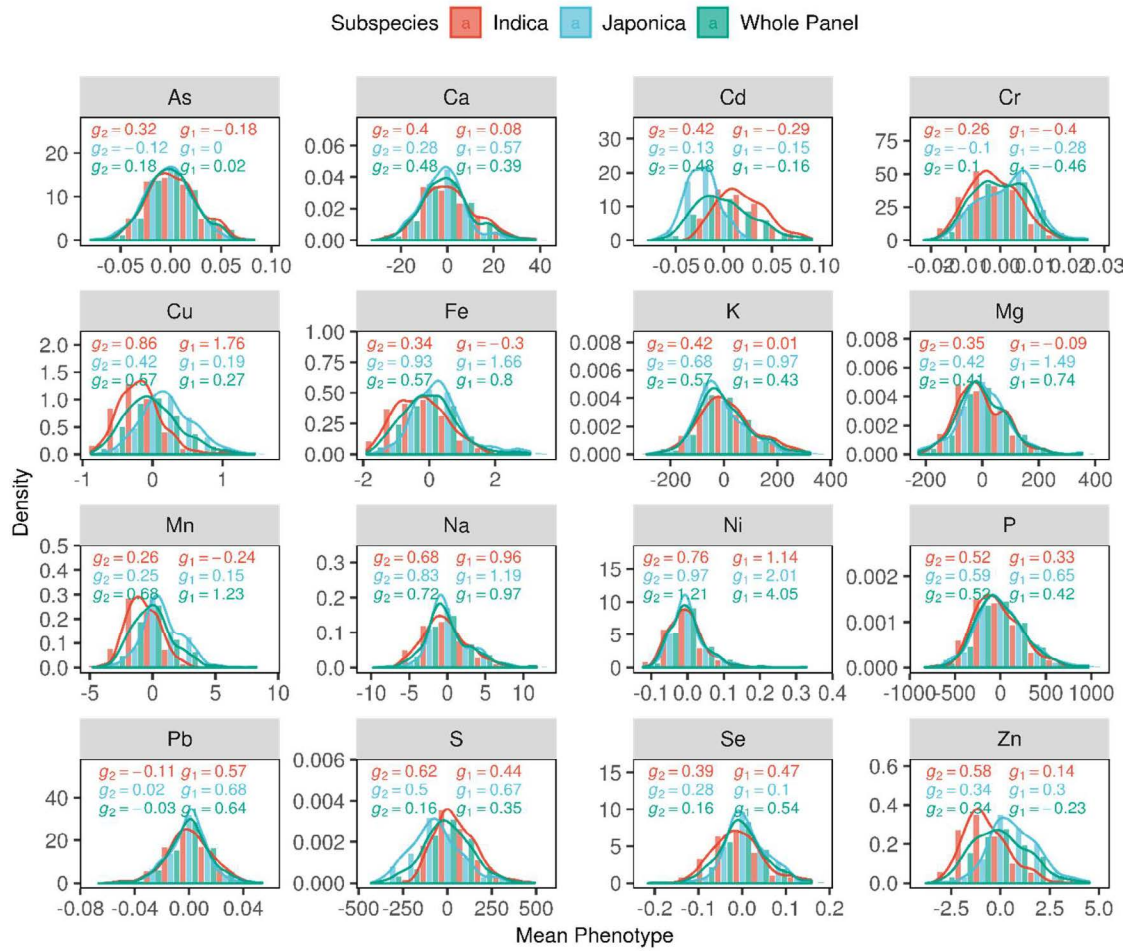

**Fig. S2** Histogram and kernel density of each element's mean phenotype in the whole panel and two subspecies. The skewness ( $g_1$ ) and kurtosis ( $g_2$ ) were labeled on each plot.

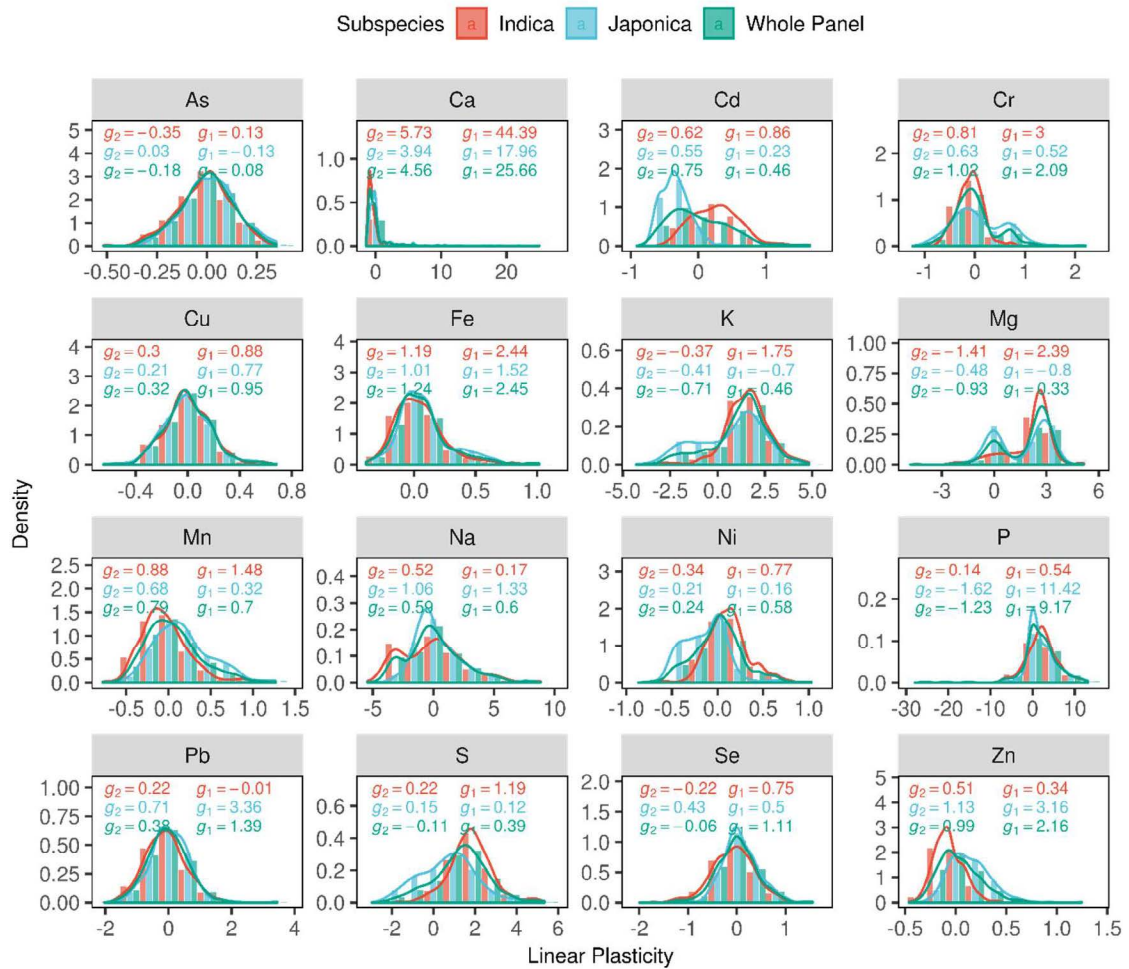

**Fig. S3** Histogram and kernel density of each element's linear plasticity in the whole panel and two subspecies. The skewness ( $g_1$ ) and kurtosis ( $g_2$ ) were labeled on each plot.

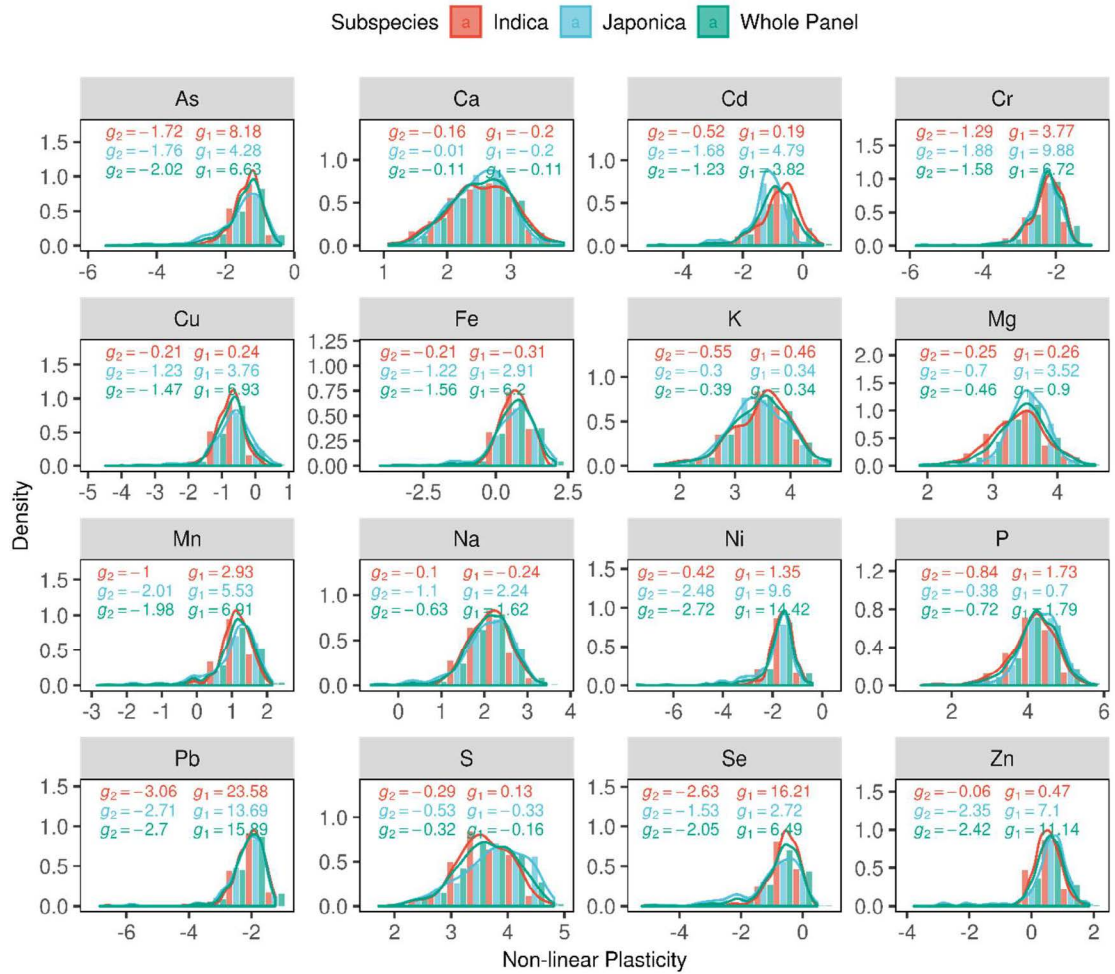

**Fig. S 4** Histogram and kernel density of each element's non-linear plasticity in the whole panel and two subspecies. The skewness ( $g_1$ ) and kurtosis ( $g_2$ ) were labeled on each plot.

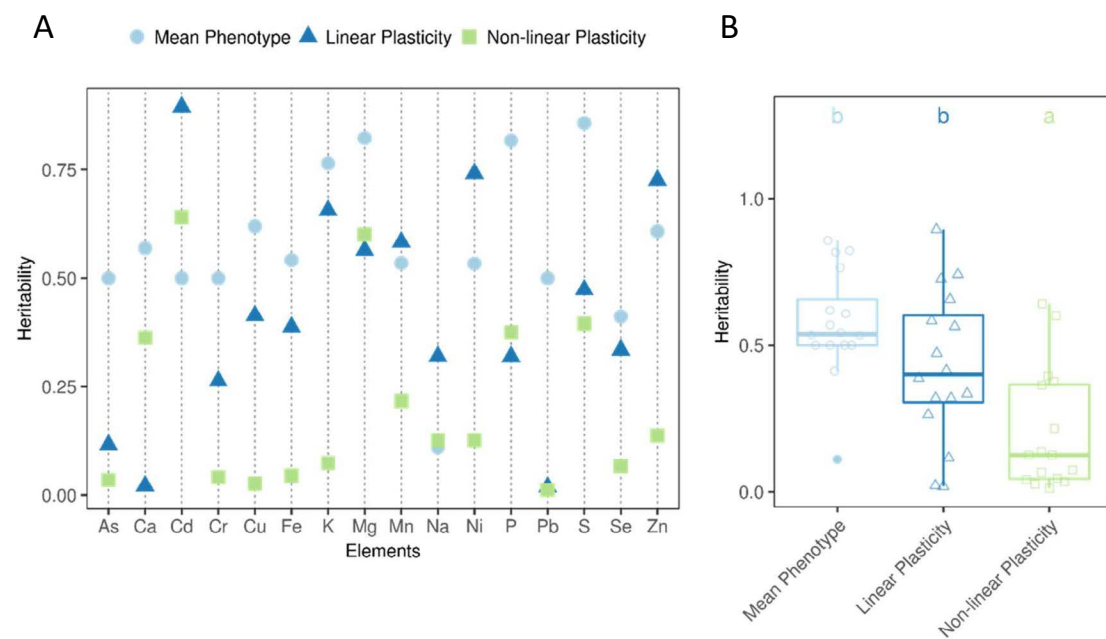

**Fig. S 5** Marker-based heritability ( $h^2$ ) of three phenotypic measures for each element. (A) The value of marker-based heritability. (B) The Boxplot of heritability of three phenotypic measures. The letter above each box indicates the multi-comparison results (Kruskal-Wallis,  $P < 0.05$ ).

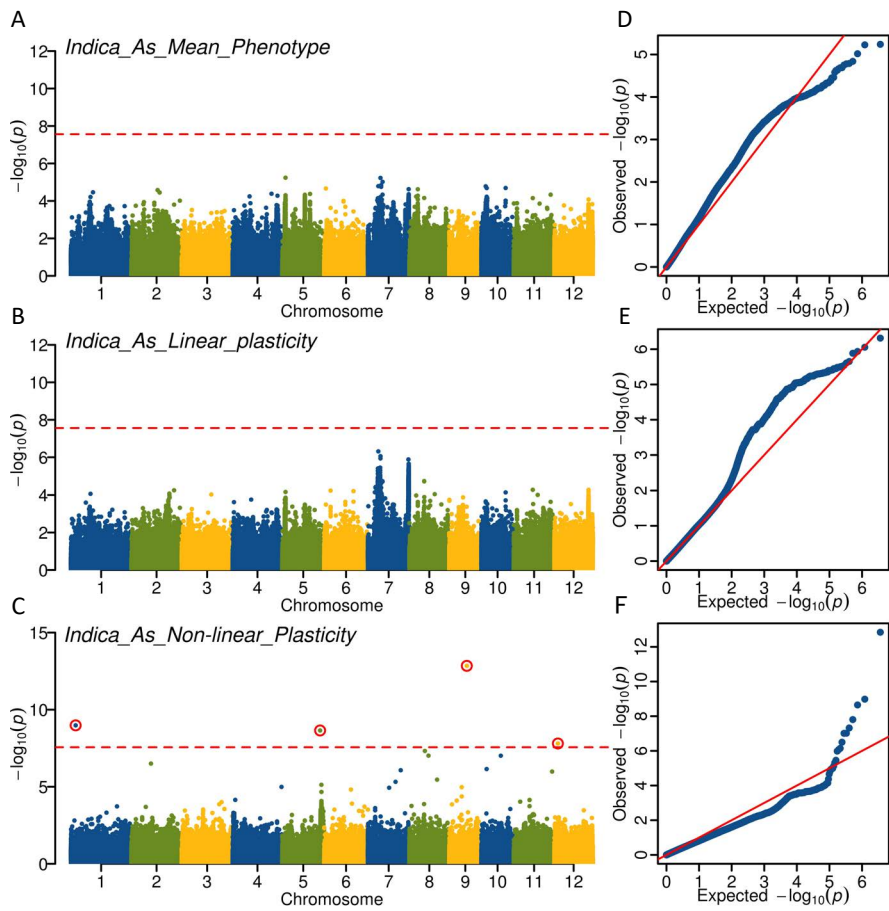

**Fig. S 6** GWAS results of three phenotypic measures of As in the *Indica* subspecies. (A-C) Manhattan plots of (A) the mean phenotype, (B) the linear plasticity, and (C) the non-linear plasticity, the horizontal dashed line indicates the threshold at  $2.7 \times 10^{-8}$ . The significantly associated loci (SALs) were labeled with red circles. (D-F) Quantile-quantile plots of the mean phenotype (D), the linear plasticity (E), and the non-linear plasticity (F).



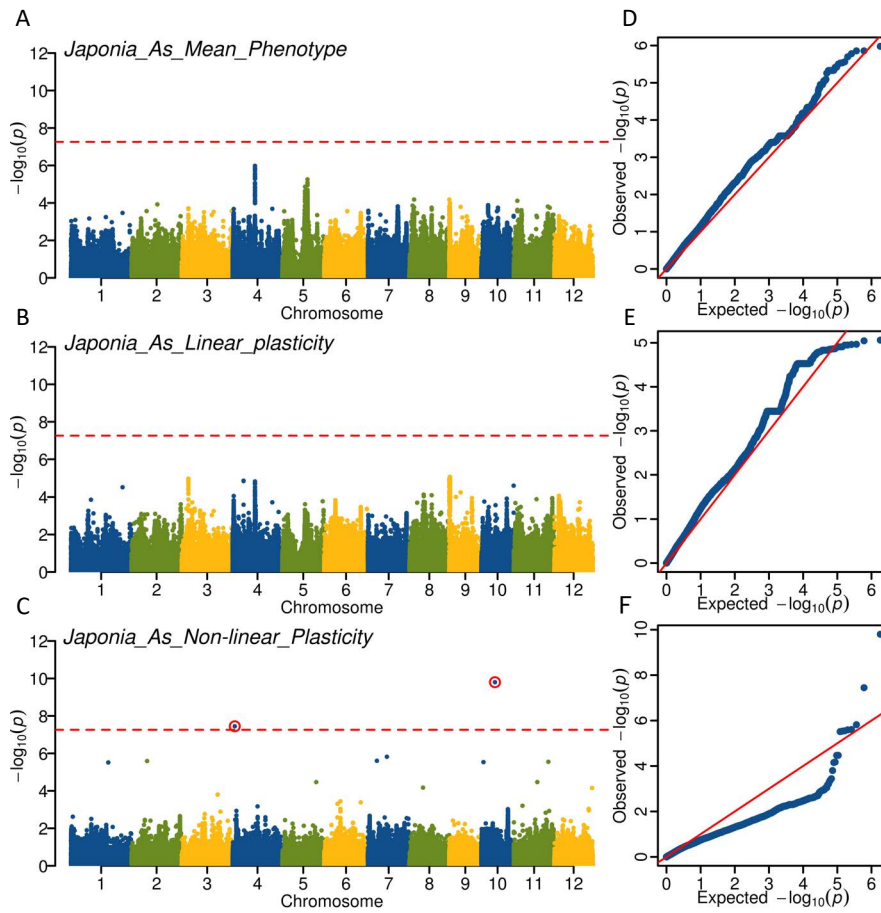

**Fig. S 7** GWAS results of three phenotypic measures of As in the *Japonica* subspecies. (A-C) Manhattan plots of (A) the mean phenotype, (B) the linear plasticity, and (C) the non-linear plasticity, the horizontal dashed line indicates the threshold at  $5.5 \times 10^{-8}$ . The significantly associated loci (SALs) were labeled with red circles. (D-F) Quantile-quantile plots of the mean phenotype (D), the linear plasticity (E), and the non-linear plasticity (F).

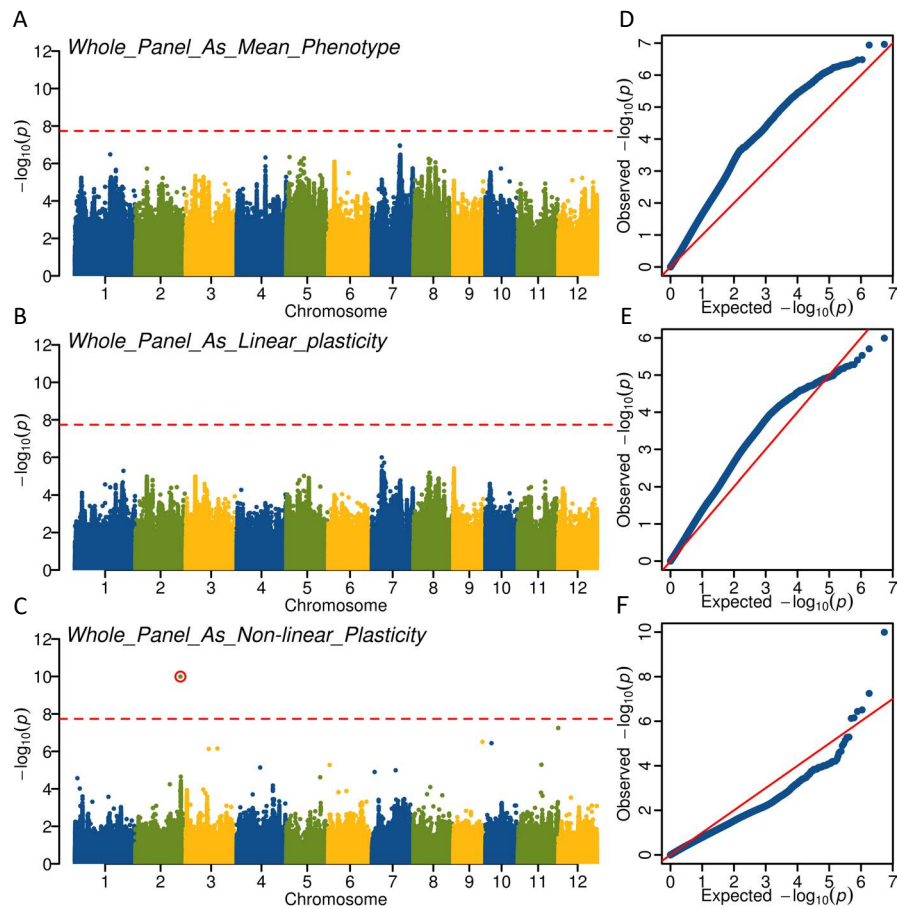

**Fig. S 8** GWAS results of three phenotypic measures of As in the whole panel. (A-C) Manhattan plots of (A) the mean phenotype, (B) the linear plasticity, and (C) the non-linear plasticity, the horizontal dashed line indicates the threshold at  $1.8 \times 10^{-8}$ . The significantly associated loci (SALs) were labeled with red circles. (D-F) Quantile-quantile plots of the mean phenotype (D), the linear plasticity (E), and the non-linear plasticity (F).

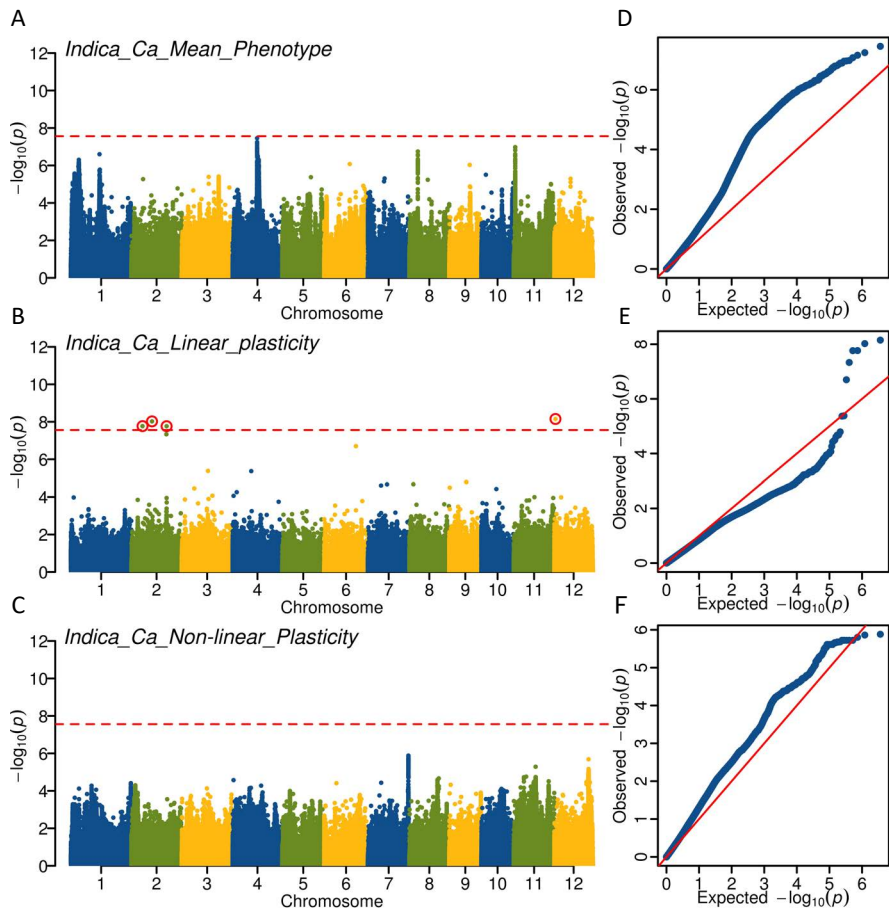

**Fig. S9** GWAS results of three phenotypic measures of Ca in the *Indica* subspecies. (A-C) Manhattan plots of (A) the mean phenotype, (B) the linear plasticity, and (C) the non-linear plasticity, the horizontal dashed line indicates the threshold at  $2.7 \times 10^{-8}$ . The significantly associated loci (SALs) were labeled with red circles. (D-F) Quantile-quantile plots of the mean phenotype (D), the linear plasticity (E), and the non-linear plasticity (F).

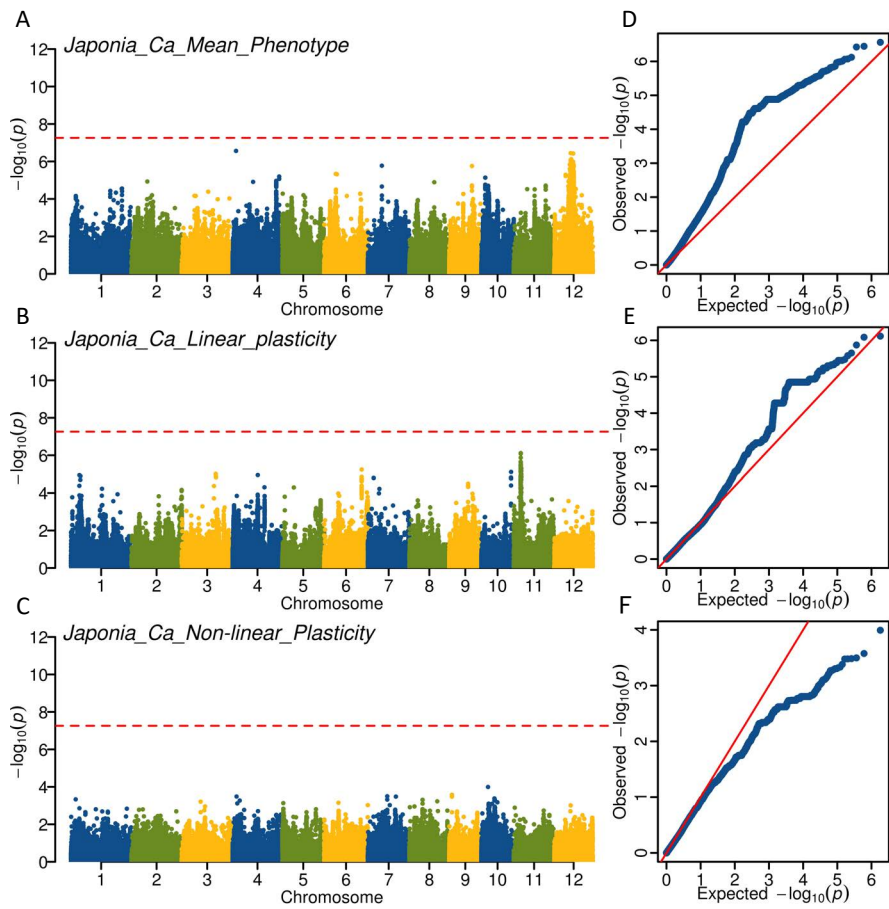

**Fig. S 10** GWAS results of three phenotypic measures of Ca in the *Japonica* subspecies. (A-C) Manhattan plots of (A) the mean phenotype, (B) the linear plasticity, and (C) the non-linear plasticity, the horizontal dashed line indicates the threshold at  $5.5 \times 10^{-8}$ . The significantly associated loci (SALs) were labeled with red circles. (D-F) Quantile-quantile plots of the mean phenotype (D), the linear plasticity (E), and the non-linear plasticity (F).

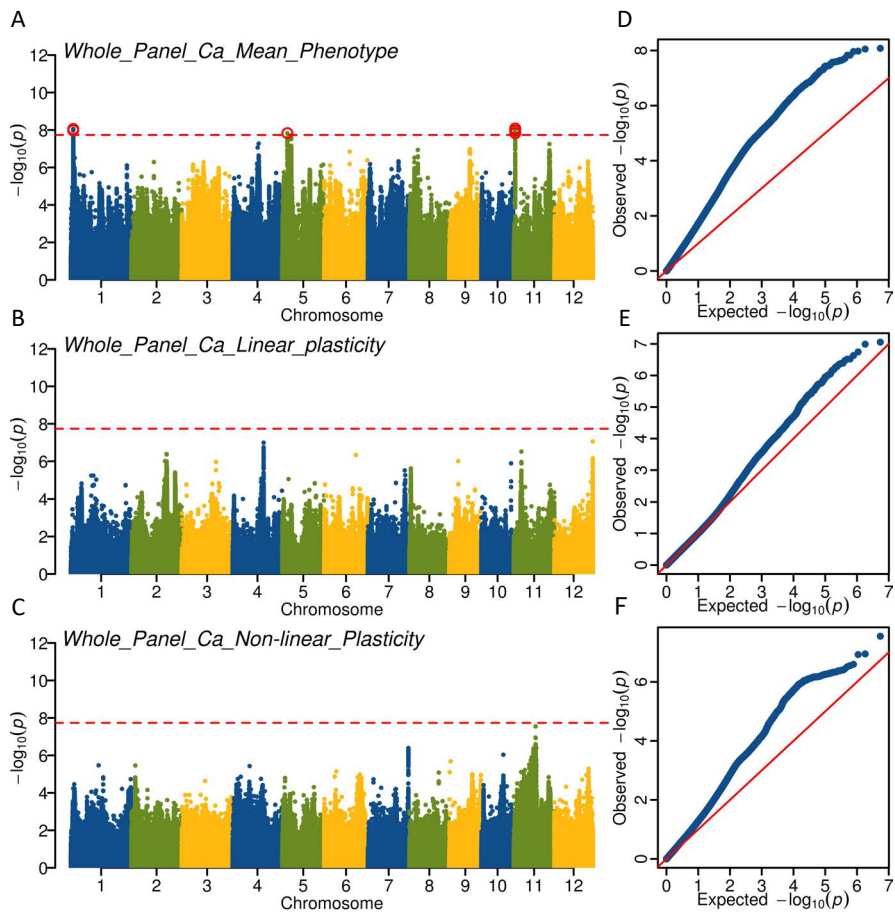

**Fig. S 11** GWAS results of three phenotypic measures of Ca in the whole panel. (A-C) Manhattan plots of (A) the mean phenotype, (B) the linear plasticity, and (C) the non-linear plasticity, the horizontal dashed line indicates the threshold at  $1.8e-8$ . The significantly associated loci (SALs) were labeled with red circles. (D-F) Quantile-quantile plots of the mean phenotype (D), the linear plasticity (E), and the non-linear plasticity (F).

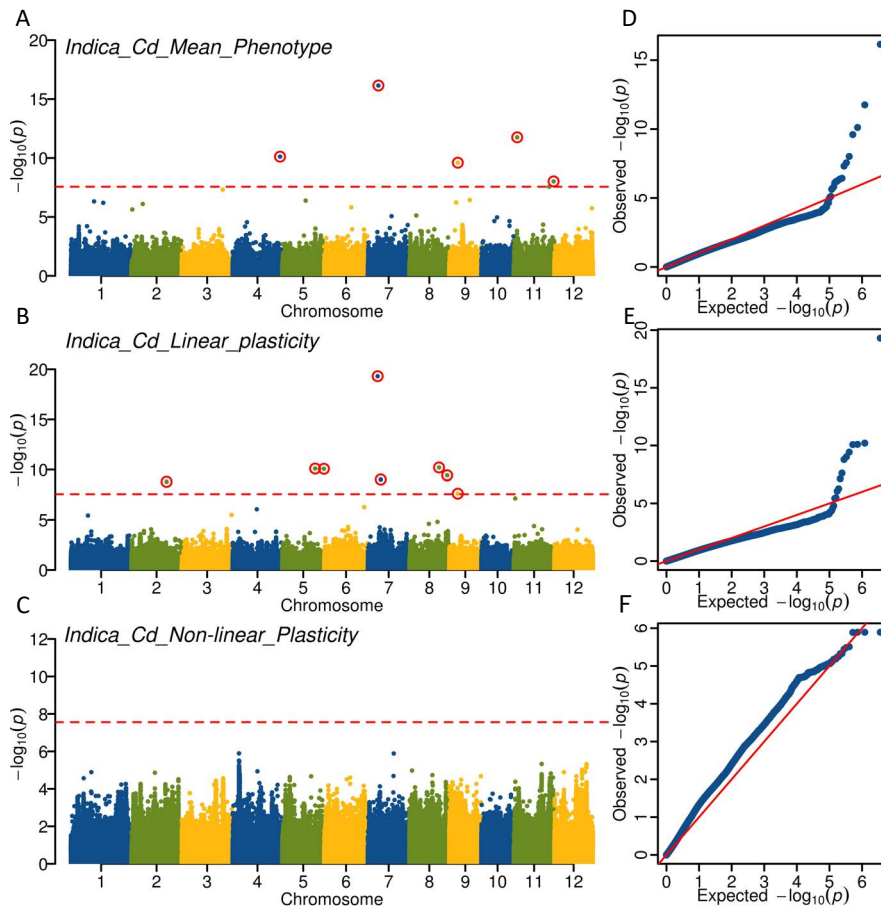

**Fig. S 12** GWAS results of three phenotypic measures of Cd in the *Indica* subspecies. (A-C) Manhattan plots of (A) the mean phenotype, (B) the linear plasticity, and (C) the non-linear plasticity, the horizontal dashed line indicates the threshold at  $2.7 \times 10^{-8}$ . The significantly associated loci (SALs) were labeled with red circles. (D-F) Quantile-quantile plots of the mean phenotype (D), the linear plasticity (E), and the non-linear plasticity (F).

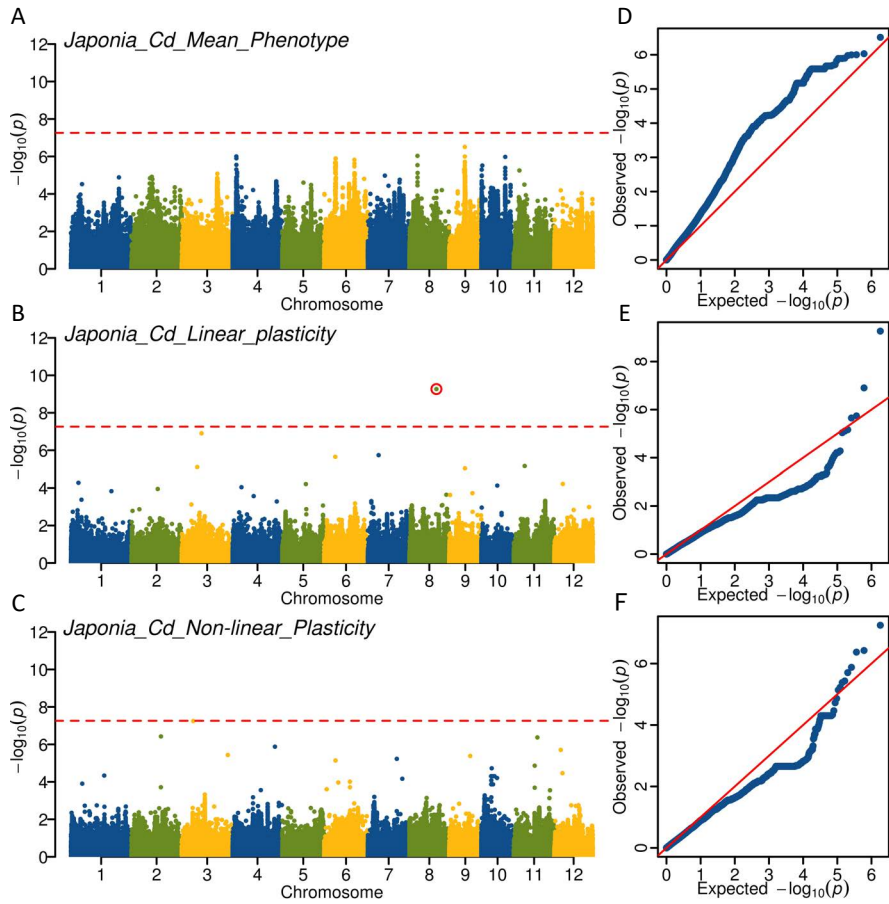

**Fig. S 13** GWAS results of three phenotypic measures of Cd in the *Japonica* subspecies. (A-C) Manhattan plots of (A) the mean phenotype, (B) the linear plasticity, and (C) the non-linear plasticity, the horizontal dashed line indicates the threshold at  $5.5 \times 10^{-8}$ . The significantly associated loci (SALs) were labeled with red circles. (D-F) Quantile-quantile plots of the mean phenotype (D), the linear plasticity (E), and the non-linear plasticity (F).

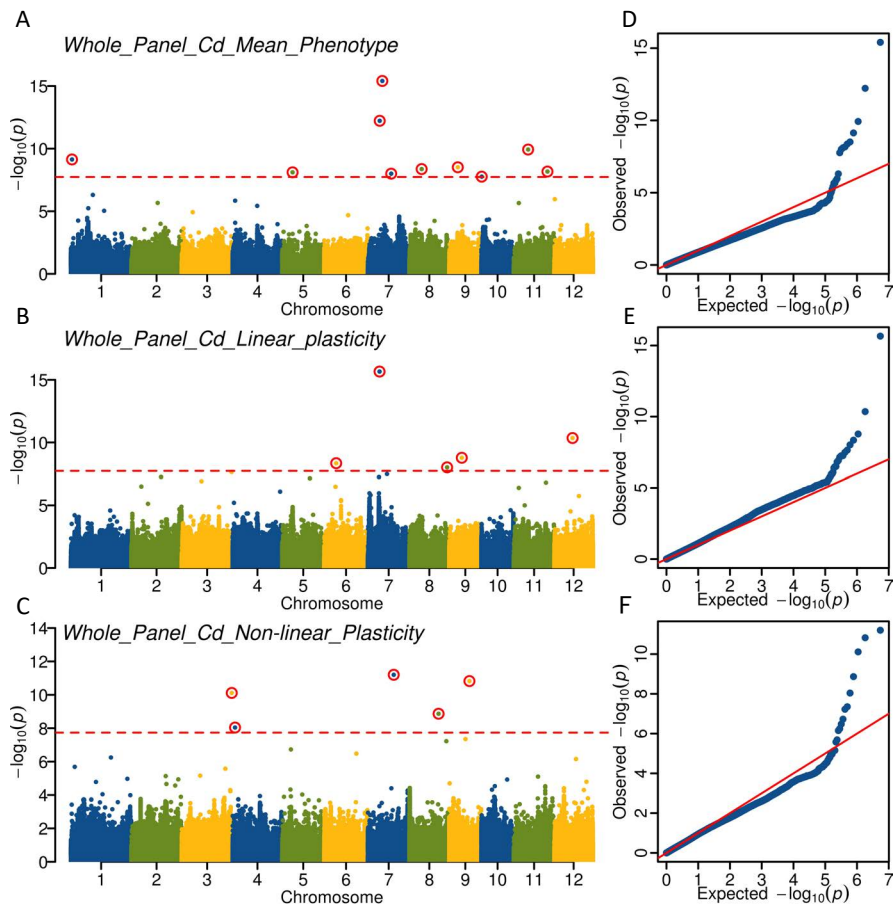

**Fig. S 14** GWAS results of three phenotypic measures of Cd in the whole panel. (A-C) Manhattan plots of (A) the mean phenotype, (B) the linear plasticity, and (C) the non-linear plasticity, the horizontal dashed line indicates the threshold at  $1.8 \times 10^{-8}$ . The significantly associated loci (SALs) were labeled with red circles. (D-F) Quantile-quantile plots of the mean phenotype (D), the linear plasticity (E), and the non-linear plasticity (F).



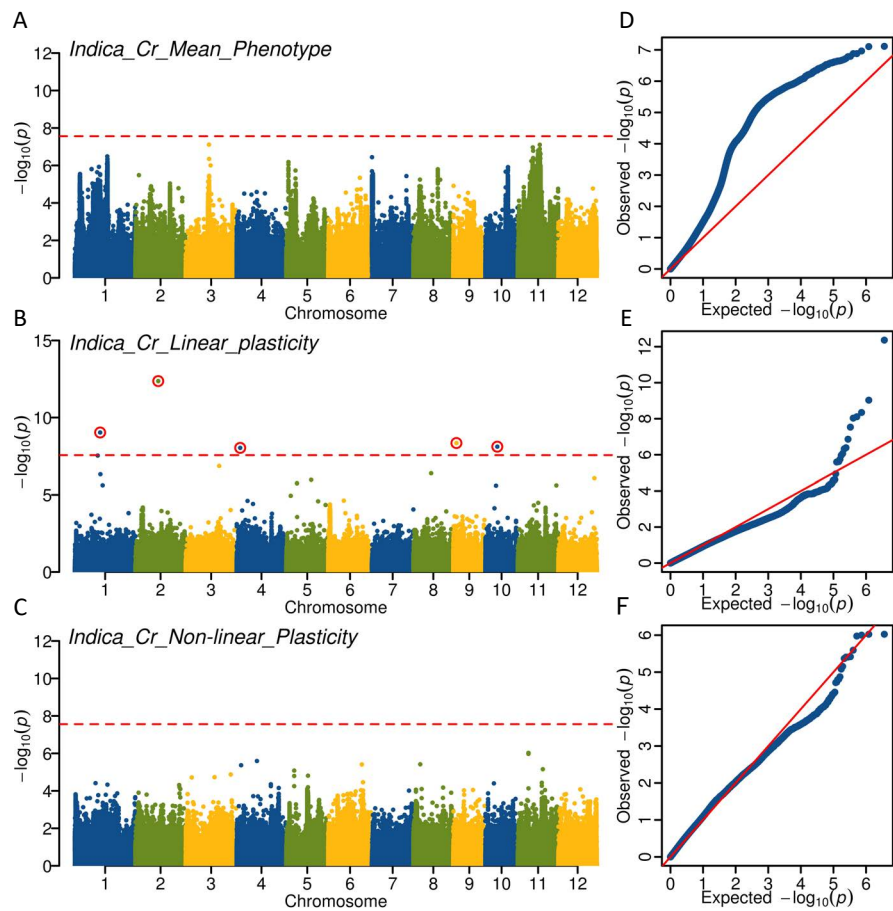

**Fig. S 15** GWAS results of three phenotypic measures of Cr in the *Indica* subspecies. (A-C) Manhattan plots of (A) the mean phenotype, (B) the linear plasticity, and (C) the non-linear plasticity, the horizontal dashed line indicates the threshold at  $2.7 \times 10^{-8}$ . The significantly associated loci (SALs) were labeled with red circles. (D-F) Quantile-quantile plots of the mean phenotype (D), the linear plasticity (E), and the non-linear plasticity (F).

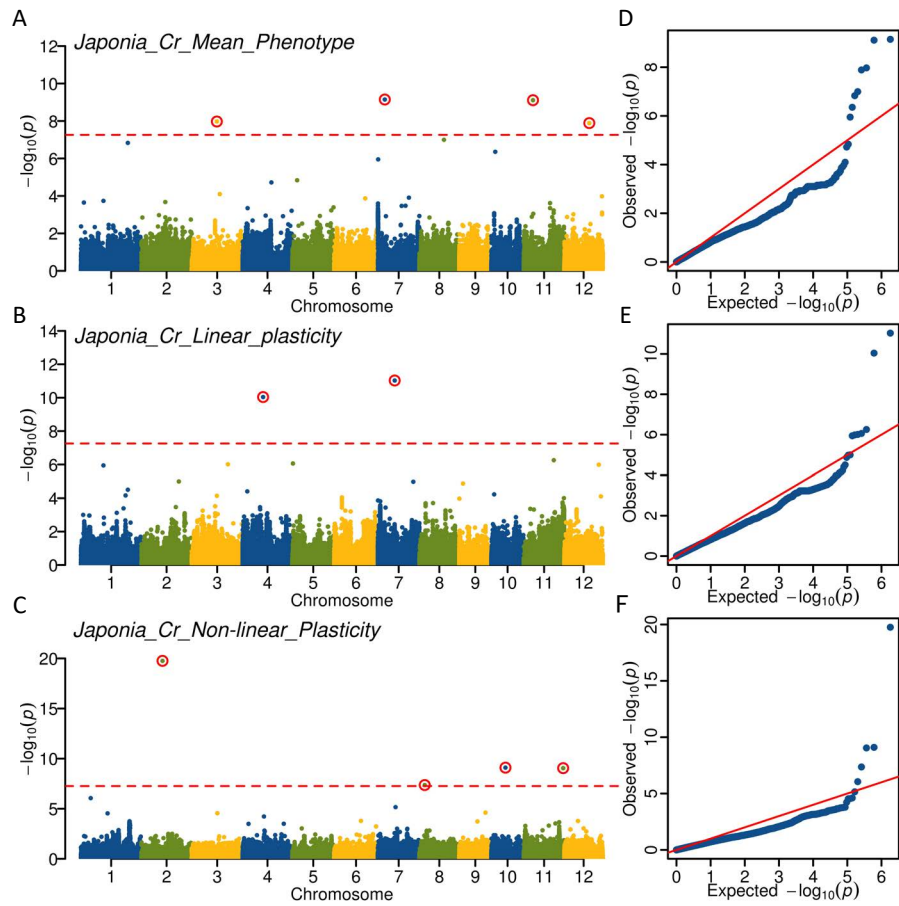

**Fig. S 16** GWAS results of three phenotypic measures of Cr in the *Japonica* subspecies. (A-C) Manhattan plots of (A) the mean phenotype, (B) the linear plasticity, and (C) the non-linear plasticity, the horizontal dashed line indicates the threshold at  $5.5 \times 10^{-8}$ . The significantly associated loci (SALs) were labeled with red circles. (D-F) Quantile-quantile plots of the mean phenotype (D), the linear plasticity (E), and the non-linear plasticity (F).

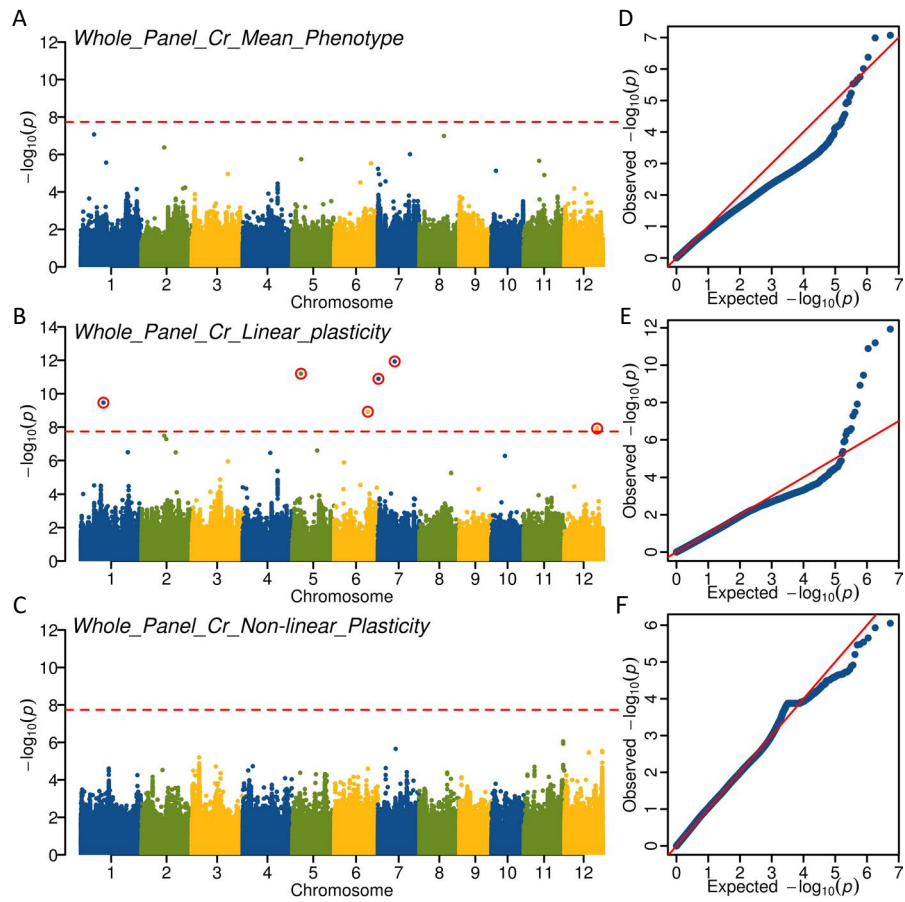

**Fig. S 17** GWAS results of three phenotypic measures of Cr in the whole panel. (A-C) Manhattan plots of (A) the mean phenotype, (B) the linear plasticity, and (C) the non-linear plasticity, the horizontal dashed line indicates the threshold at  $1.8e-8$ . The significantly associated loci (SALs) were labeled with red circles. (D-F) Quantile-quantile plots of the mean phenotype (D), the linear plasticity (E), and the non-linear plasticity (F).

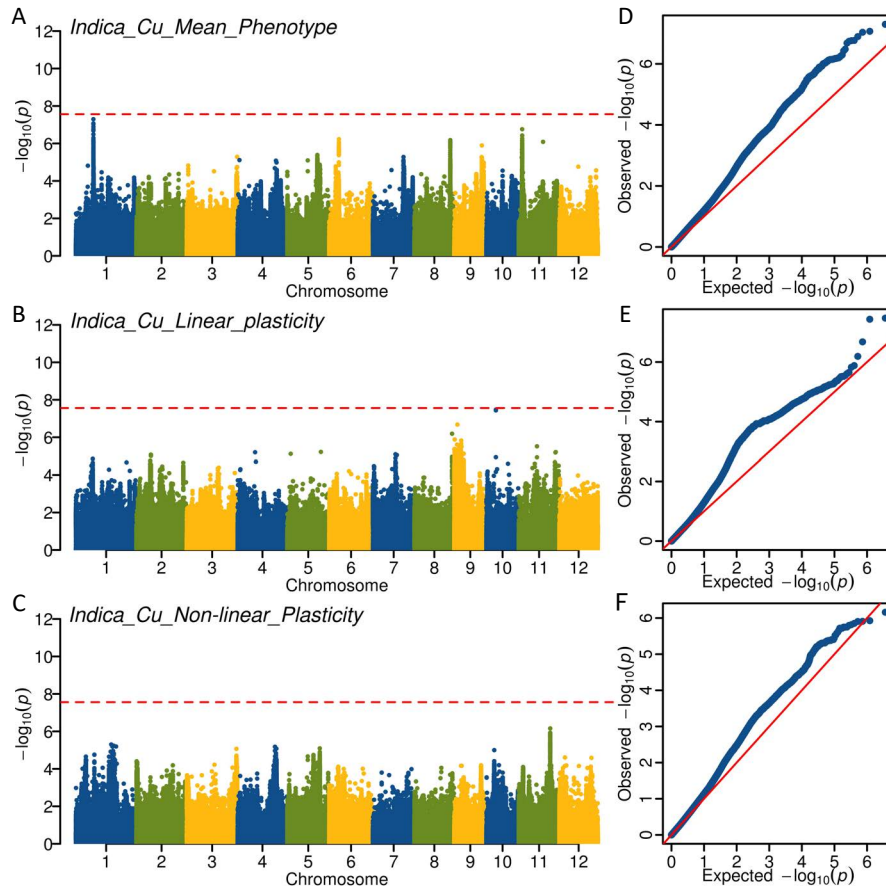

**Fig. S 18** GWAS results of three phenotypic measures of Cu in the *Indica* subspecies. (A-C) Manhattan plots of (A) the mean phenotype, (B) the linear plasticity, and (C) the non-linear plasticity, the horizontal dashed line indicates the threshold at  $2.7 \times 10^{-8}$ . The significantly associated loci (SALs) were labeled with red circles. (D-F) Quantile-quantile plots of the mean phenotype (D), the linear plasticity (E), and the non-linear plasticity (F).

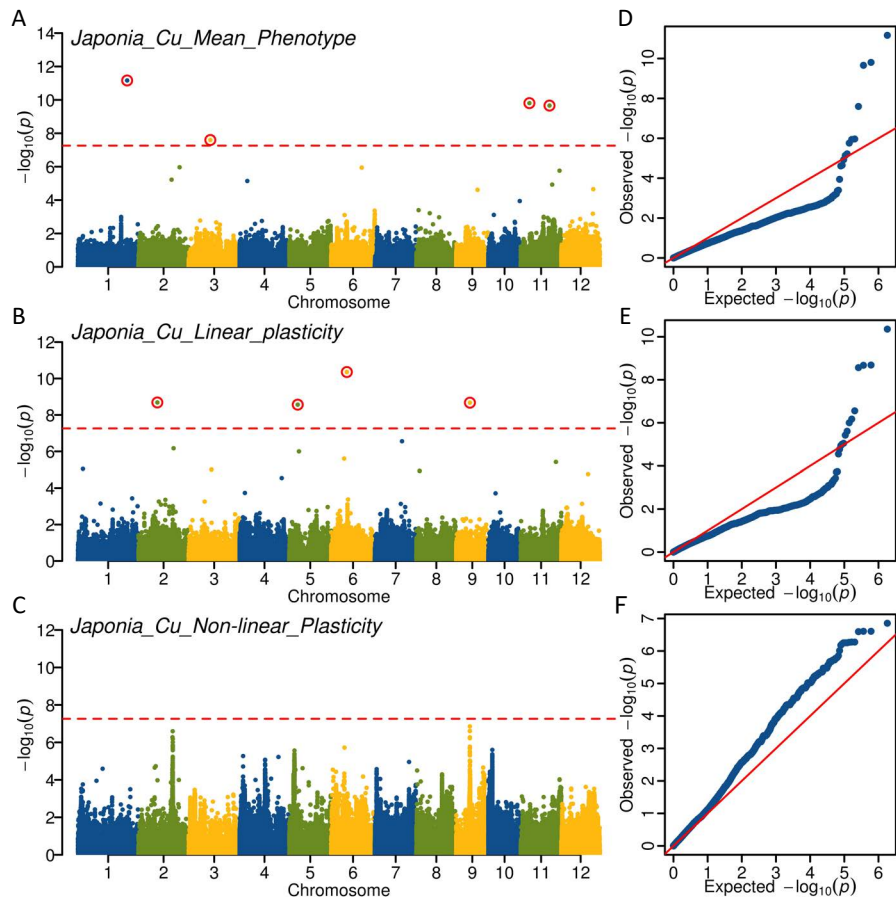

**Fig. S 19** GWAS results of three phenotypic measures of Cu in the *Japonica* subspecies. (A-C) Manhattan plots of (A) the mean phenotype, (B) the linear plasticity, and (C) the non-linear plasticity, the horizontal dashed line indicates the threshold at  $5.5 \times 10^{-8}$ . The significantly associated loci (SALs) were labeled with red circles. (D-F) Quantile-quantile plots of the mean phenotype (D), the linear plasticity (E), and the non-linear plasticity (F).

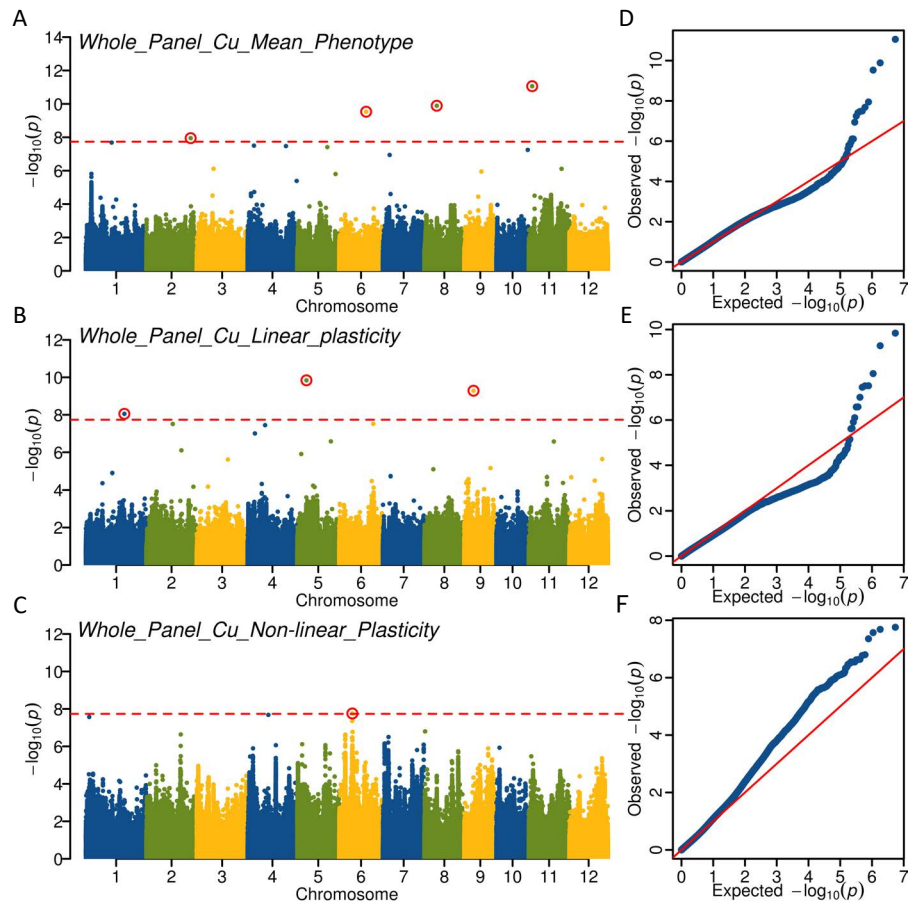

**Fig. S 20** GWAS results of three phenotypic measures of Cu in the whole panel. (A-C) Manhattan plots of (A) the mean phenotype, (B) the linear plasticity, and (C) the non-linear plasticity, the horizontal dashed line indicates the threshold at  $1.8 \times 10^{-8}$ . The significantly associated loci (SALs) were labeled with red circles. (D-F) Quantile-quantile plots of the mean phenotype (D), the linear plasticity (E), and the non-linear plasticity (F).

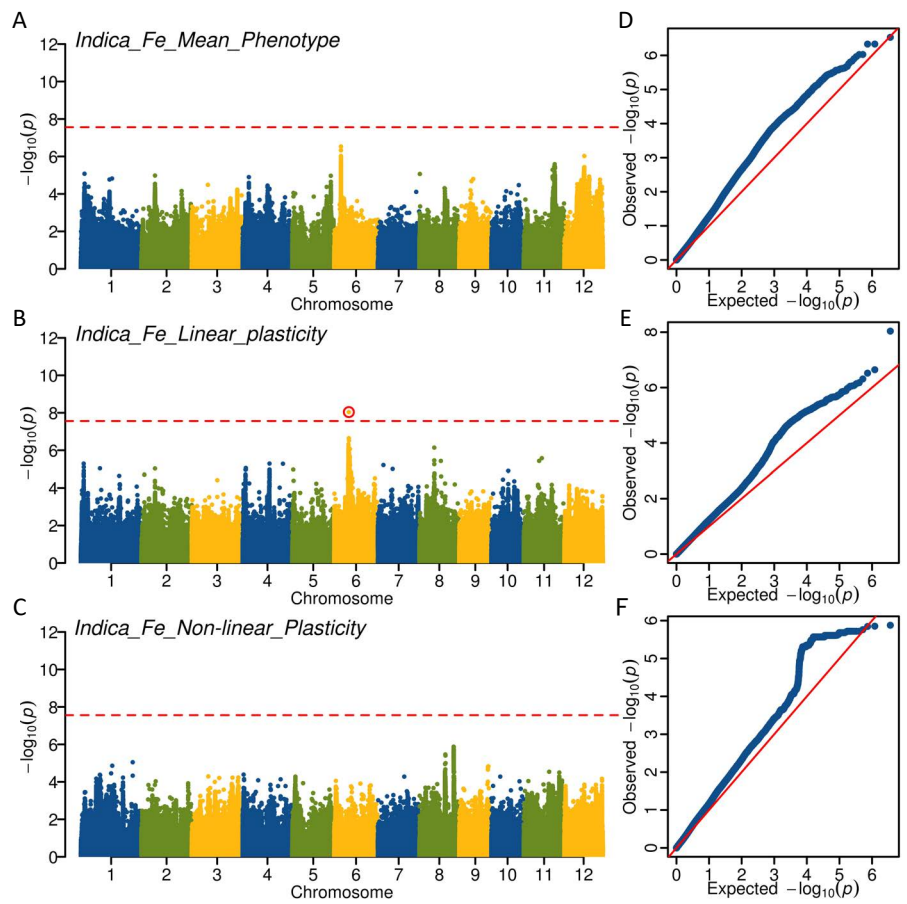

**Fig. S 21** GWAS results of three phenotypic measures of Fe in the *Indica* subspecies. (A-C) Manhattan plots of (A) the mean phenotype, (B) the linear plasticity, and (C) the non-linear plasticity, the horizontal dashed line indicates the threshold at  $2.7 \times 10^{-8}$ . The significantly associated loci (SALs) were labeled with red circles. (D-F) Quantile-quantile plots of the mean phenotype (D), the linear plasticity (E), and the non-linear plasticity (F).

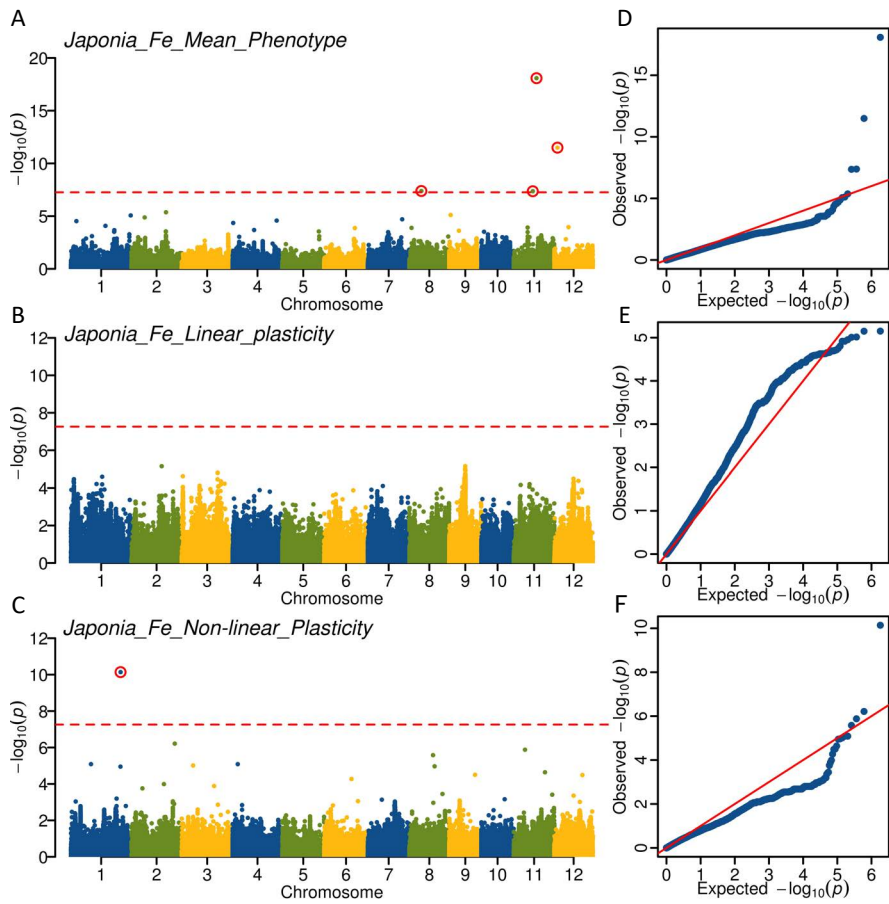

**Fig. S 22** GWAS results of three phenotypic measures of Fe in the *Japonica* subspecies. (A-C) Manhattan plots of (A) the mean phenotype, (B) the linear plasticity, and (C) the non-linear plasticity, the horizontal dashed line indicates the threshold at  $5.5 \times 10^{-8}$ . The significantly associated loci (SALs) were labeled with red circles. (D-F) Quantile-quantile plots of the mean phenotype (D), the linear plasticity (E), and the non-linear plasticity (F).



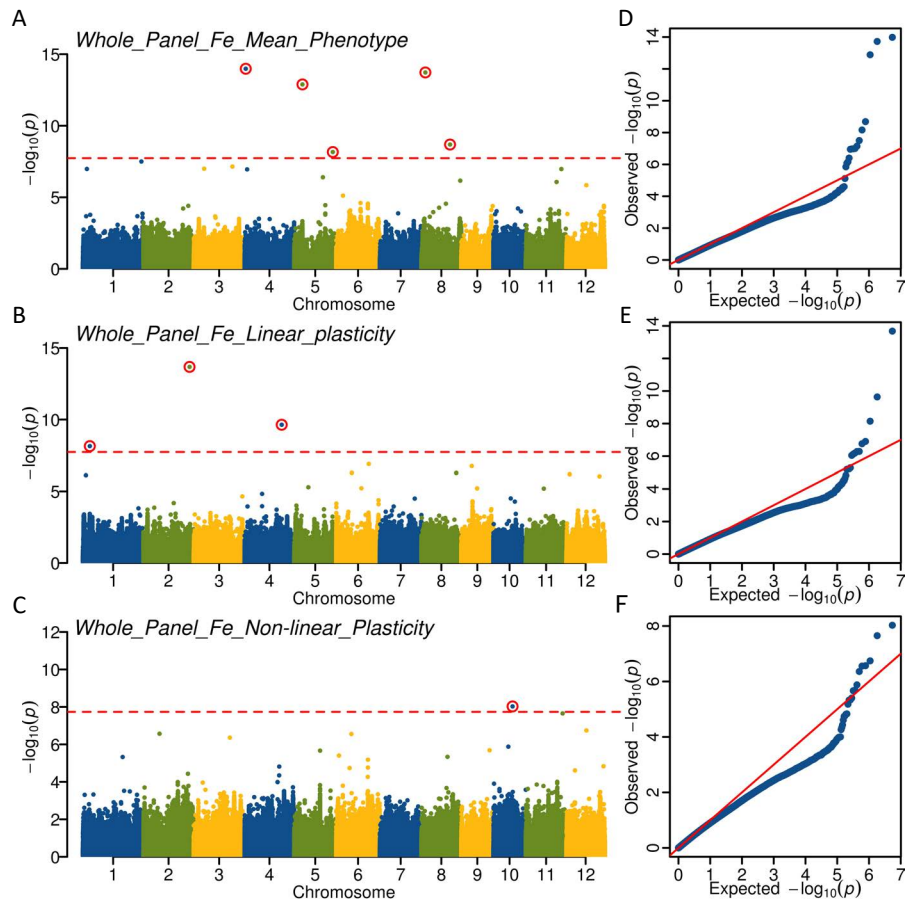

**Fig. S 23** GWAS results of three phenotypic measures of Fe in the whole panel. (A-C) Manhattan plots of (A) the mean phenotype, (B) the linear plasticity, and (C) the non-linear plasticity, the horizontal dashed line indicates the threshold at  $1.8e-8$ . The significantly associated loci (SALs) were labeled with red circles. (D-F) Quantile-quantile plots of the mean phenotype (D), the linear plasticity (E), and the non-linear plasticity (F).

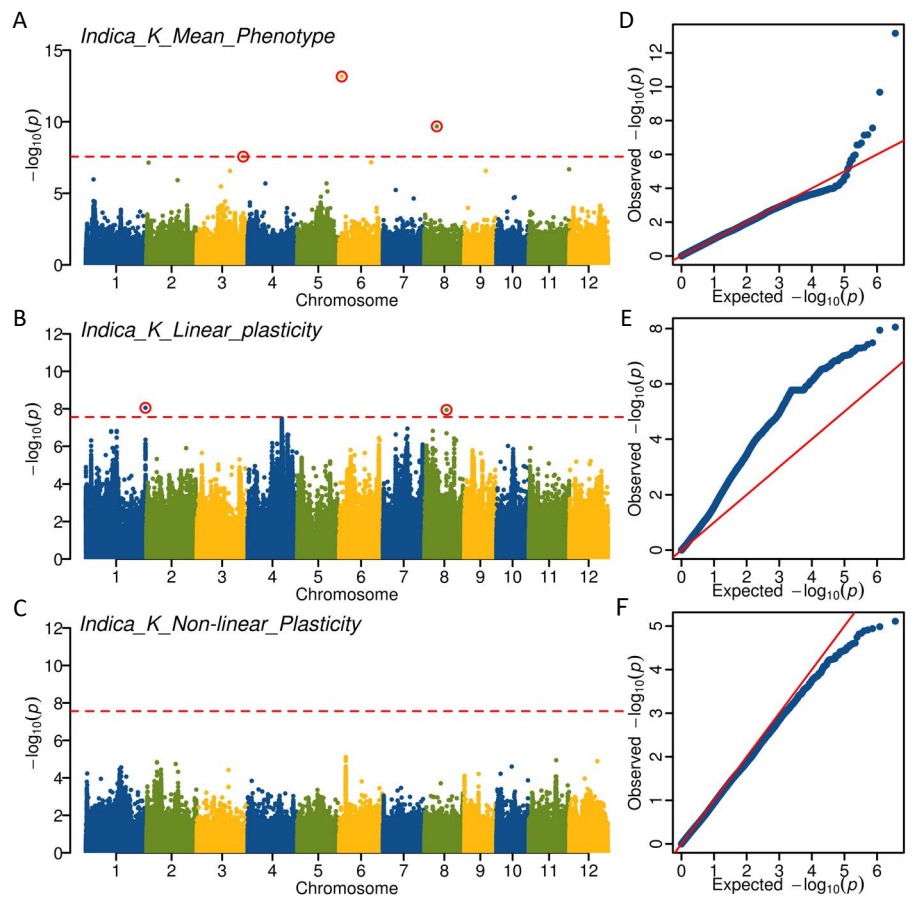

**Fig. S 24** GWAS results of three phenotypic measures of K in the *Indica* subspecies. (A-C) Manhattan plots of (A) the mean phenotype, (B) the linear plasticity, and (C) the non-linear plasticity, the horizontal dashed line indicates the threshold at  $2.7 \times 10^{-8}$ . The significantly associated loci (SALs) were labeled with red circles. (D-F) Quantile-quantile plots of the mean phenotype (D), the linear plasticity (E), and the non-linear plasticity (F).

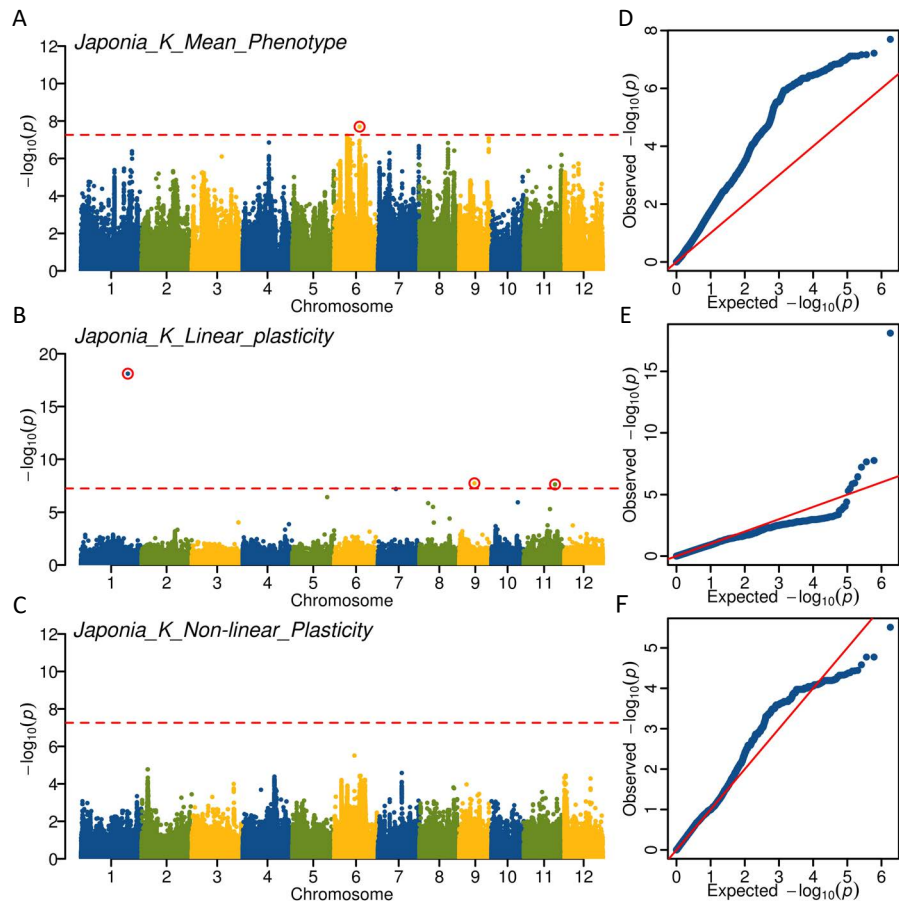

**Fig. S 25** GWAS results of three phenotypic measures of K in the *Japonica* subspecies. (A-C) Manhattan plots of (A) the mean phenotype, (B) the linear plasticity, and (C) the non-linear plasticity, the horizontal dashed line indicates the threshold at  $5.5 \times 10^{-8}$ . The significantly associated loci (SALs) were labeled with red circles. (D-F) Quantile-quantile plots of the mean phenotype (D), the linear plasticity (E), and the non-linear plasticity (F).

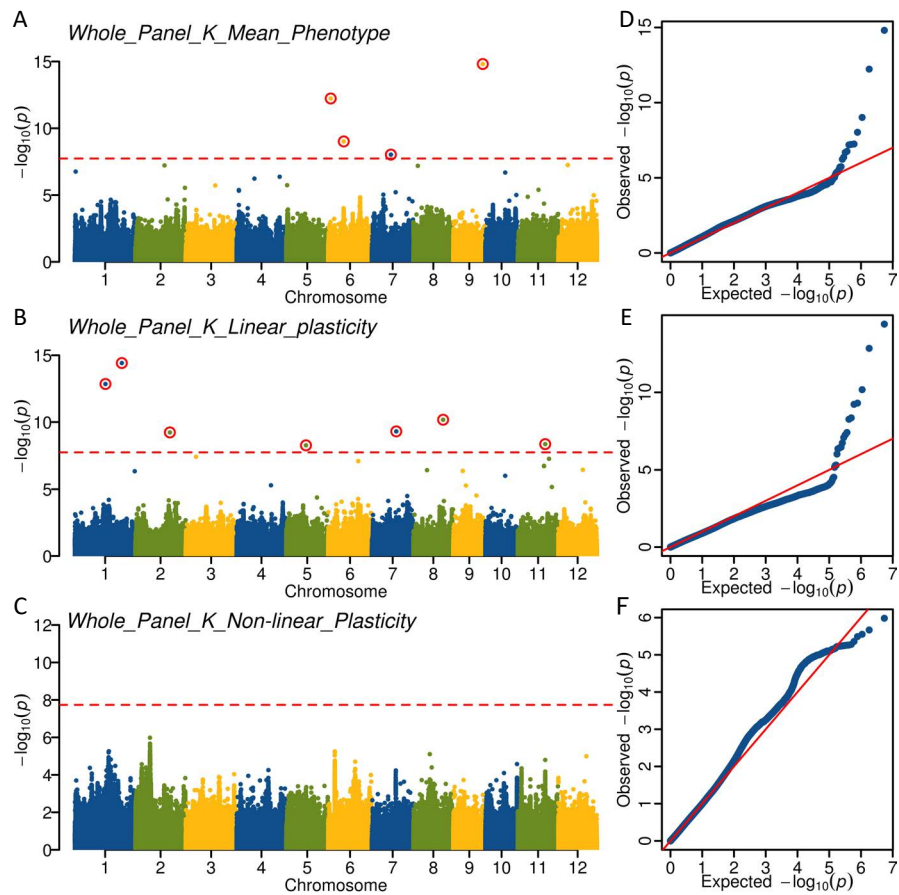

**Fig. S 26** GWAS results of three phenotypic measures of K in the whole panel. (A-C) Manhattan plots of (A) the mean phenotype, (B) the linear plasticity, and (C) the non-linear plasticity, the horizontal dashed line indicates the threshold at  $1.8e-8$ . The significantly associated loci (SALs) were labeled with red circles. (D-F) Quantile-quantile plots of the mean phenotype (D), the linear plasticity (E), and the non-linear plasticity (F).

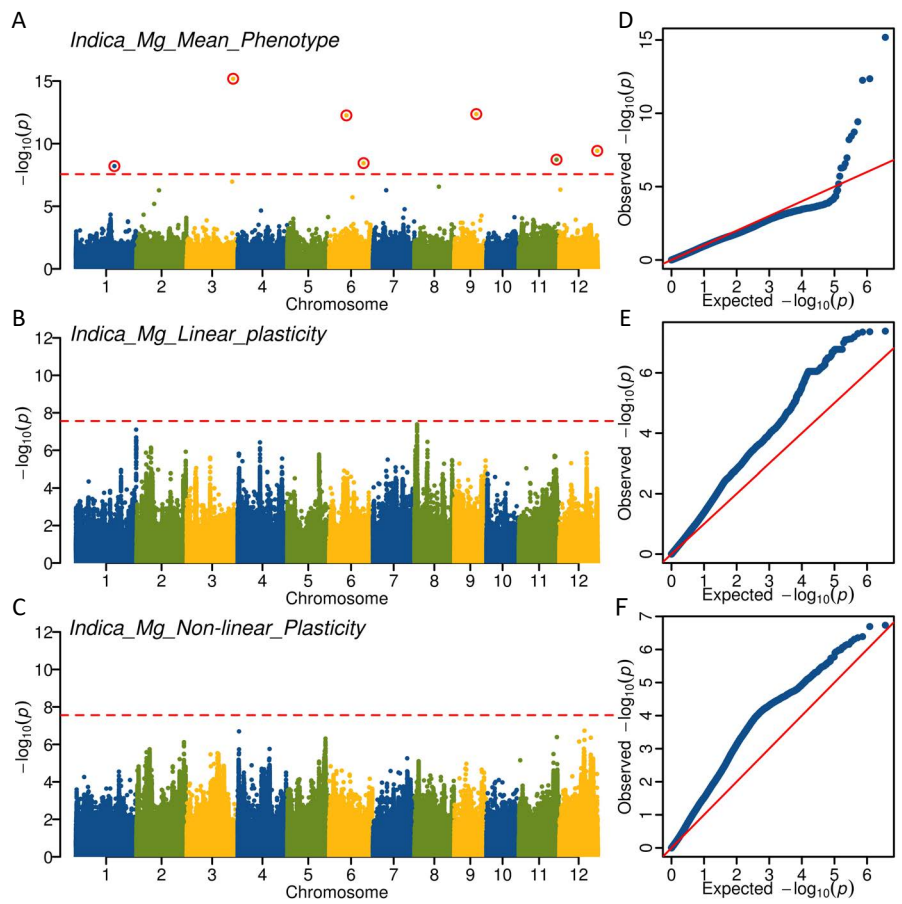

**Fig. S 27** GWAS results of three phenotypic measures of Mg in the *Indica* subspecies. (A-C) Manhattan plots of (A) the mean phenotype, (B) the linear plasticity, and (C) the non-linear plasticity, the horizontal dashed line indicates the threshold at  $2.7 \times 10^{-8}$ . The significantly associated loci (SALs) were labeled with red circles. (D-F) Quantile-quantile plots of the mean phenotype (D), the linear plasticity (E), and the non-linear plasticity (F).

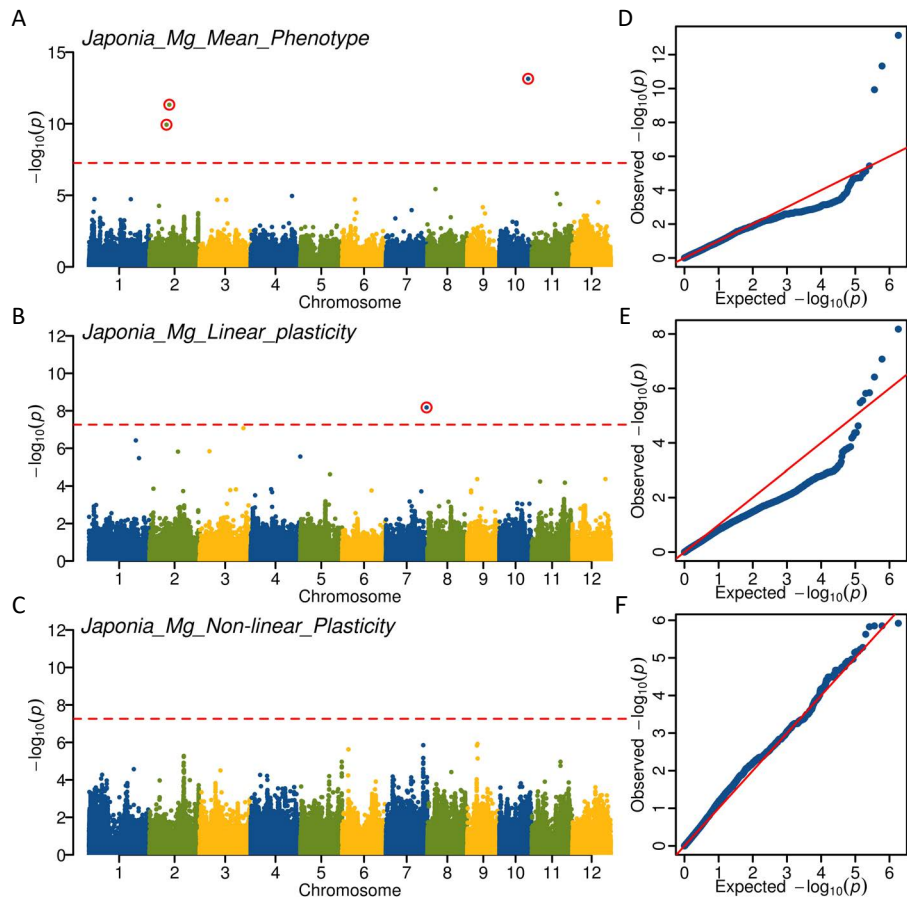

**Fig. S 28** GWAS results of three phenotypic measures of Mg in the *Japonica* subspecies. (A-C) Manhattan plots of (A) the mean phenotype, (B) the linear plasticity, and (C) the non-linear plasticity, the horizontal dashed line indicates the threshold at  $5.5 \times 10^{-8}$ . The significantly associated loci (SALs) were labeled with red circles. (D-F) Quantile-quantile plots of the mean phenotype (D), the linear plasticity (E), and the non-linear plasticity (F).

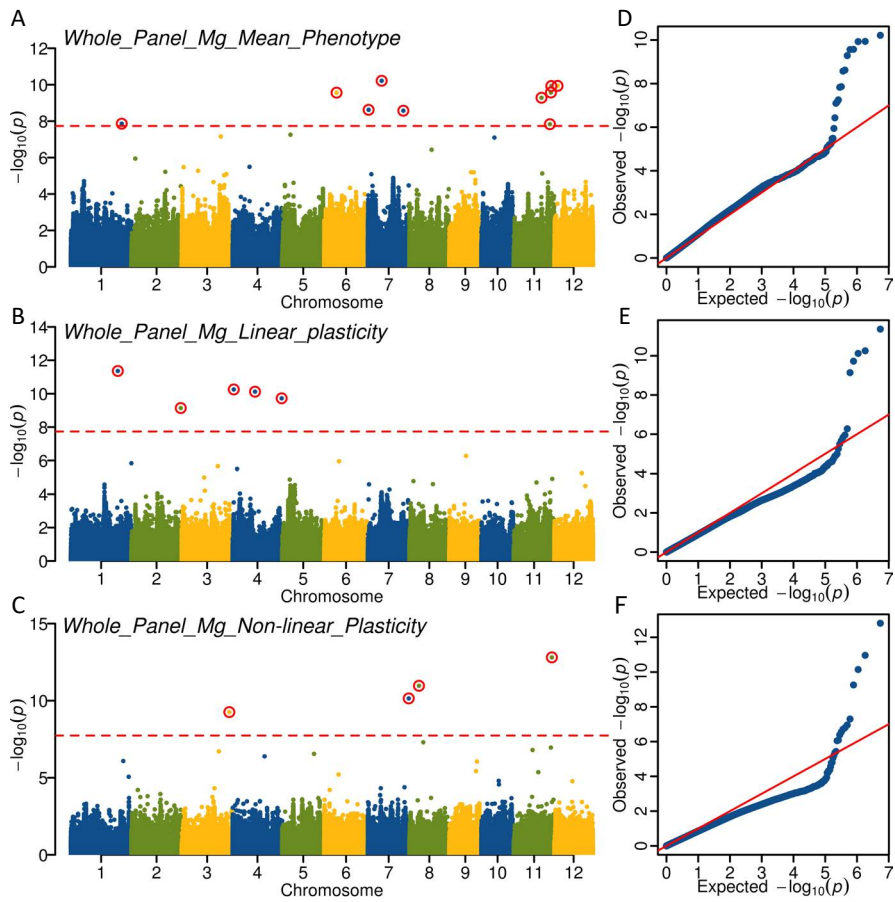

**Fig. S 29** GWAS results of three phenotypic measures of Mg in the whole panel. (A-C) Manhattan plots of (A) the mean phenotype, (B) the linear plasticity, and (C) the non-linear plasticity, the horizontal dashed line indicates the threshold at  $1.8 \times 10^{-8}$ . The significantly associated loci (SALs) were labeled with red circles. (D-F) Quantile-quantile plots of the mean phenotype (D), the linear plasticity (E), and the non-linear plasticity (F).

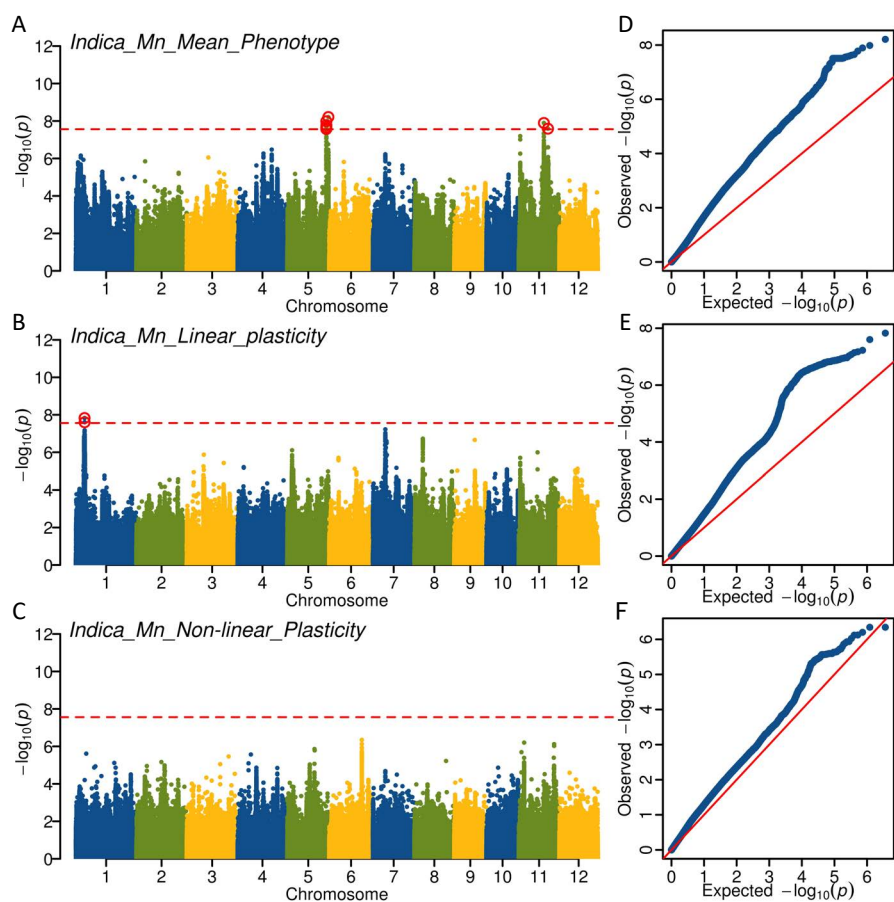

**Fig. S 30** GWAS results of three phenotypic measures of Mn in the *Indica* subspecies. (A-C) Manhattan plots of (A) the mean phenotype, (B) the linear plasticity, and (C) the non-linear plasticity, the horizontal dashed line indicates the threshold at  $2.7 \times 10^{-8}$ . The significantly associated loci (SALs) were labeled with red circles. (D-F) Quantile-quantile plots of the mean phenotype (D), the linear plasticity (E), and the non-linear plasticity (F).



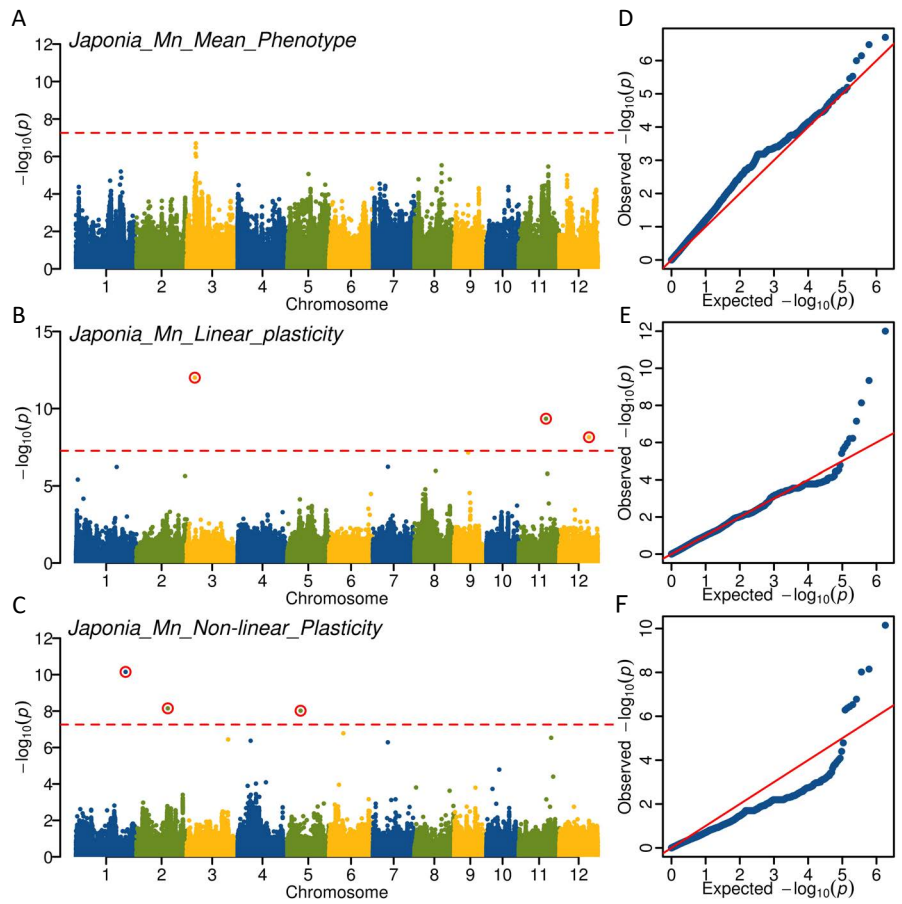

**Fig. S 31** GWAS results of three phenotypic measures of Mn in the *Japonica* subspecies. (A-C) Manhattan plots of (A) the mean phenotype, (B) the linear plasticity, and (C) the non-linear plasticity, the horizontal dashed line indicates the threshold at  $5.5 \times 10^{-8}$ . The significantly associated loci (SALs) were labeled with red circles. (D-F) Quantile-quantile plots of the mean phenotype (D), the linear plasticity (E), and the non-linear plasticity (F).

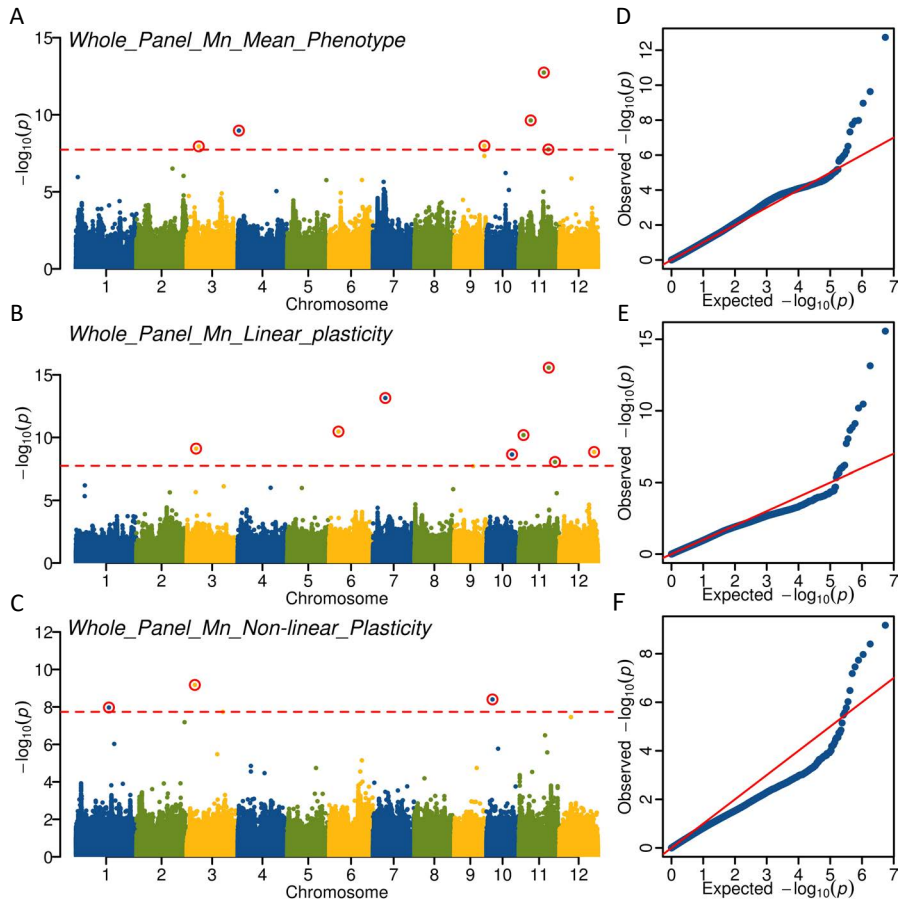

**Fig. S 32** GWAS results of three phenotypic measures of Mn in the whole panel. (A-C) Manhattan plots of (A) the mean phenotype, (B) the linear plasticity, and (C) the non-linear plasticity, the horizontal dashed line indicates the threshold at  $1.8e-8$ . The significantly associated loci (SALs) were labeled with red circles. (D-F) Quantile-quantile plots of the mean phenotype (D), the linear plasticity (E), and the non-linear plasticity (F).

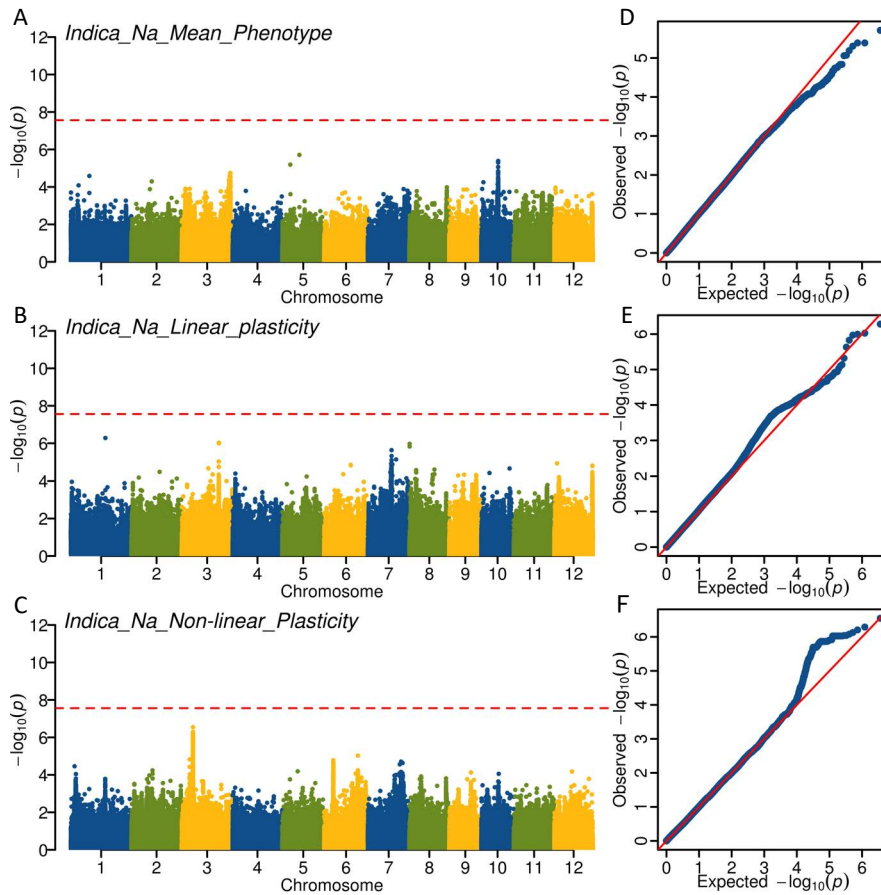

**Fig. S 33** GWAS results of three phenotypic measures of Na in the *Indica* subspecies. (A-C) Manhattan plots of (A) the mean phenotype, (B) the linear plasticity, and (C) the non-linear plasticity, the horizontal dashed line indicates the threshold at  $2.7 \times 10^{-8}$ . The significantly associated loci (SALs) were labeled with red circles. (D-F) Quantile-quantile plots of the mean phenotype (D), the linear plasticity (E), and the non-linear plasticity (F).

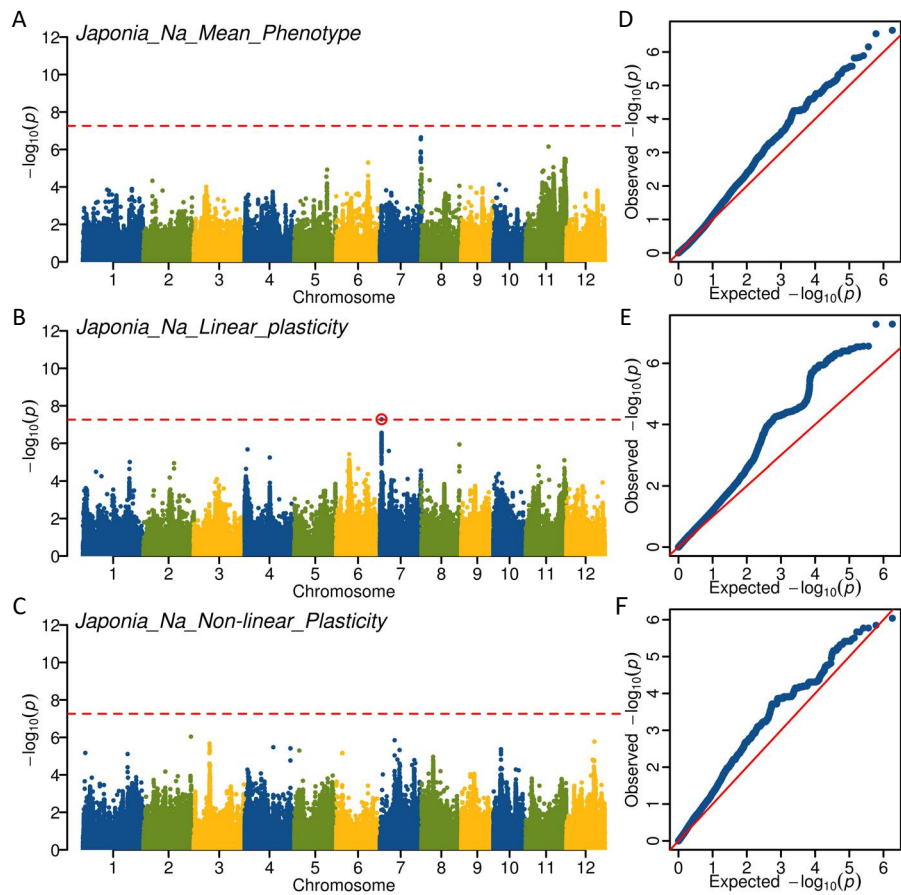

**Fig. S 34** GWAS results of three phenotypic measures of Na in the *Japonica* subspecies. (A-C) Manhattan plots of (A) the mean phenotype, (B) the linear plasticity, and (C) the non-linear plasticity, the horizontal dashed line indicates the threshold at  $5.5 \times 10^{-8}$ . The significantly associated loci (SALs) were labeled with red circles. (D-F) Quantile-quantile plots of the mean phenotype (D), the linear plasticity (E), and the non-linear plasticity (F).

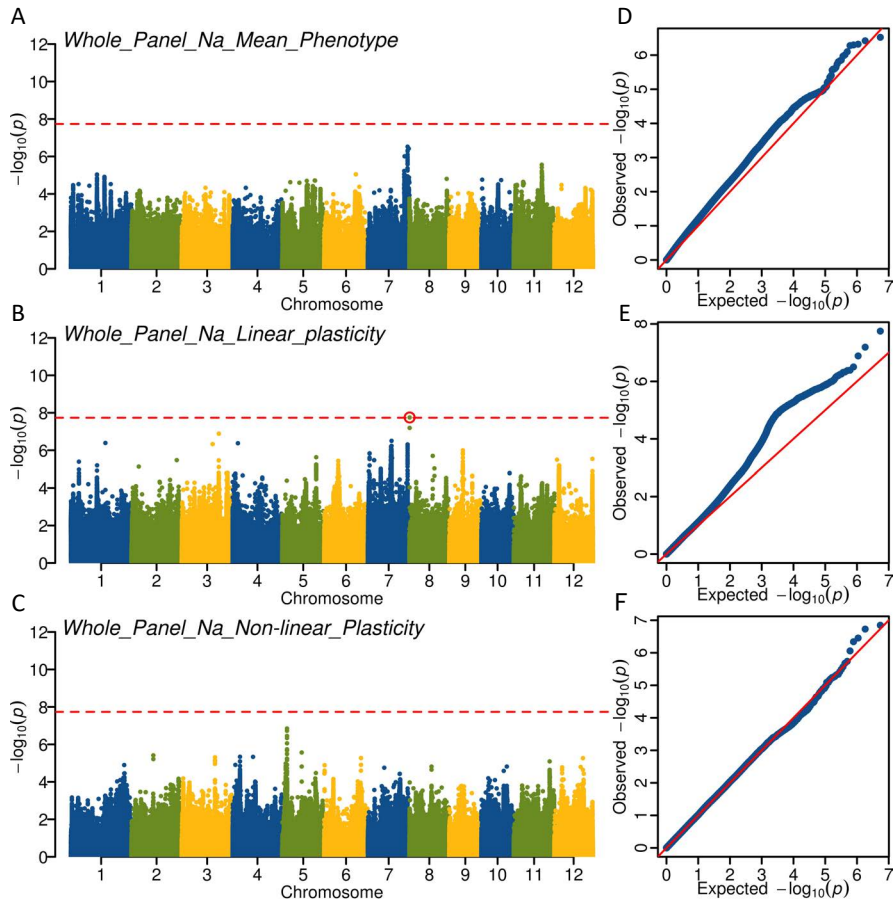

**Fig. S 35** GWAS results of three phenotypic measures of Na in the whole panel. (A-C) Manhattan plots of (A) the mean phenotype, (B) the linear plasticity, and (C) the non-linear plasticity, the horizontal dashed line indicates the threshold at  $1.8e-8$ . The significantly associated loci (SALs) were labeled with red circles. (D-F) Quantile-quantile plots of the mean phenotype (D), the linear plasticity (E), and the non-linear plasticity (F).

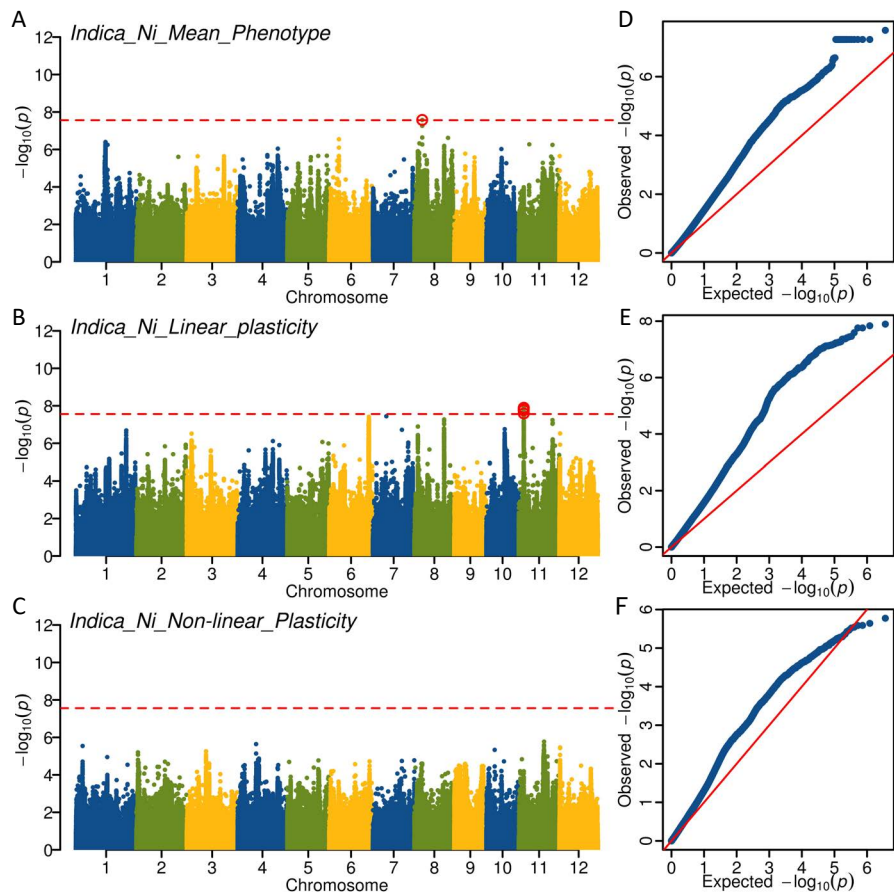

**Fig. S 36** GWAS results of three phenotypic measures of Ni in the *Indica* subspecies. (A-C) Manhattan plots of (A) the mean phenotype, (B) the linear plasticity, and (C) the non-linear plasticity, the horizontal dashed line indicates the threshold at  $2.7 \times 10^{-8}$ . The significantly associated loci (SALs) were labeled with red circles. (D-F) Quantile-quantile plots of the mean phenotype (D), the linear plasticity (E), and the non-linear plasticity (F).

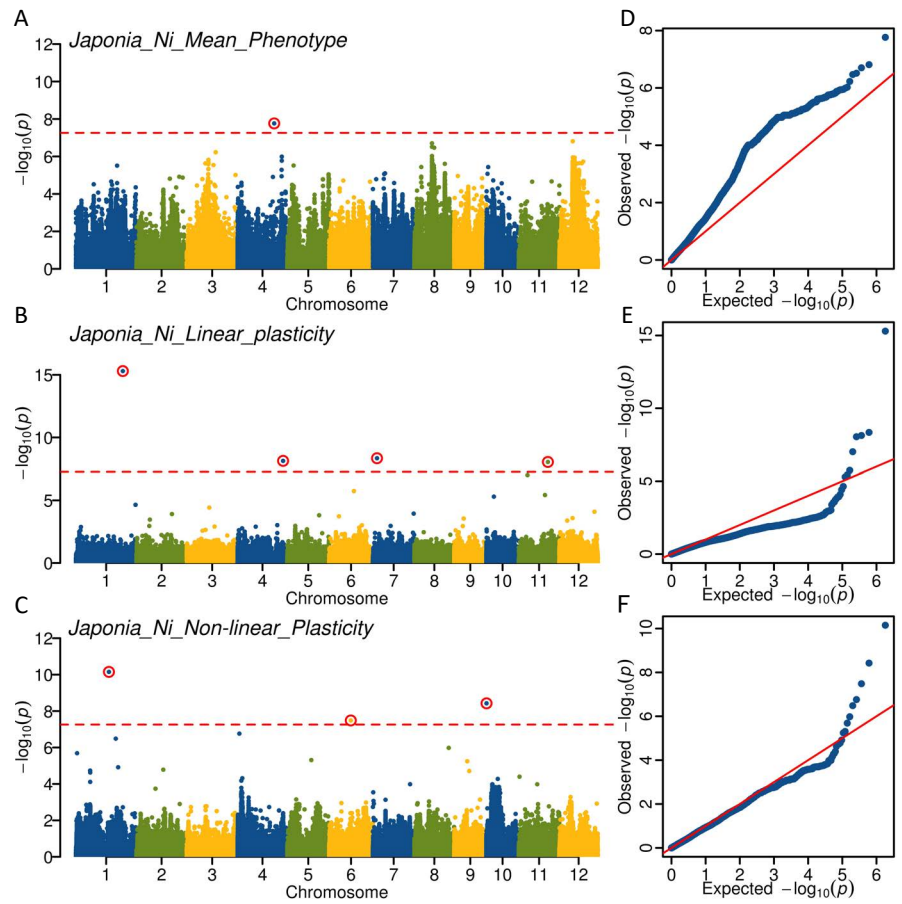

**Fig. S 37** GWAS results of three phenotypic measures of Ni in the *Japonica* subspecies. (A-C) Manhattan plots of (A) the mean phenotype, (B) the linear plasticity, and (C) the non-linear plasticity, the horizontal dashed line indicates the threshold at  $5.5 \times 10^{-8}$ . The significantly associated loci (SALs) were labeled with red circles. (D-F) Quantile-quantile plots of the mean phenotype (D), the linear plasticity (E), and the non-linear plasticity (F).

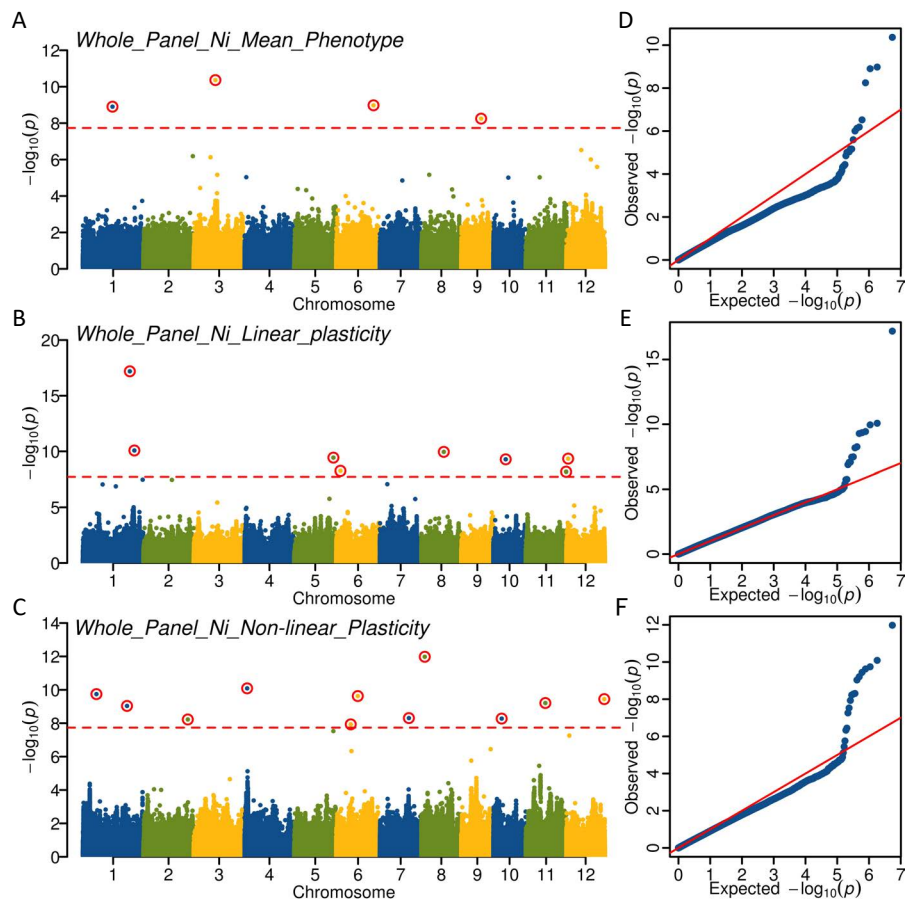

**Fig. S 38** GWAS results of three phenotypic measures of Ni in the whole panel. (A-C) Manhattan plots of (A) the mean phenotype, (B) the linear plasticity, and (C) the non-linear plasticity, the horizontal dashed line indicates the threshold at  $1.8 \times 10^{-8}$ . The significantly associated loci (SALs) were labeled with red circles. (D-F) Quantile-quantile plots of the mean phenotype (D), the linear plasticity (E), and the non-linear plasticity (F).



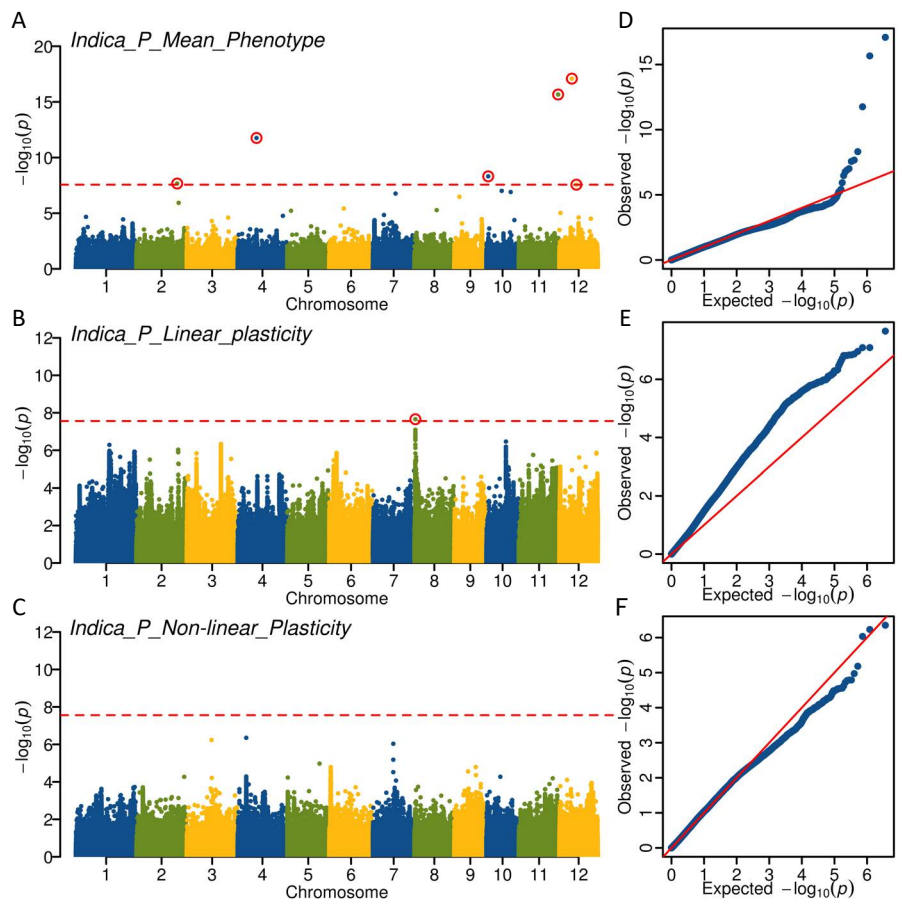

**Fig. S 39** GWAS results of three phenotypic measures of P in the *Indica* subspecies. (A-C) Manhattan plots of (A) the mean phenotype, (B) the linear plasticity, and (C) the non-linear plasticity, the horizontal dashed line indicates the threshold at  $2.7 \times 10^{-8}$ . The significantly associated loci (SALs) were labeled with red circles. (D-F) Quantile-quantile plots of the mean phenotype (D), the linear plasticity (E), and the non-linear plasticity (F).

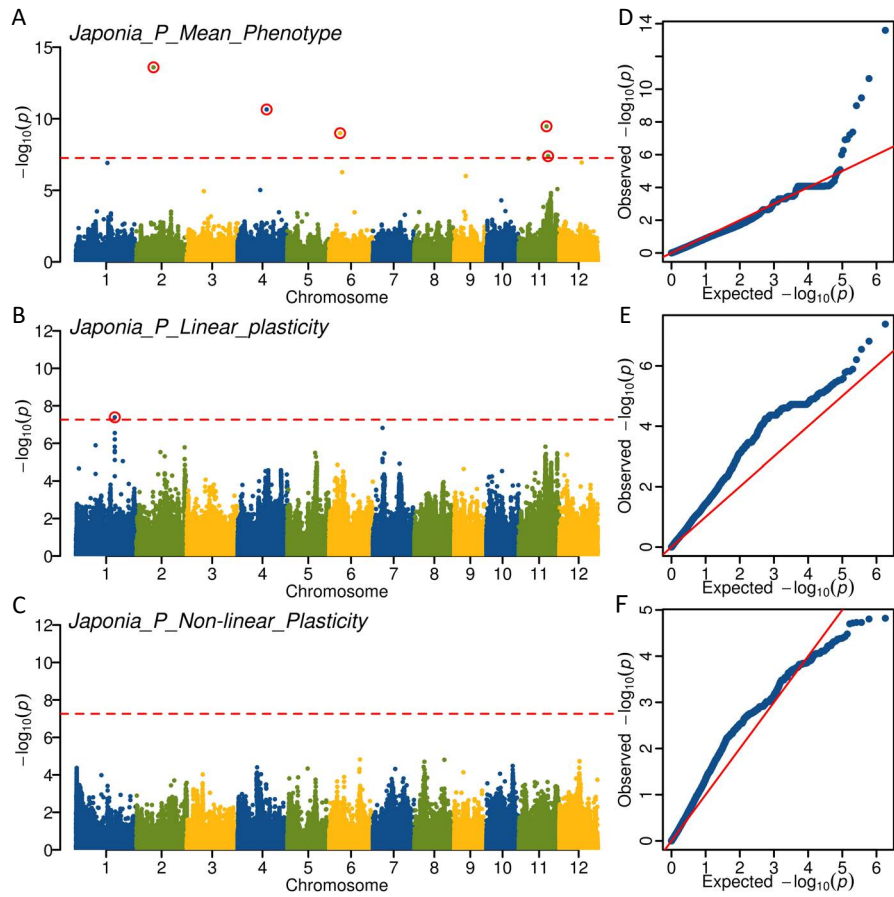

**Fig. S 40** GWAS results of three phenotypic measures of P in the *Japonica* subspecies. (A-C) Manhattan plots of (A) the mean phenotype, (B) the linear plasticity, and (C) the non-linear plasticity, the horizontal dashed line indicates the threshold at  $5.5 \times 10^{-8}$ . The significantly associated loci (SALs) were labeled with red circles. (D-F) Quantile-quantile plots of the mean phenotype (D), the linear plasticity (E), and the non-linear plasticity (F).

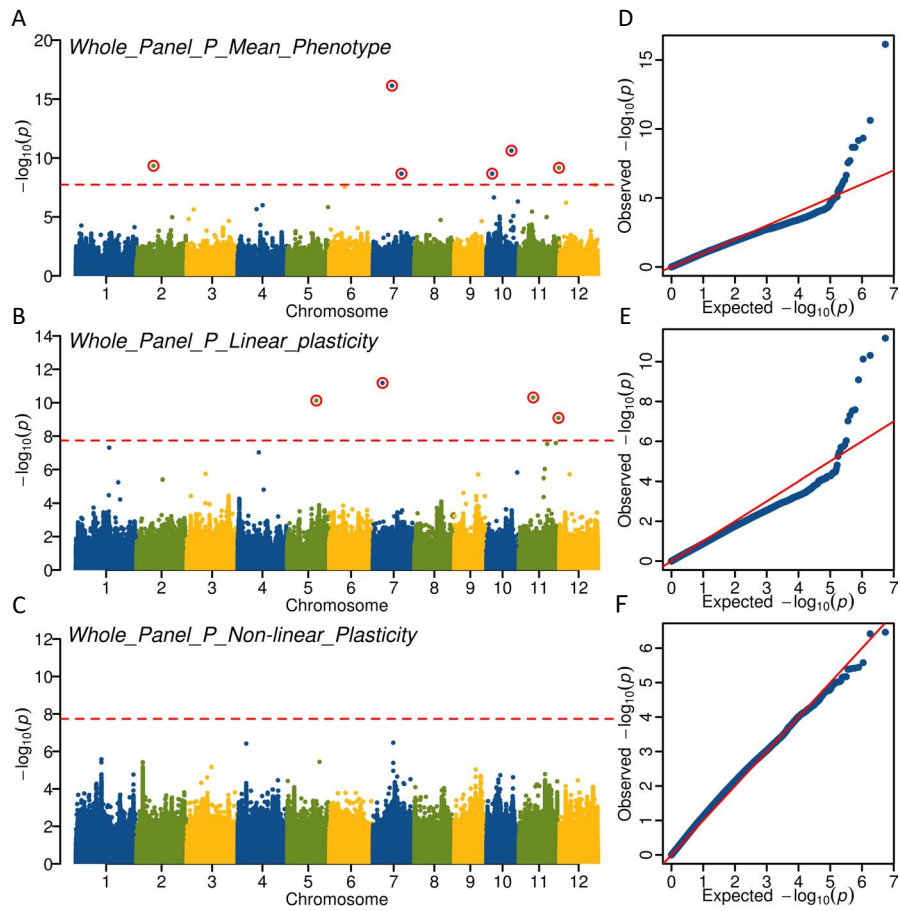

**Fig. S 41** GWAS results of three phenotypic measures of P in the whole panel. (A-C) Manhattan plots of (A) the mean phenotype, (B) the linear plasticity, and (C) the non-linear plasticity, the horizontal dashed line indicates the threshold at  $1.8 \times 10^{-8}$ . The significantly associated loci (SALs) were labeled with red circles. (D-F) Quantile-quantile plots of the mean phenotype (D), the linear plasticity (E), and the non-linear plasticity (F).

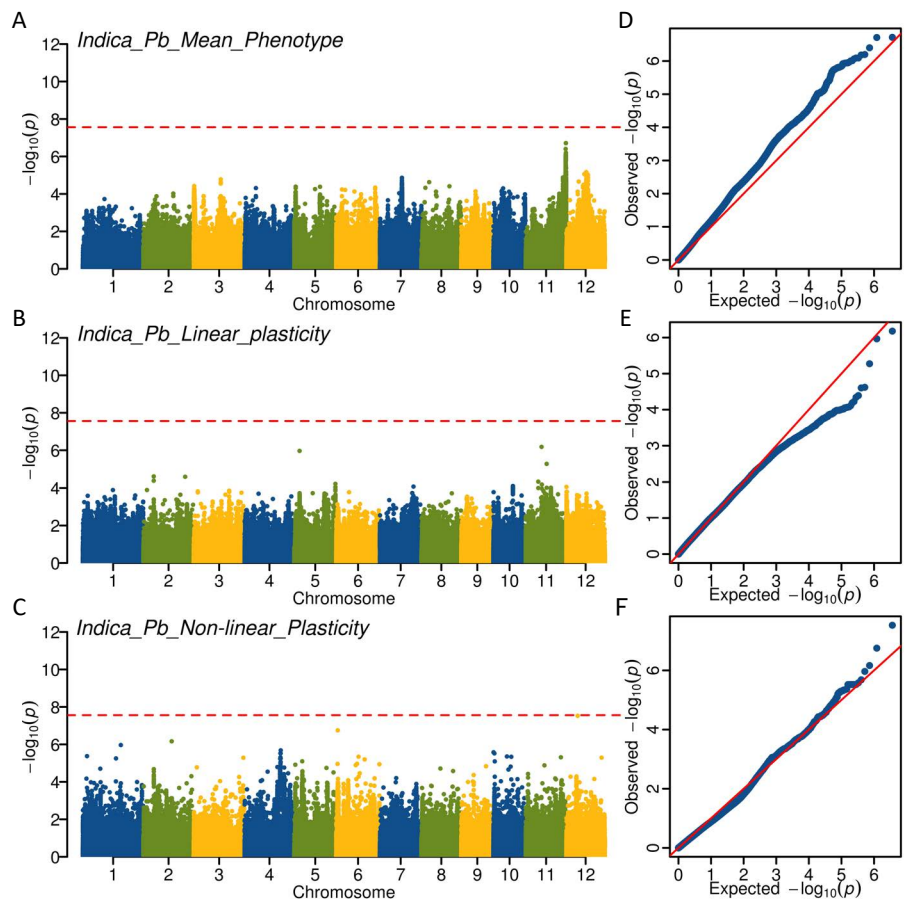

**Fig. S 42** GWAS results of three phenotypic measures of Pb in the *Indica* subspecies. (A-C) Manhattan plots of (A) the mean phenotype, (B) the linear plasticity, and (C) the non-linear plasticity, the horizontal dashed line indicates the threshold at  $2.7 \times 10^{-8}$ . The significantly associated loci (SALs) were labeled with red circles. (D-F) Quantile-quantile plots of the mean phenotype (D), the linear plasticity (E), and the non-linear plasticity (F).

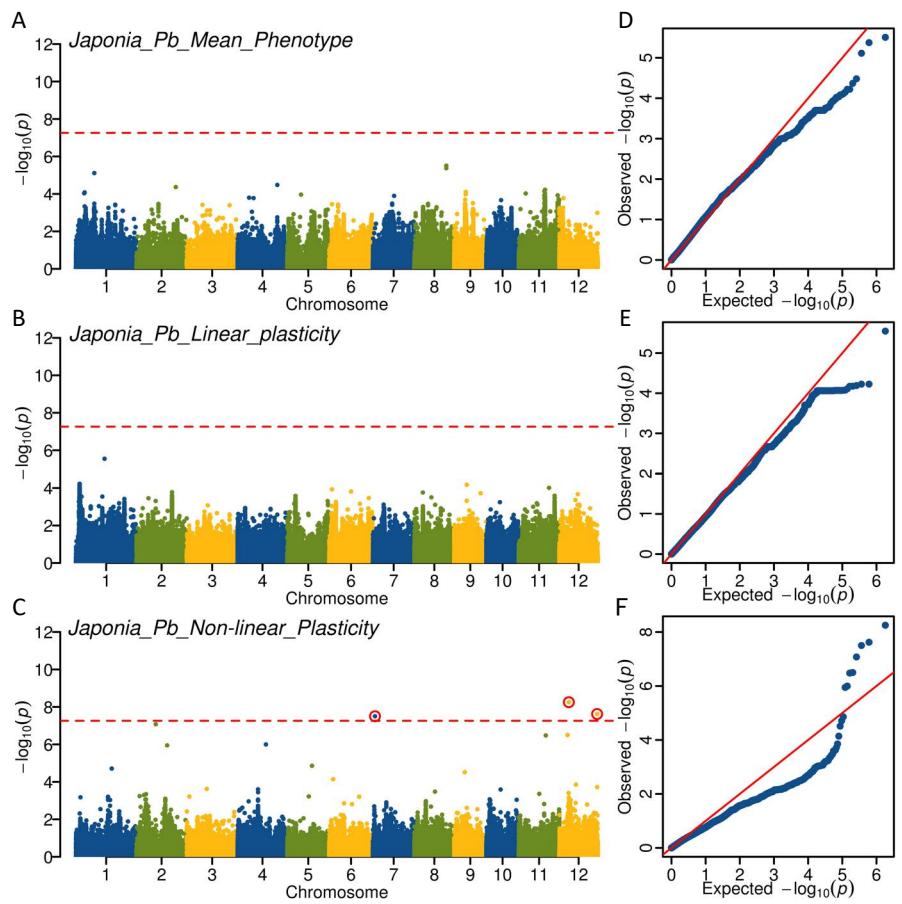

**Fig. S 43** GWAS results of three phenotypic measures of Pb in the *Japonica* subspecies. (A-C) Manhattan plots of (A) the mean phenotype, (B) the linear plasticity, and (C) the non-linear plasticity, the horizontal dashed line indicates the threshold at  $5.5 \times 10^{-8}$ . The significantly associated loci (SALs) were labeled with red circles. (D-F) Quantile-quantile plots of the mean phenotype (D), the linear plasticity (E), and the non-linear plasticity (F).

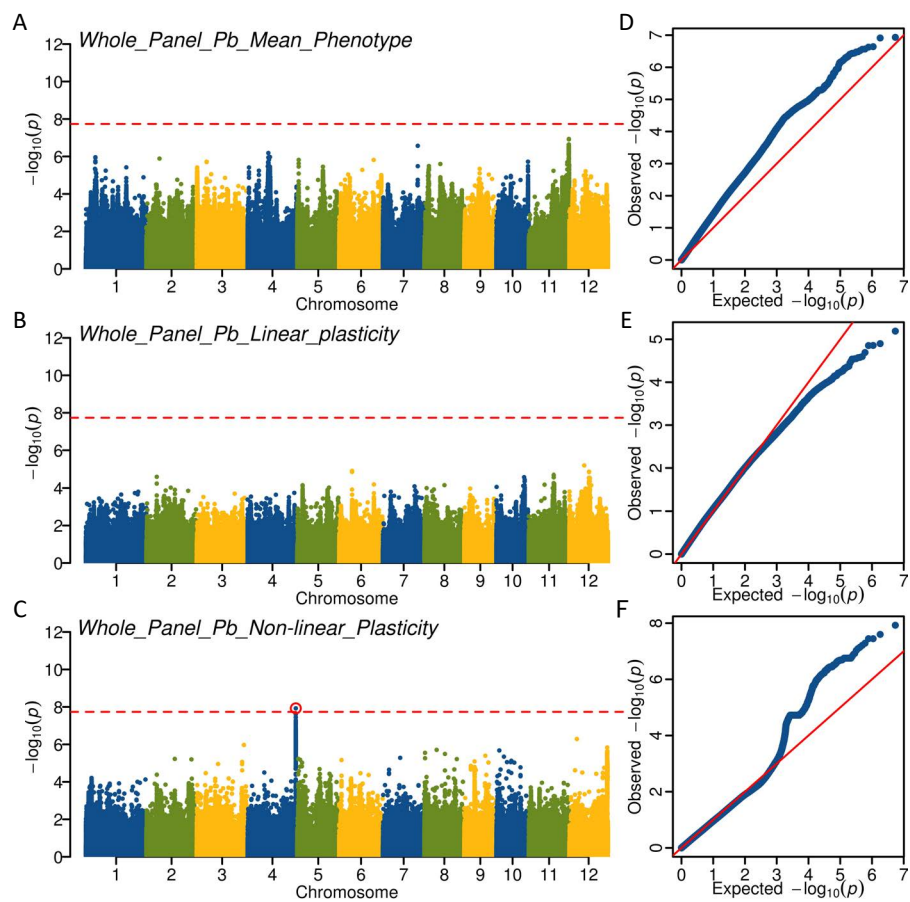

**Fig. S 44** GWAS results of three phenotypic measures of Pb in the whole panel. (A-C) Manhattan plots of (A) the mean phenotype, (B) the linear plasticity, and (C) the non-linear plasticity, the horizontal dashed line indicates the threshold at  $1.8 \times 10^{-8}$ . The significantly associated loci (SALs) were labeled with red circles. (D-F) Quantile-quantile plots of the mean phenotype (D), the linear plasticity (E), and the non-linear plasticity (F).

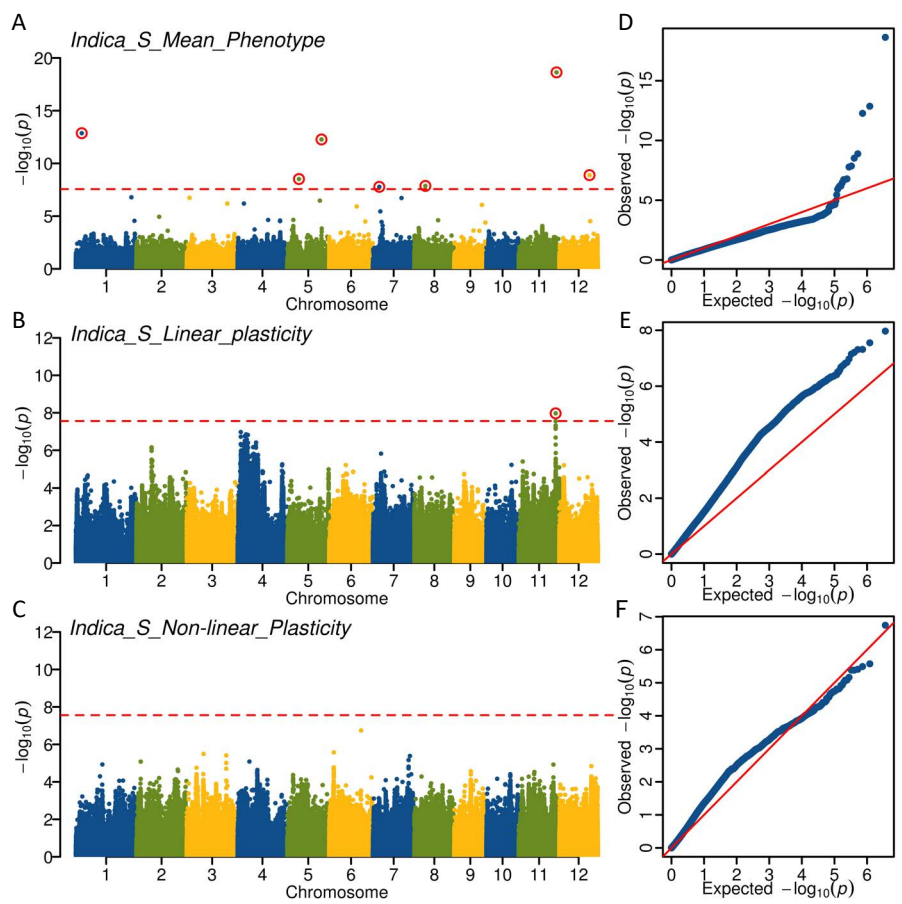

**Fig. S 45** GWAS results of three phenotypic measures of S in the *Indica* subspecies. (A-C) Manhattan plots of (A) the mean phenotype, (B) the linear plasticity, and (C) the non-linear plasticity, the horizontal dashed line indicates the threshold at  $2.7 \times 10^{-8}$ . The significantly associated loci (SALs) were labeled with red circles. (D-F) Quantile-quantile plots of the mean phenotype (D), the linear plasticity (E), and the non-linear plasticity (F).

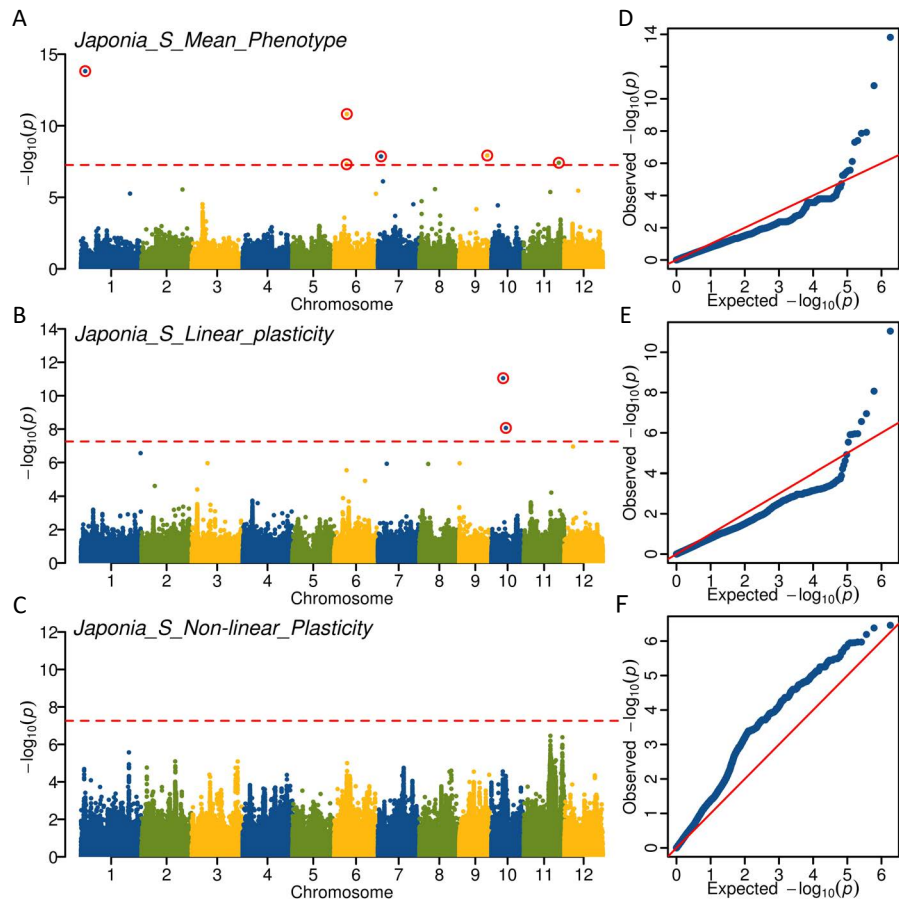

**Fig. S 46** GWAS results of three phenotypic measures of S in the *Japonica* subspecies. (A-C) Manhattan plots of (A) the mean phenotype, (B) the linear plasticity, and (C) the non-linear plasticity, the horizontal dashed line indicates the threshold at  $5.5 \times 10^{-8}$ . The significantly associated loci (SALs) were labeled with red circles. (D-F) Quantile-quantile plots of the mean phenotype (D), the linear plasticity (E), and the non-linear plasticity (F).



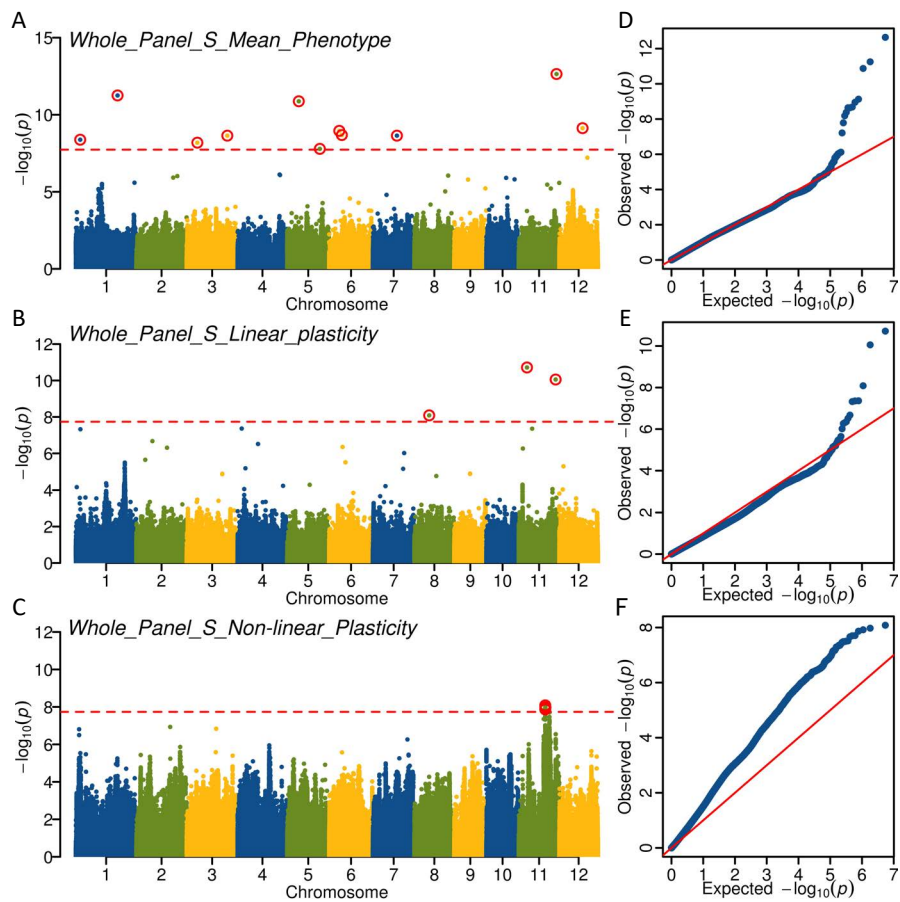

**Fig. S 47** GWAS results of three phenotypic measures of S in the whole panel. (A-C) Manhattan plots of (A) the mean phenotype, (B) the linear plasticity, and (C) the non-linear plasticity, the horizontal dashed line indicates the threshold at  $1.8 \times 10^{-8}$ . The significantly associated loci (SALs) were labeled with red circles. (D-F) Quantile-quantile plots of the mean phenotype (D), the linear plasticity (E), and the non-linear plasticity (F).

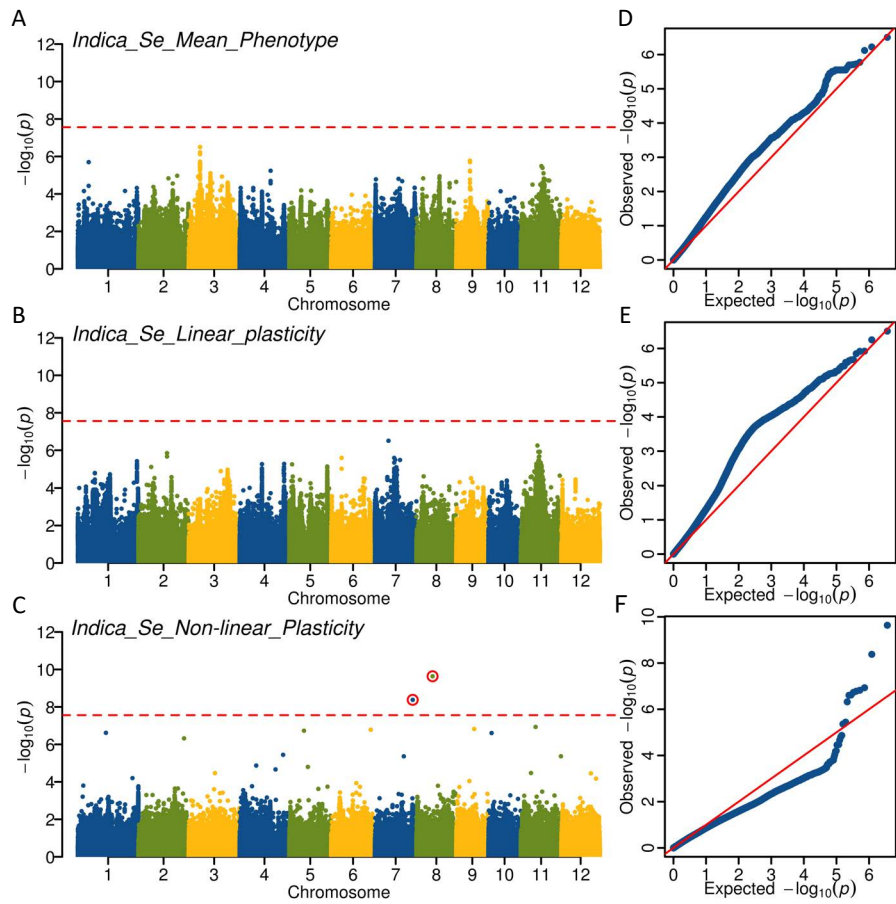

**Fig. S 48** GWAS results of three phenotypic measures of Se in the *Indica* subspecies. (A-C) Manhattan plots of (A) the mean phenotype, (B) the linear plasticity, and (C) the non-linear plasticity, the horizontal dashed line indicates the threshold at  $2.7 \times 10^{-8}$ . The significantly associated loci (SALs) were labeled with red circles. (D-F) Quantile-quantile plots of the mean phenotype (D), the linear plasticity (E), and the non-linear plasticity (F).

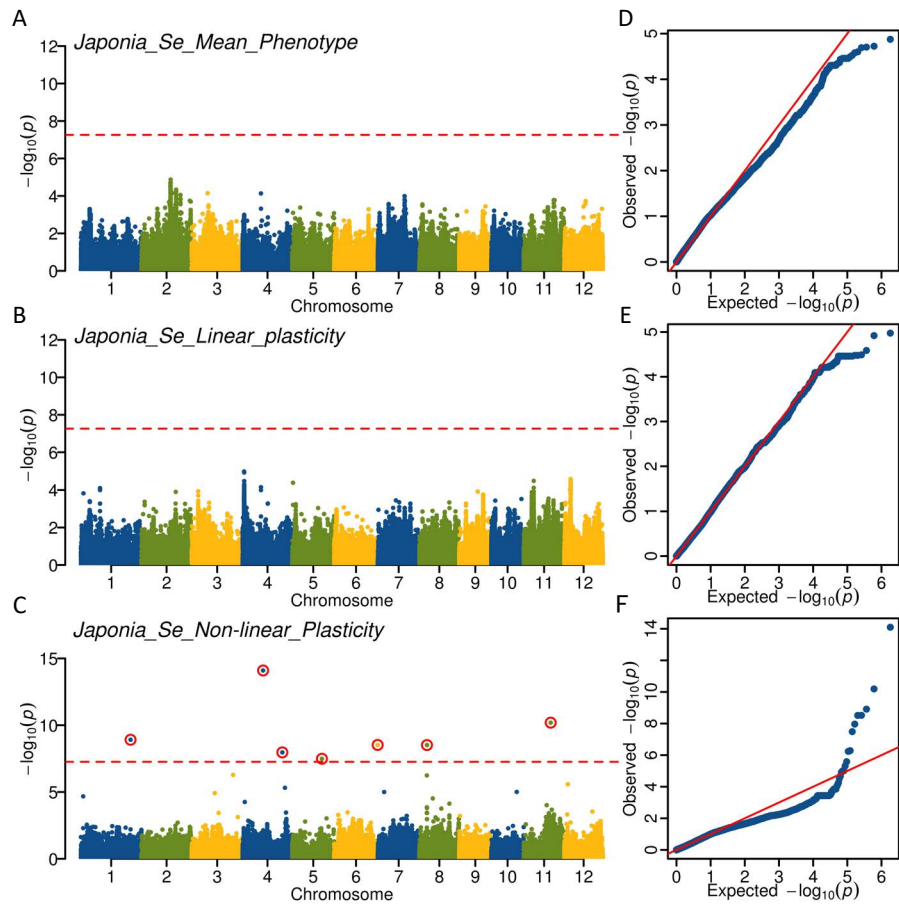

**Fig. S 49** GWAS results of three phenotypic measures of Se in the *Japonica* subspecies. (A-C) Manhattan plots of (A) the mean phenotype, (B) the linear plasticity, and (C) the non-linear plasticity, the horizontal dashed line indicates the threshold at  $5.5 \times 10^{-8}$ . The significantly associated loci (SALs) were labeled with red circles. (D-F) Quantile-quantile plots of the mean phenotype (D), the linear plasticity (E), and the non-linear plasticity (F).

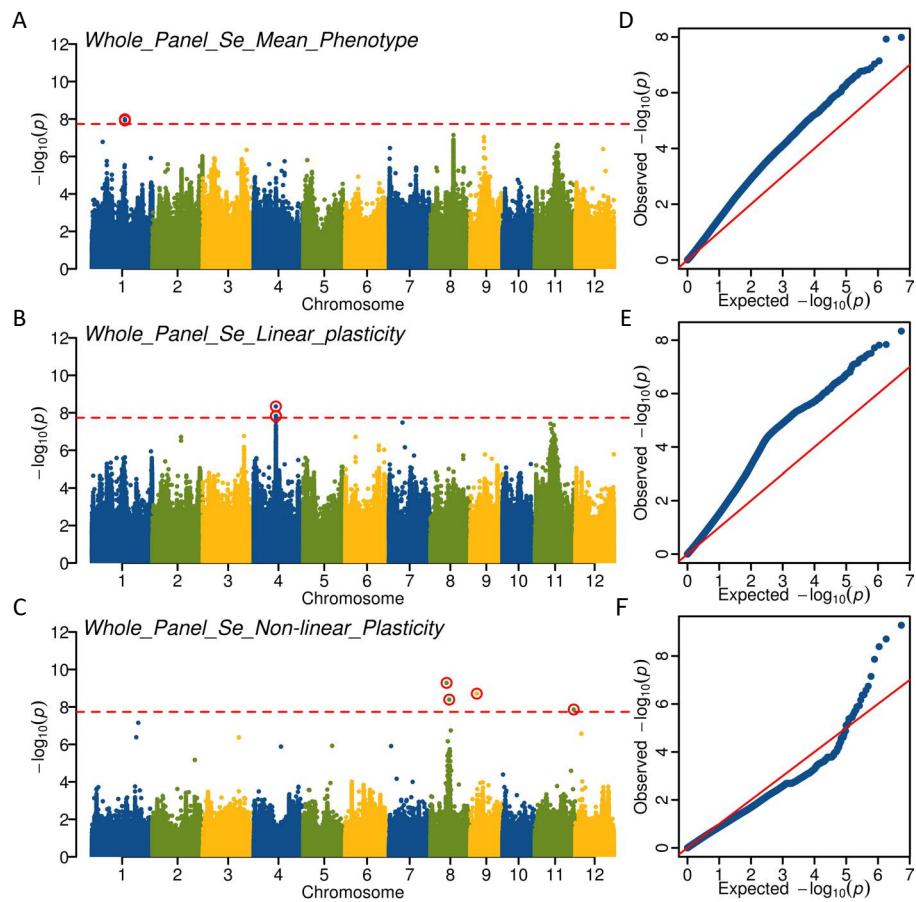

**Fig. S 50** GWAS results of three phenotypic measures of Se in the whole panel. (A-C) Manhattan plots of (A) the mean phenotype, (B) the linear plasticity, and (C) the non-linear plasticity, the horizontal dashed line indicates the threshold at  $1.8e-8$ . The significantly associated loci (SALs) were labeled with red circles. (D-F) Quantile-quantile plots of the mean phenotype (D), the linear plasticity (E), and the non-linear plasticity (F).

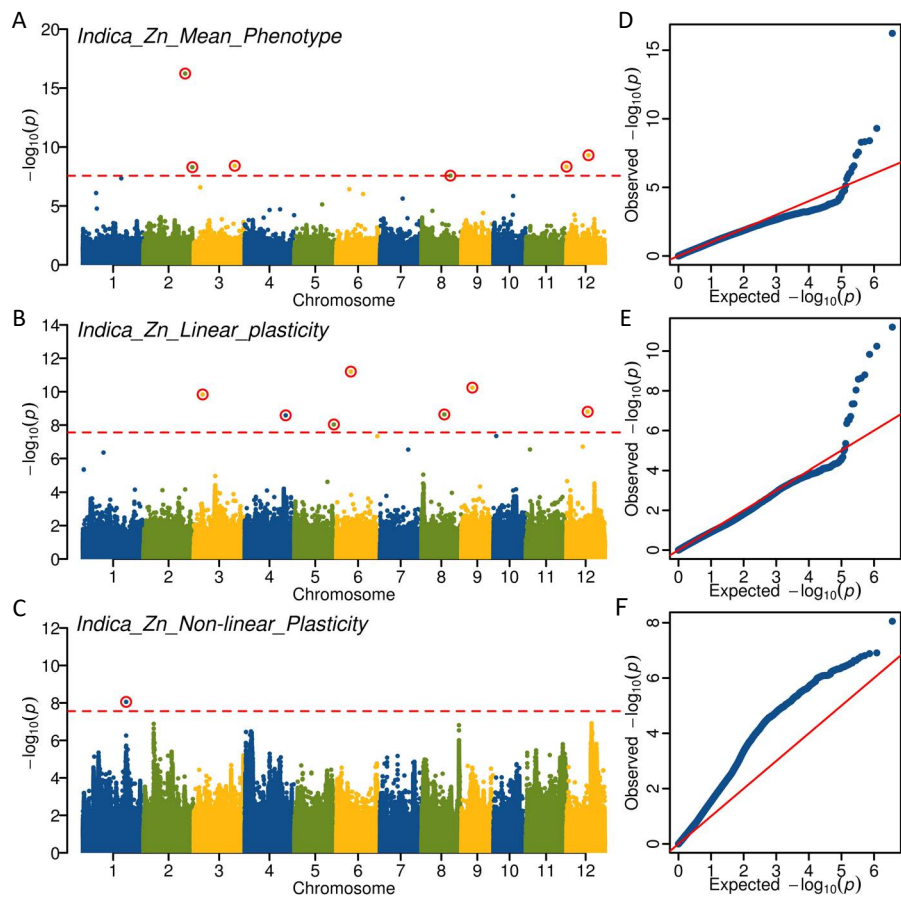

**Fig. S 51** GWAS results of three phenotypic measures of Zn in the *Indica* subspecies. (A-C) Manhattan plots of (A) the mean phenotype, (B) the linear plasticity, and (C) the non-linear plasticity, the horizontal dashed line indicates the threshold at  $2.7 \times 10^{-8}$ . The significantly associated loci (SALs) were labeled with red circles. (D-F) Quantile-quantile plots of the mean phenotype (D), the linear plasticity (E), and the non-linear plasticity (F).

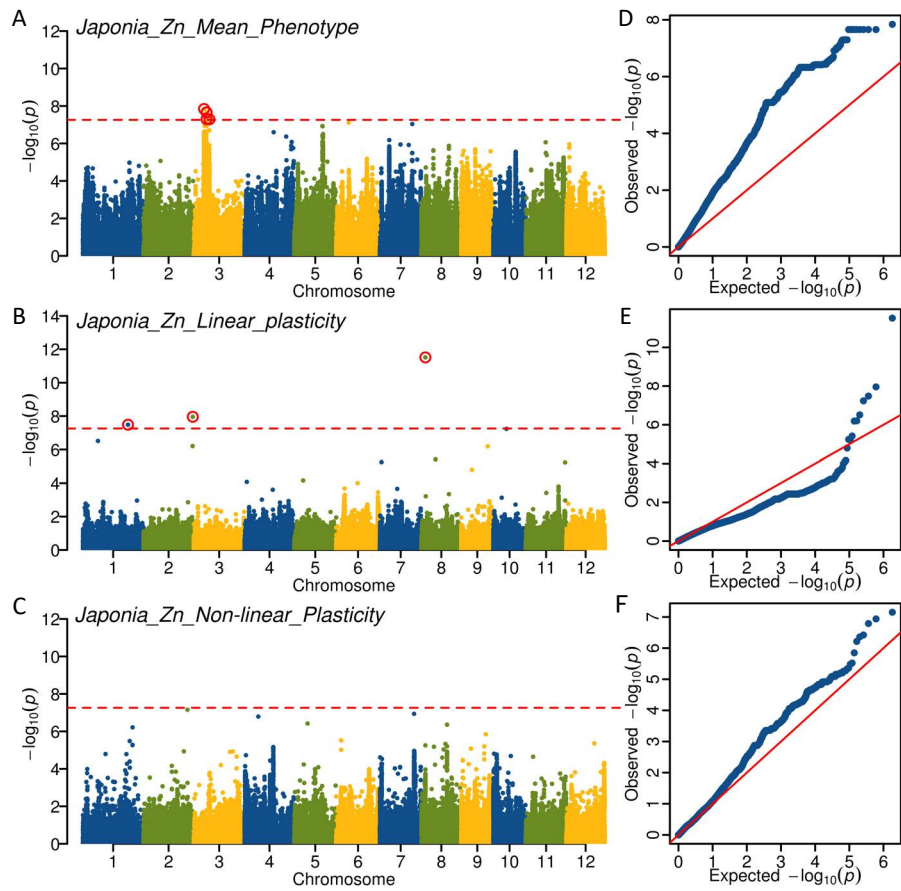

**Fig. S 52** GWAS results of three phenotypic measures of Zn in the *Japonica* subspecies. (A-C) Manhattan plots of (A) the mean phenotype, (B) the linear plasticity, and (C) the non-linear plasticity, the horizontal dashed line indicates the threshold at  $5.5 \times 10^{-8}$ . The significantly associated loci (SALs) were labeled with red circles. (D-F) Quantile-quantile plots of the mean phenotype (D), the linear plasticity (E), and the non-linear plasticity (F).

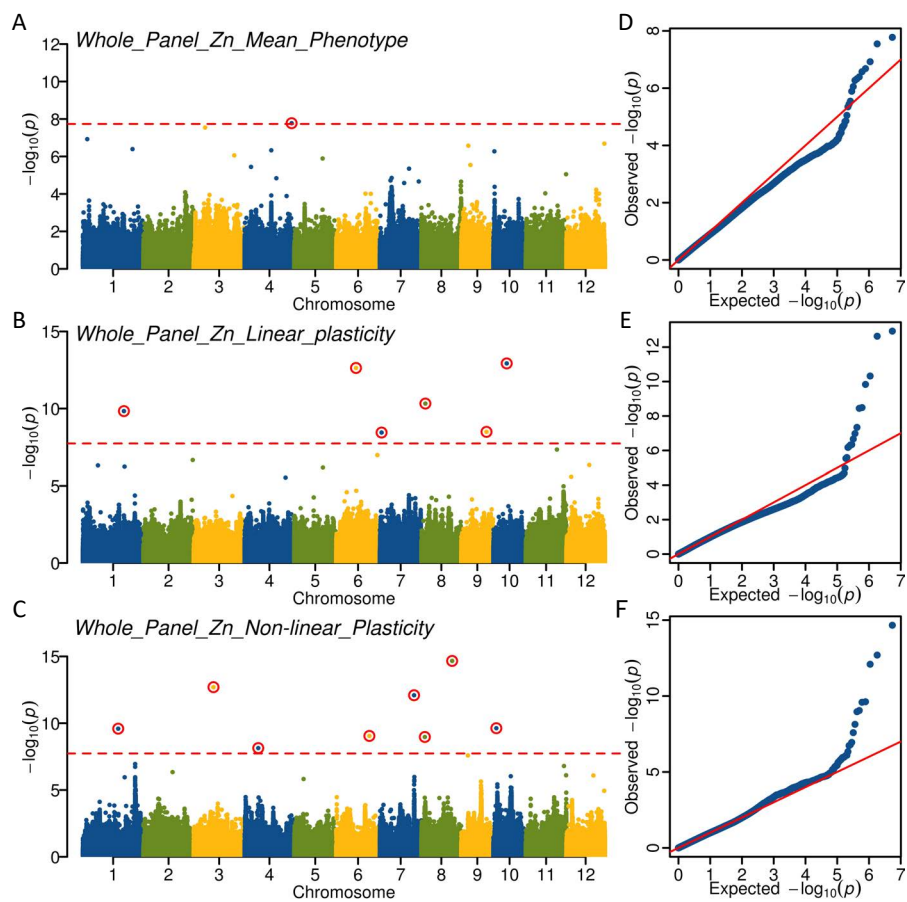

**Fig. S 53** GWAS results of three phenotypic measures of Zn in the whole panel. (A-C) Manhattan plots of (A) the mean phenotype, (B) the linear plasticity, and (C) the non-linear plasticity, the horizontal dashed line indicates the threshold at  $1.8 \times 10^{-8}$ . The significantly associated loci (SALs) were labeled with red circles. (D-F) Quantile-quantile plots of the mean phenotype (D), the linear plasticity (E), and the non-linear plasticity (F).





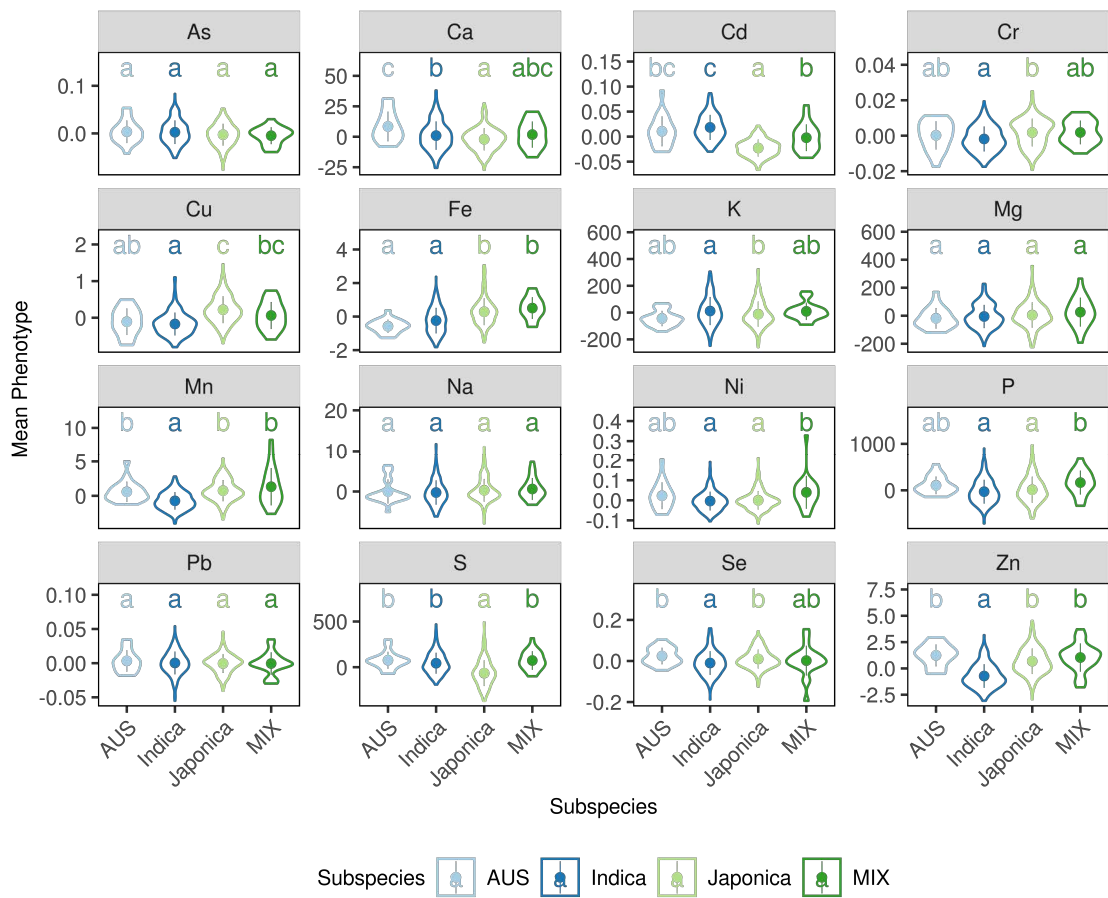

**Fig. S 55** Violin plots for the mean phenotype value in each rice subspecies. The width of each violin denotes the kernel density, the point and line in each violin denotes the mean value and the standard deviation. The letters above each violin denote the significant differences between different subspecies (Kruskal-Wallis test,  $P < 0.05$ ).

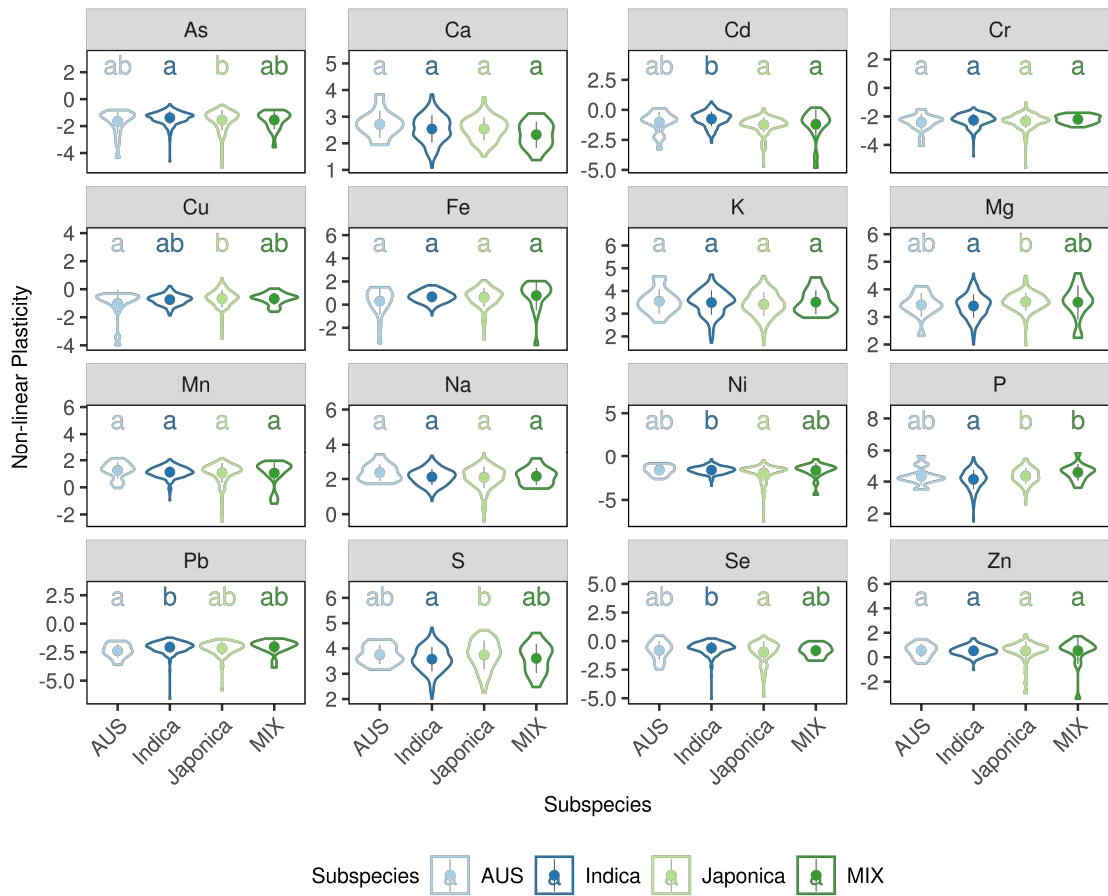

**Fig. S 56** Violin plots for the non-linear plasticity in each rice subspecies. The width of each violin denotes the kernel density, the point and line in each violin denotes the mean value and the standard deviation. The letters above each violin denote the significant differences between different subspecies (Kruskal-Wallis test,  $P < 0.05$ ).

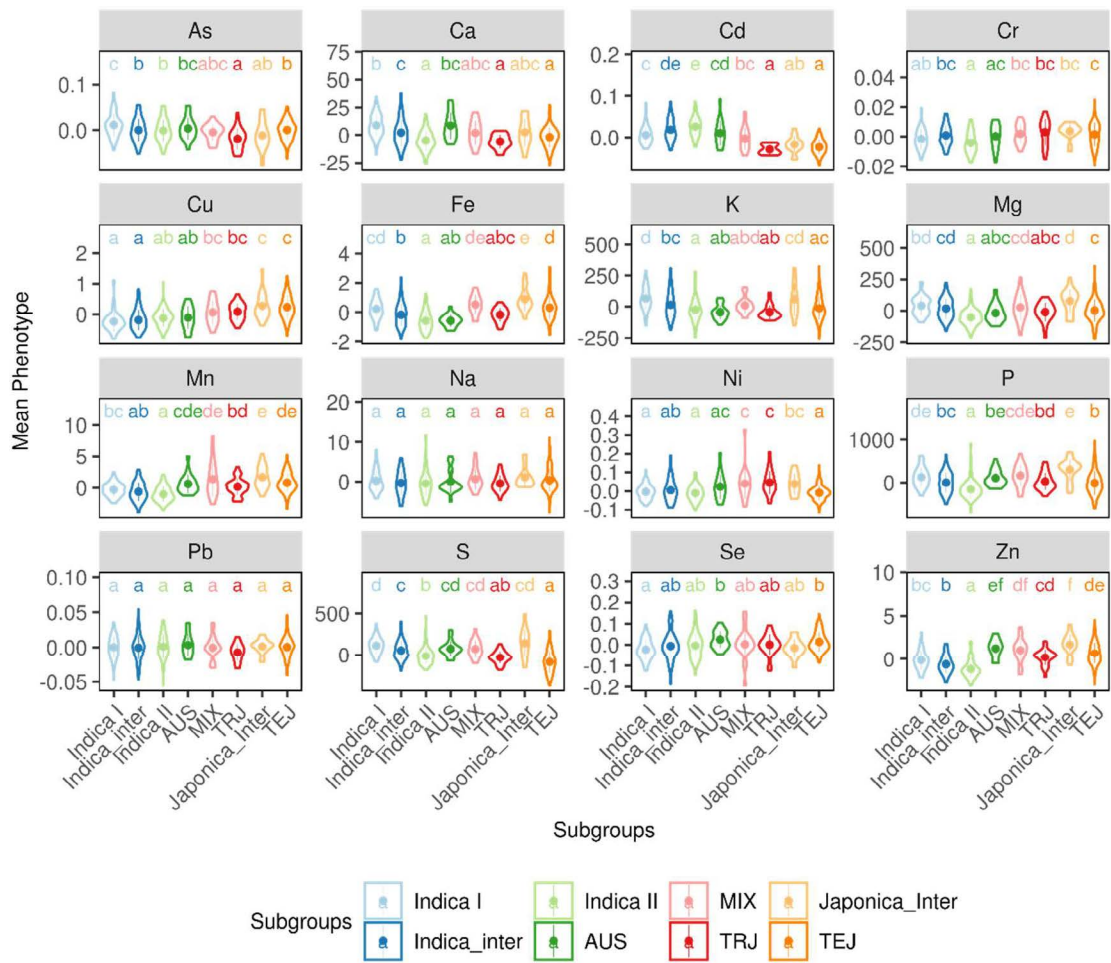

**Fig. S 57** Violin plots for the mean phenotype value in each rice subgroups. The width of each violin denotes the kernel density, the point and line in each violin denotes the mean value and the standard deviation. The letters above each violin denote the significant differences between different subgroups (Kruskal-Wallis test,  $P < 0.05$ ).

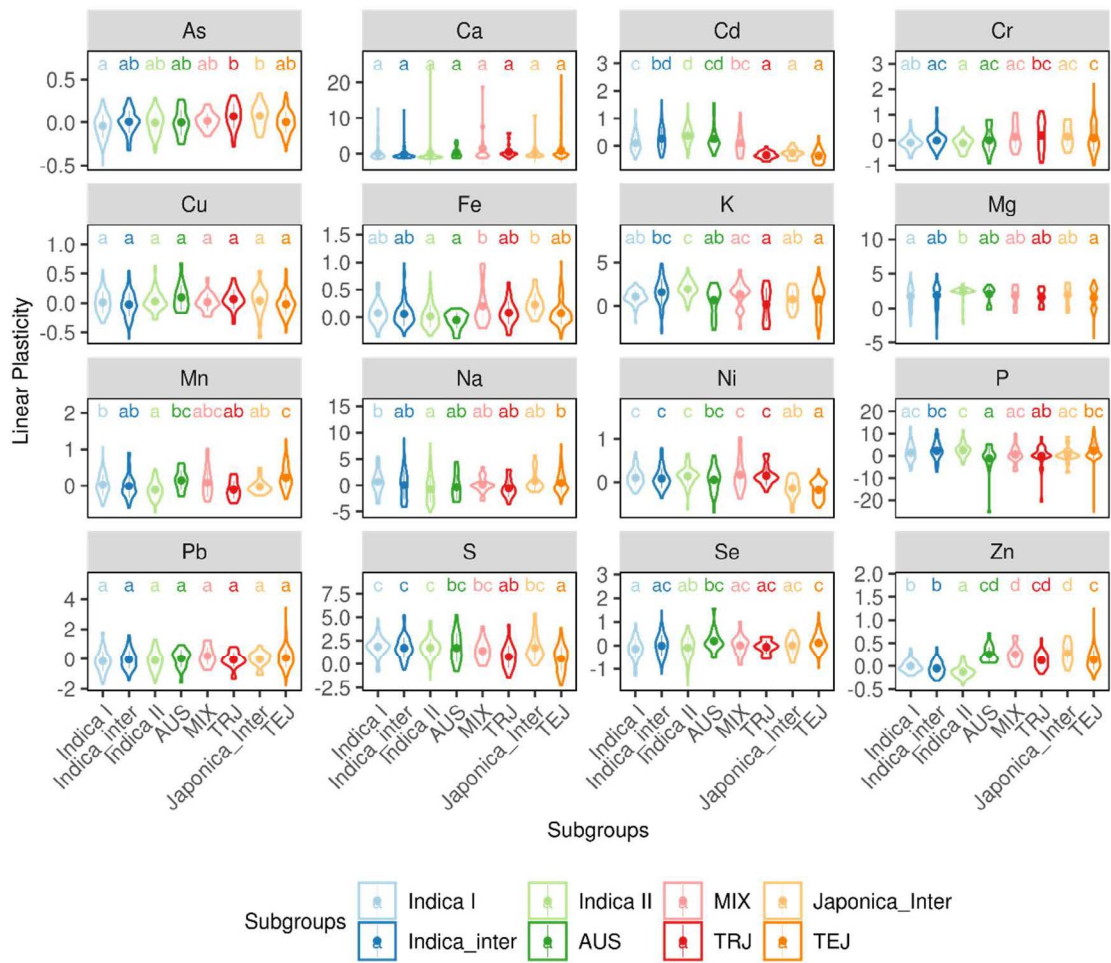

**Fig. S 58** Violin plots for the linear plasticity value in each rice subgroups. The width of each violin denotes the kernel density, the point and line in each violin denotes the mean value and the standard deviation. The letters above each violin denote the significant differences between different subgroups (Kruskal-Wallis test,  $P < 0.05$ ).

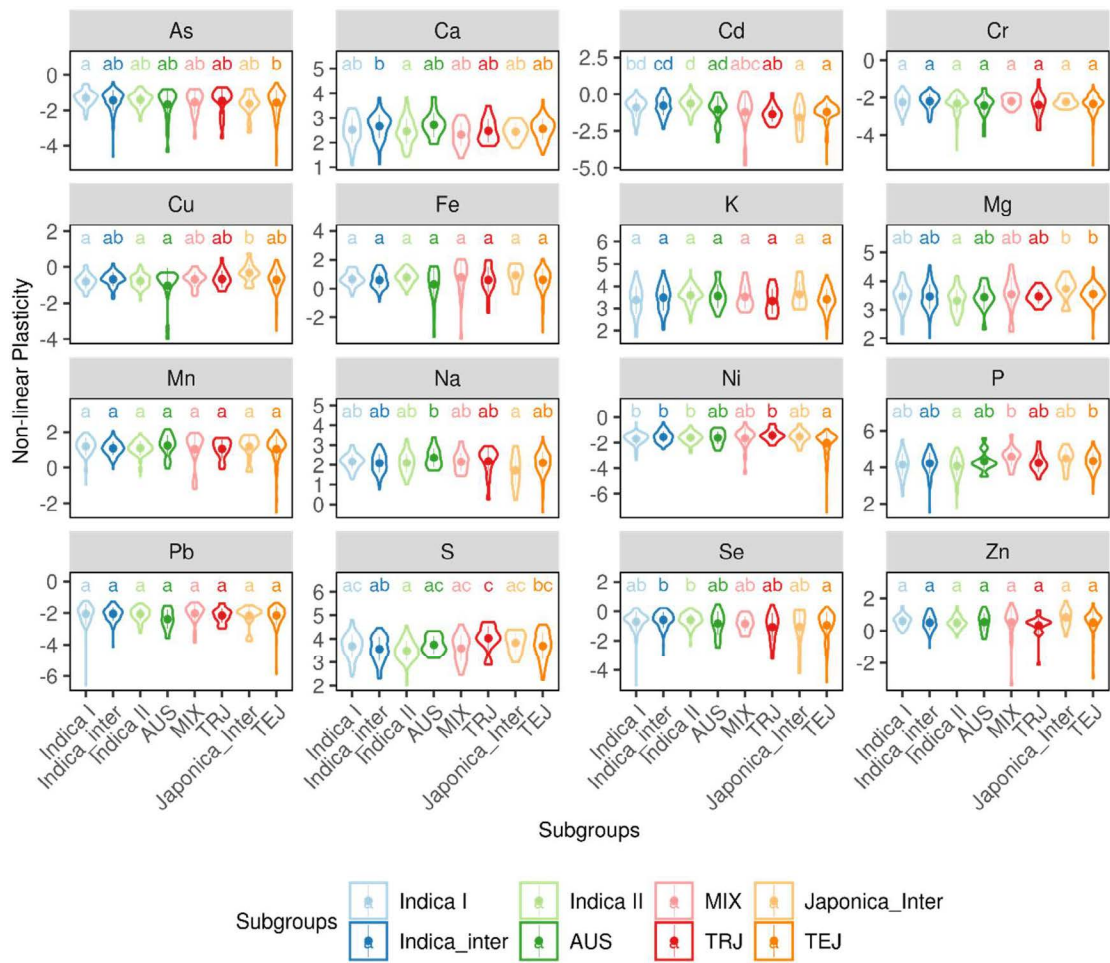

**Fig. S 59** Violin plots for the non-linear plasticity value in each rice subgroups. The width of each violin denotes the kernel density, the point and line in each violin denotes the mean value and the standard deviation. The letters above each violin denote the significant differences between different subgroups (Kruskal-Wallis test,  $P < 0.05$ ).

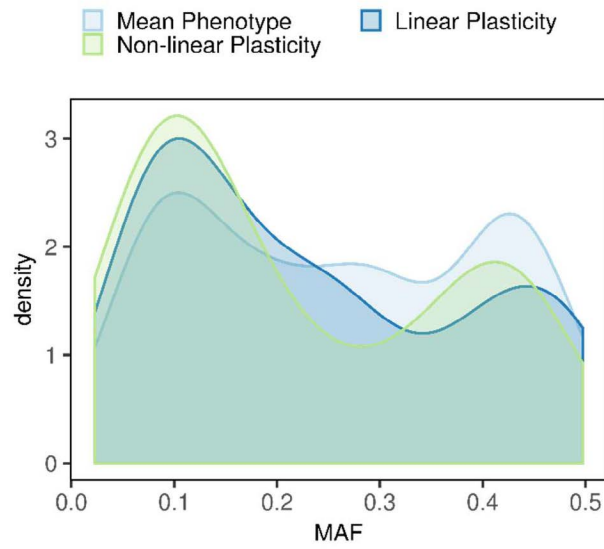

**Fig. S 60** Density plot of minor allele frequency (MAF) for SALs related to three phenotypic measures (the mean phenotype, linear-plasticity, and non-linear plasticity). The y-axis denotes the kernel density of the distribution.

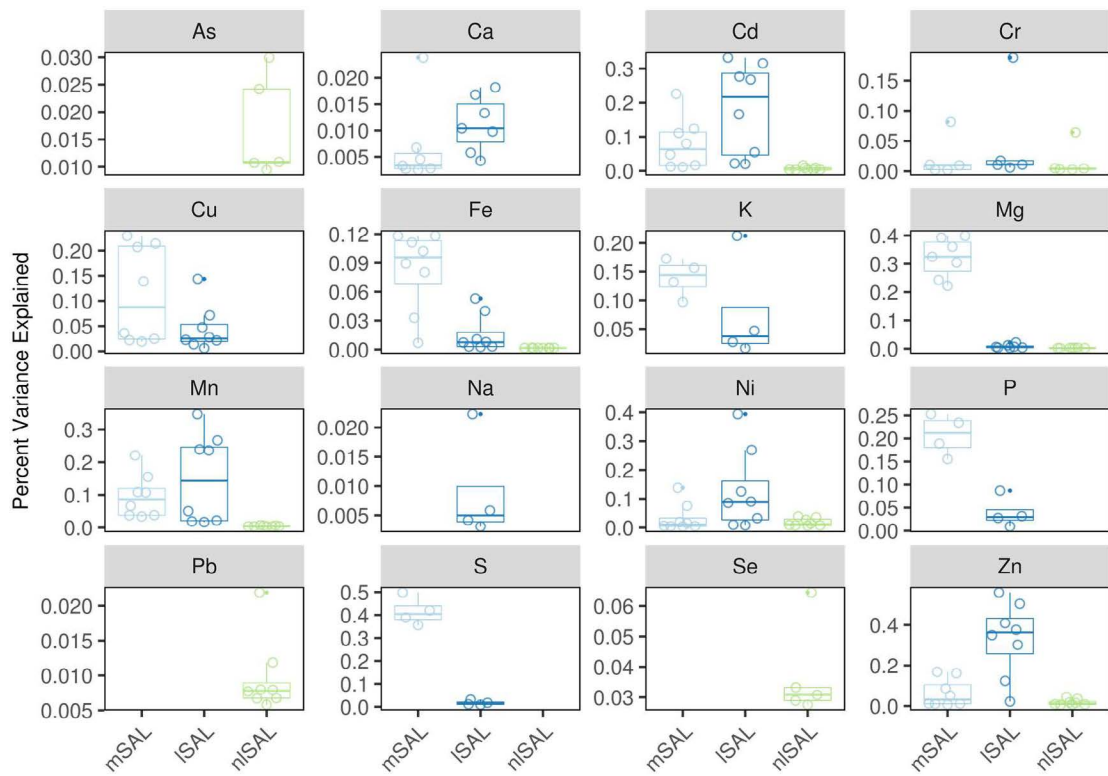

**Fig. S 61** Boxplots for the percent variance explained (PVE) by three types of SALs in each environment. The PVE for SALs with a number less than two was not estimated. The blanks indicate the number of identified SALs less than two
